# Supplementary material for: Palladium-catalyzed C–H bond activation and decarboxylation for the assembly of indolo[1,2-f]phenanthridine
Source: Royal Society of Chemistry journal article supplement (doi:10.1039/d4ob01383b), 2024-01-01

**Supporting Information**  
*for*  
**Palladium-Catalyzed C-H Bond Activation and Decarboxylation for  
the Assembly of Indolo[1,2-f]phenanthridine**

Xiaobing Liu,<sup>a</sup> Yong-Liang Ban,<sup>a</sup> Yanjie Liu,<sup>a</sup> Mengdie Zhuang<sup>a</sup> and Yao Zhou<sup>\*b</sup>

<sup>a</sup> School of Chemistry and Chemical Engineering, Zhoukou Normal University, Zhoukou, Henan 466000, People's Republic of China

<sup>b</sup> Hubei Key Laboratory of Pollutant Analysis & Reuse Technology, College of Chemistry and Chemical Engineering, Hubei Normal University, Huangshi, Hubei 435002, People's Republic of China

\*E-mail: yaozhou@hbnu.edu.cn

## Table of Contents

|                                                                       |    |
|-----------------------------------------------------------------------|----|
| 1. General information.....                                           | 3  |
| 2. General procedure for the synthesis of <b>3</b> and <b>4</b> ..... | 4  |
| 3. Crystal data of <b>4e</b> .....                                    | 5  |
| 4. Characterization data for products.....                            | 6  |
| 5. NMR spectroscopic data .....                                       | 17 |

## 1. General information

All chemicals were purchased from Adamas Reagent, Ltd, Energy chemical company, J&K Scientific Ltd, Alfa Aesa chemical company and so forth. Unless otherwise stated, all experiments were conducted in a 25 mL Schlenk reaction tube under N<sub>2</sub> atmosphere. Reactions were monitored by TLC or GC-MS analysis. Flash column chromatography was performed over silica gel (200-300 mesh).

<sup>1</sup>H-NMR and <sup>13</sup>C-NMR spectra were recorded in CDCl<sub>3</sub> on a Bruker Avance 500 spectrometer (500 MHz <sup>1</sup>H, 125 MHz <sup>13</sup>C) at room temperature. Chemical shifts were reported in ppm on the scale relative to CDCl<sub>3</sub> ( $\delta$  = 7.26 for <sup>1</sup>H-NMR,  $\delta$  = 77.00 for <sup>13</sup>C-NMR) or DMSO-*d*<sub>6</sub> ( $\delta$  = 2.50 for <sup>1</sup>H-NMR,  $\delta$  = 39.60 for <sup>13</sup>C-NMR) as an internal reference. High resolution mass spectra were recorded using Q-TOF time-of-flight mass spectrometer. Coupling constants (*J*) were reported in Hertz (Hz).

The starting materials **1** were synthesized according to methods reported previous literatures.<sup>1,2</sup>

---

<sup>1</sup> R. Liu, Q. Wang, Y. Wei and M. Shi, *Chem. Commun.*, **2018**, 54, 1225.

<sup>2</sup> K. Naveen, S. Nikson, P. Perumal *Adv. Synth. Catal.*, **2017**, 359, 2407.

## 2. General procedure for the synthesis of **3** and **4**

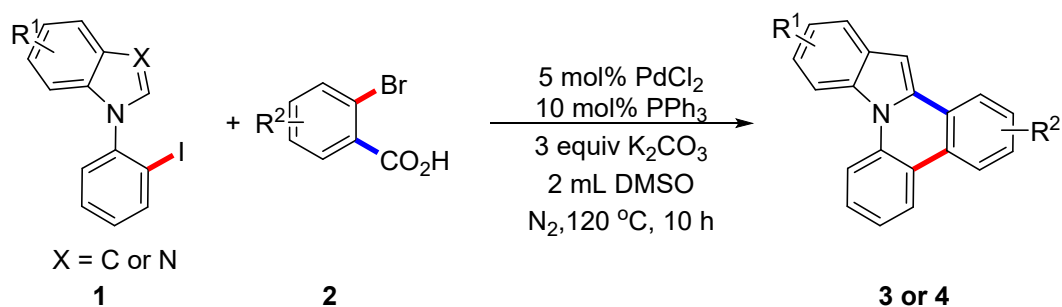

The mixture of **1** (0.2 mmol, 1.0 equiv), **2** (0.24 mmol, 1.2 equiv), PdCl<sub>2</sub> (1.7 mg, 0.01 mmol, 5 mol %), PPh<sub>3</sub> (5.2 mg, 0.02 mmol, 10 mol %) and K<sub>3</sub>CO<sub>3</sub> (82.8 mg, 0.6 mmol, 3.0 equiv) in DMSO (2 mL) was stirred under nitrogen atmosphere at 120 °C for 10 h (oil bath temperature). After the completion of the reaction (monitored by TLC), the reaction mixture was washed by saturated NH<sub>4</sub>Cl solution and then evaporated under reduced pressure, the crude product was purified by column chromatography to provide the desired product **3** or **4**.

### 3. Crystal data of 4e

Crystallographic data for compound **4e** (CCDC-2016614) has been deposited with the Cambridge Crystallographic Data Centre, Copies of the data can be obtained, free of charge, on application to CCDC (Email: deposit@ccdc.cam.ac.uk).

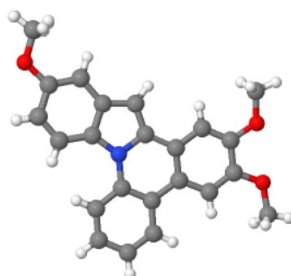

ORTEP view with ellipsoids (at the 30% probability level)

|                                                               |                |                                  |                |
|---------------------------------------------------------------|----------------|----------------------------------|----------------|
| Bond precision: C-C = 0.0033 Å                                |                | Wavelength=0.71073               |                |
| Cell:                                                         | a=14.5848 (15) | b=8.7233 (10)                    | c=15.8098 (18) |
|                                                               | alpha=90       | beta=115.796 (13)                | gamma=90       |
| Temperature:                                                  | 300 K          |                                  |                |
|                                                               | Calculated     | Reported                         |                |
| Volume                                                        | 1811.0 (4)     | 1811.0 (4)                       |                |
| Space group                                                   | P 21/c         | P 1 21/c 1                       |                |
| Hall group                                                    | -P 2ybc        | -P 2ybc                          |                |
| Moiety formula                                                | C23 H19 N O3   | C23 H19 N O3                     |                |
| Sum formula                                                   | C23 H19 N O3   | C23 H19 N O3                     |                |
| Mr                                                            | 357.39         | 357.39                           |                |
| Dx, g cm-3                                                    | 1.311          | 1.311                            |                |
| Z                                                             | 4              | 4                                |                |
| Mu (mm-1)                                                     | 0.087          | 0.087                            |                |
| F000                                                          | 752.0          | 752.0                            |                |
| F000'                                                         | 752.35         |                                  |                |
| h, k, lmax                                                    | 20, 11, 21     | 19, 11, 21                       |                |
| Nref                                                          | 4916           | 4122                             |                |
| Tmin, Tmax                                                    | 0.990, 0.991   | 0.783, 1.000                     |                |
| Tmin'                                                         | 0.990          |                                  |                |
| Correction method= # Reported T Limits: Tmin=0.783 Tmax=1.000 |                |                                  |                |
| AbsCorr = MULTI-SCAN                                          |                |                                  |                |
| Data completeness= 0.838                                      |                | Theta (max)= 29.246              |                |
| R(reflections)= 0.0644 ( 2264)                                |                | wR2(reflections)= 0.1626 ( 4122) |                |
| S = 1.021                                                     |                | Npar= 258                        |                |

#### 4. Characterization data for products

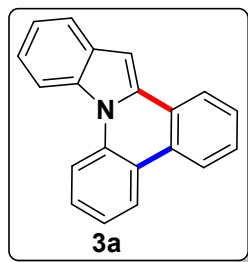

##### indolo[1,2-f]phenanthridine (3a) (CAS: 945472-69-5)

The reaction was performed following the general procedure. The residue was purified by flash column chromatograph (silica gel, 100% petroleum) to give the product as a pale yellow solid (50.2 mg, 94%). <sup>1</sup>H NMR (500 MHz, CDCl<sub>3</sub>) δ 8.53 (d, *J* = 8.4 Hz, 1H), 8.39 (d, *J* = 8.3 Hz, 1H), 8.30 (dd, *J* = 8.1, 1.5 Hz, 1H), 8.25 – 8.16 (m, 1H), 8.15 – 8.08 (m, 1H), 7.86 (dd, *J* = 7.3, 1.6 Hz, 1H), 7.57 (ddd, *J* = 8.6, 7.2, 1.5 Hz, 1H), 7.52 – 7.45 (m, 2H), 7.44 – 7.30 (m, 3H), 7.26 (s, 1H). <sup>13</sup>C NMR (125 MHz, CDCl<sub>3</sub>) δ 136.0, 135.3, 133.9, 130.4, 128.8, 128.2, 127.8, 126.9, 126.2, 124.2, 124.0, 123.1, 122.4, 122.1, 122.1, 121.8, 121.1, 116.4, 114.3, 96.3.

##### 14-methylindolo[1,2-f]phenanthridine (3b) (CAS: 2226086-29-7)

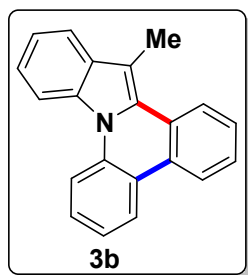

The reaction was performed following the general procedure. The residue was purified by flash column chromatograph (silica gel, 100% petroleum) to give the product as a pale yellow solid (50.1 mg, 89%). <sup>1</sup>H NMR (500 MHz, CDCl<sub>3</sub>) δ 8.44 (dd, *J* = 8.5, 1.1 Hz, 1H), 8.31 (ddd, *J* = 22.6, 7.3, 1.6 Hz, 2H), 8.21 (ddd, *J* = 16.9, 8.1, 1.4 Hz, 2H), 7.90 – 7.78 (m, 1H), 7.55 – 7.47 (m, 2H), 7.47 – 7.36 (m, 3H), 7.28 (td, *J* = 7.6, 7.0, 1.1 Hz, 1H), 2.79 (s, 3H). <sup>13</sup>C NMR (125 MHz, CDCl<sub>3</sub>) δ 136.01, 132.5, 131.3, 130.2, 128.6, 128.0, 127.8, 127.6, 126.8, 125.1, 123.8, 122.7, 122.3, 122.2, 122.1, 121.1, 118.8, 116.2, 114.0, 106.9, 11.9.

##### 13-methylindolo[1,2-f]phenanthridine (3c) (CAS: 945472-68-4)

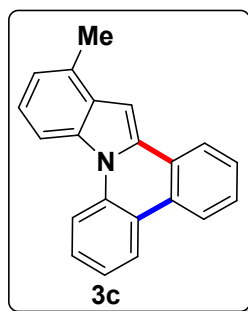

The reaction was performed following the general procedure. The residue was purified by flash column chromatograph (silica gel, 100% petroleum) to give the product as a pale yellow solid (47.8 mg, 85%). <sup>1</sup>H NMR (500 MHz, CDCl<sub>3</sub>) δ 8.51 (dd, *J* = 8.5, 1.0 Hz, 1H), 8.27 (dd, *J* = 8.1, 1.5 Hz, 1H), 8.21 (d, *J* = 8.6 Hz, 1H), 8.17 (dd, *J* = 7.0, 2.1 Hz, 1H), 8.15 – 8.10 (m, 1H), 7.55 (ddd, *J* = 8.5, 7.0, 1.5 Hz, 1H), 7.46 (tt, *J* = 7.2, 5.4 Hz, 2H), 7.36 – 7.28 (m, 2H), 7.26 (s, 1H), 7.18 (d, *J* = 7.1 Hz, 1H), 2.73 (s, 3H). <sup>13</sup>C NMR (125 MHz, CDCl<sub>3</sub>) δ 135.9, 134.6, 133.6, 130.2, 130.1, 128.6, 128.0, 127.5, 126.7, 126.2, 124.0, 123.8, 122.9, 122.3, 122.1, 122.1, 121.9, 116.3, 111.8, 94.6, 19.0.

### 12-methylindolo[1,2-f]phenanthridine (3d) (CAS: 945472-67-3)

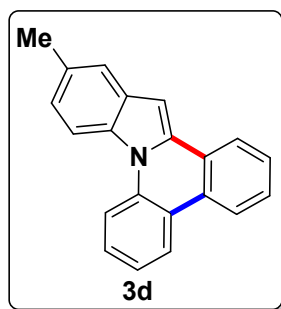

The reaction was performed following the general procedure. The residue was purified by flash column chromatograph (silica gel, 100% petroleum) to give the product as a pale yellow solid (49.5 mg, 88%).  $^1\text{H}$  NMR (500 MHz,  $\text{CDCl}_3$ )  $\delta$  8.49 (d,  $J = 8.4$  Hz, 1H), 8.29 (d,  $J = 7.9$  Hz, 1H), 8.24 (d,  $J = 8.6$  Hz, 1H), 8.22 – 8.16 (m, 1H), 8.15 – 8.05 (m, 1H), 7.61 (s, 1H), 7.59 – 7.53 (m, 1H), 7.48 (td,  $J = 6.3, 5.7, 3.5$  Hz, 2H), 7.32 (t,  $J = 7.5$  Hz, 1H), 7.24 – 7.12 (m, 2H), 2.56 (s, 3H).  $^{13}\text{C}$  NMR (125 MHz,  $\text{CDCl}_3$ )  $\delta$  136.0, 135.2, 132.2, 131.12, 130.6, 128.6, 128.1, 127.6, 126.8, 126.2, 124.0, 123.9, 123.6, 122.7, 122.3, 121.9, 120.6, 116.1, 113.8, 95.7, 21.4.

### 11-methylindolo[1,2-f]phenanthridine (3e) (CAS: 2226086-21-9)

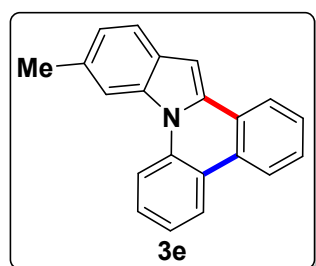

The reaction was performed following the general procedure. The residue was purified by flash column chromatograph (silica gel, 100% petroleum) to give the product as a pale yellow solid (46.6 mg, 83%).  $^1\text{H}$  NMR (500 MHz,  $\text{CDCl}_3$ )  $\delta$  8.50 (d,  $J = 8.4$  Hz, 1H), 8.26 (dd,  $J = 8.1, 1.5$  Hz, 1H), 8.16 (q,  $J = 3.1, 2.2$  Hz, 2H), 8.11 – 8.03 (m, 1H), 7.73 (d,  $J = 8.0$  Hz, 1H), 7.56 (ddd,  $J = 8.4, 7.1, 1.5$  Hz, 1H), 7.45 (tt,  $J = 7.2, 5.4$  Hz, 2H), 7.35 – 7.28 (m, 1H), 7.21 (d,  $J = 8.0$  Hz, 2H), 2.66 (s, 3H).  $^{13}\text{C}$  NMR (125 MHz,  $\text{CDCl}_3$ )  $\delta$  136.0, 134.7, 134.3, 131.7, 128.5, 128.1, 128.0, 127.4, 126.6, 126.3, 123.9, 123.8, 123.4, 122.8, 122.3, 122.0, 120.5, 116.2, 114.2, 96.0, 22.4.

### 10-methylindolo[1,2-f]phenanthridine (3f)

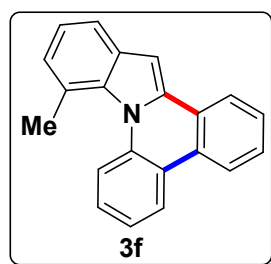

The reaction was performed following the general procedure. The residue was purified by flash column chromatograph (silica gel, 100% petroleum) to give the product as a pale yellow solid (48.9 mg, 87%).  $^1\text{H}$  NMR (500 MHz,  $\text{CDCl}_3$ )  $\delta$  8.27 – 8.15 (m, 2H), 8.12 – 8.02 (m, 1H), 7.69 (d,  $J = 7.8$  Hz, 1H), 7.56 (dd,  $J = 8.3, 1.2$  Hz, 1H), 7.54 – 7.44 (m, 3H), 7.38 – 7.28 (m, 2H), 7.25 – 7.17 (m, 2H), 2.63 (s, 3H).  $^{13}\text{C}$  NMR (125 MHz,  $\text{CDCl}_3$ )  $\delta$  136.8, 135.6, 134.5, 131.7, 128.1, 128.1, 127.8, 127.2, 125.5, 124.3, 124.0, 122.9, 122.8, 122.7, 122.5, 120.8, 118.1, 97.4, 22.5. HRMS (ESI,  $m/z$ ) calcd for  $\text{C}_{22}\text{H}_{16}\text{N}$   $[\text{M}+\text{H}]^+$ : 282.1277; found: 282.1281

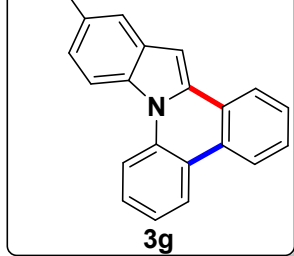

**12-methoxyindolo[1,2-f]phenanthridine (3g) (CAS: 945472-65-1)**

The reaction was performed following the general procedure. The residue was purified by flash column chromatograph (silica gel, petroleum ether : AcOEt = 10 : 1, v/v) to give the product as a pale yellow solid (48.1 mg, 81%). <sup>1</sup>H NMR (500 MHz, CDCl<sub>3</sub>) δ 8.45 (d, *J* = 8.4 Hz, 1H), 8.30 (dd, *J* = 8.1, 1.5 Hz, 1H), 8.25 (d, *J* = 9.2 Hz, 1H), 8.23 – 8.18 (m, 1H), 8.13 – 8.06 (m, 1H), 7.56 (ddd, *J* = 8.6, 7.2, 1.5 Hz, 1H), 7.52 – 7.44 (m, 2H), 7.33 (t, *J* = 7.6 Hz, 1H), 7.24 (d, *J* = 2.6 Hz, 1H), 7.16 (s, 1H), 7.02 (dd, *J* = 9.1, 2.6 Hz, 1H), 3.94 (s, 3H). <sup>13</sup>C NMR (125 MHz, CDCl<sub>3</sub>) δ 155.1, 135.8, 135.8, 131.3, 129.1, 128.7, 128.1, 127.7, 126.8, 126.0, 124.1, 124.0, 122.8, 122.4, 121.8, 115.9, 115.0, 111.9, 102.1, 95.8, 55.6.

**12-(benzyloxy)indolo[1,2-f]phenanthridine (3h) (CAS: 2226086-24-2)**

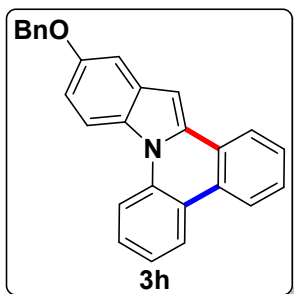

The reaction was performed following the general procedure. The residue was purified by flash column chromatograph (silica gel, petroleum ether : AcOEt = 8:1, v/v) to give the product as a pale yellow solid (56.0 mg, 75%). <sup>1</sup>H NMR (500 MHz, CDCl<sub>3</sub>) δ 8.48 (dd, *J* = 8.5, 1.1 Hz, 1H), 8.34 (dd, *J* = 8.1, 1.5 Hz, 1H), 8.28 (d, *J* = 9.2 Hz, 1H), 8.26 – 8.21 (m, 1H), 8.15 – 8.09 (m, 1H), 7.61 – 7.48 (m, 5H), 7.42 (t, *J* = 7.6 Hz, 2H), 7.39 – 7.32 (m, 3H), 7.19 (s, 1H), 7.11 (dd, *J* = 9.2, 2.6 Hz, 1H), 5.20 (s, 2H). <sup>13</sup>C NMR (125 MHz, CDCl<sub>3</sub>) δ 154.4, 137.4, 135.9, 135.8, 131.3, 129.2, 128.8, 128.6, 128.2, 127.9, 127.75, 127.6, 126.8, 126.0, 124.1, 124.0, 122.9, 122.4, 121.9, 115.9, 115.1, 112.6, 103.6, 95.9, 70.6.

**12-fluoroindolo[1,2-f]phenanthridine (3i) (CAS: 2226086-27-5)**

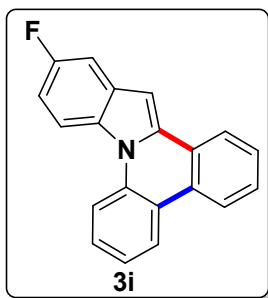

The reaction was performed following the general procedure. The residue was purified by flash column chromatograph (silica gel, 100% petroleum) to give the product as a pale yellow solid (46.7 mg, 82%). <sup>1</sup>H NMR (500 MHz, CDCl<sub>3</sub>) δ 8.35 (d, *J* = 8.4 Hz, 1H), 8.25 (dd, *J* = 8.1, 1.5 Hz, 1H), 8.20 (dd, *J* = 9.2, 4.3 Hz, 1H), 8.18 – 8.11 (m, 1H), 7.52 (ddd, *J* = 8.6, 7.1, 1.5 Hz, 1H), 7.46 (td, *J* = 5.5, 4.6, 3.2 Hz, 2H), 7.40 (dd, *J* = 9.1, 2.7 Hz, 1H), 7.34 – 7.27 (m, 1H), 7.15 – 7.02 (m, 2H). <sup>13</sup>C NMR (125 MHz, CDCl<sub>3</sub>) δ 158.5 (d, *J* = 236.3 Hz), 136.6, 135.5, 131.1 (d, *J* = 11.3 Hz), 130.4, 128.7, 128.1 (d, *J* = 13.8 Hz), 126.8, 125.6, 124.0 (d, *J* = 18.8 Hz), 123.1, 122.3, 121.9, 115.8, 114.9 (d, *J* = 8.8 Hz), 110.1, 109.9, 105.6, 105.4, 95.9 (d, *J* = 3.8 Hz). <sup>19</sup>F NMR (471 MHz, CDCl<sub>3</sub>) δ -121.7.

**12-chloroindolo[1,2-f]phenanthridine (3j) (CAS: 2169291-29-4)**



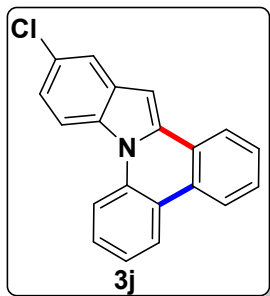

The reaction was performed following the general procedure. The residue was purified by flash column chromatograph (silica gel, 100% petroleum) to give the product as a pale yellow solid (51.8 mg, 86%).  $^1\text{H}$  NMR (500 MHz,  $\text{CDCl}_3$ )  $\delta$  8.38 (d,  $J = 8.4$  Hz, 1H), 8.30 (dd,  $J = 8.1, 1.5$  Hz, 1H), 8.25 – 8.15 (m, 2H), 8.12 – 8.01 (m, 1H), 7.74 (d,  $J = 2.2$  Hz, 1H), 7.60 – 7.52 (m, 1H), 7.49 (td,  $J = 7.0, 6.3, 3.6$  Hz, 2H), 7.35 (t,  $J = 7.6$  Hz, 1H), 7.28 (dd,  $J = 9.0, 2.2$  Hz, 1H), 7.12 (s, 1H).  $^{13}\text{C}$  NMR (125 MHz,  $\text{CDCl}_3$ )  $\delta$  136.4, 135.5, 132.2, 131.5, 128.8, 128.3, 128.2, 127.3, 126.9, 125.6, 124.2, 124.1, 123.4, 122.4, 122.1, 122.0, 120.1, 116.1, 115.1, 95.6.

### 12-bromoindolo[1,2-f]phenanthridine (3k)

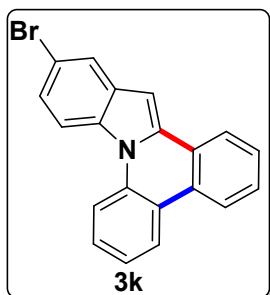

The reaction was performed following the general procedure. The residue was purified by flash column chromatograph (silica gel, 100% petroleum) to give the product as a pale yellow solid (49.0 mg, 71%).  $^1\text{H}$  NMR (500 MHz,  $\text{CDCl}_3$ )  $\delta$  8.38 (d,  $J = 8.4$  Hz, 1H), 8.30 (d,  $J = 8.0$  Hz, 1H), 8.25 – 8.14 (m, 2H), 8.13 – 8.01 (m, 1H), 7.90 (d,  $J = 2.0$  Hz, 1H), 7.56 (t,  $J = 7.8$  Hz, 1H), 7.52 – 7.45 (m, 2H), 7.45 – 7.30 (m, 2H), 7.12 (s, 1H).  $^{13}\text{C}$  NMR (125 MHz,  $\text{CDCl}_3$ )  $\delta$  136.3, 135.5, 132.5, 132.1, 128.9, 128.3, 128.3, 127.0, 125.7, 124.6, 124.3, 124.2, 123.5, 123.3, 122.5, 122.2, 116.2, 115.5, 115.1, 95.5. HRMS (ESI,  $m/z$ ) calcd for  $\text{C}_{20}\text{H}_{12}\text{BrKN}$   $[\text{M}+\text{K}]^+$ : 383.9785; found: 383.9779.

### 13-fluoroindolo[1,2-f]phenanthridine (3l)

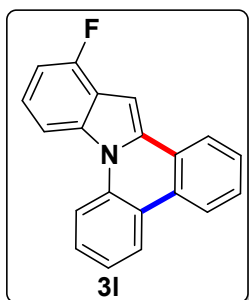

The reaction was performed following the general procedure. The residue was purified by flash column chromatograph (silica gel, 100% petroleum) to give the product as a pale yellow solid (44.5 mg, 78%).  $^1\text{H}$  NMR (500 MHz,  $\text{CDCl}_3$ )  $\delta$  8.43 (d,  $J = 8.4$  Hz, 1H), 8.26 (dd,  $J = 8.1, 1.5$  Hz, 1H), 8.16 (dt,  $J = 7.4, 3.7$  Hz, 1H), 8.12 – 8.05 (m, 2H), 7.54 (ddd,  $J = 8.6, 7.2, 1.5$  Hz, 1H), 7.47 (dt,  $J = 6.1, 3.5$  Hz, 2H), 7.37 – 7.31 (m, 1H), 7.30 – 7.24 (m, 2H), 7.02 (dd,  $J = 9.7, 7.8$  Hz, 1H).  $^{13}\text{C}$  NMR (125 MHz,  $\text{CDCl}_3$ )  $\delta$  156.2 (d,  $J = 245.0$  Hz), 136.0 (d,  $J = 10.0$  Hz), 135.5, 135.2, 128.7, 128.3, 128.1, 126.8, 125.8, 124.1, 124.0, 123.4, 122.3, 122.2 (d,  $J = 7.5$  Hz), 122.2, 119.7 (d,  $J = 22.5$  Hz), 116.3, 110.3 (d,  $J = 3.8$  Hz), 106.4 (d,  $J = 18.8$  Hz), 91.7.  $^{19}\text{F}$  NMR (471 MHz,  $\text{CDCl}_3$ )  $\delta$  -121.8. HRMS (ESI,  $m/z$ ) calcd for  $\text{C}_{23}\text{H}_{13}\text{FN}$   $[\text{M}+\text{H}]^+$ : 286.1027; found: 286.1032.

### 13-bromoindolo[1,2-f]phenanthridine (3m) (CAS: 2226086-25-3)

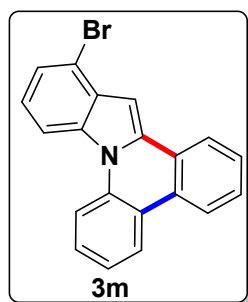

The reaction was performed following the general procedure. The residue was purified by flash column chromatograph (silica gel, 100% petroleum) to give the product as a pale yellow solid (48.3 mg, 70%).  $^1\text{H}$  NMR (500 MHz,  $\text{CDCl}_3$ )  $\delta$  8.41 (d,  $J = 8.4$  Hz, 1H), 8.31 – 8.22 (m, 2H), 8.17 (dq,  $J = 7.3, 4.0$  Hz, 1H), 8.12 (dt,  $J = 7.2, 3.7$  Hz, 1H), 7.54 (ddd,  $J = 8.7, 7.3, 1.5$  Hz, 1H), 7.52 – 7.43 (m, 3H), 7.35 (td,  $J = 7.6, 7.0, 1.1$  Hz, 1H), 7.27 (s, 1H), 7.20 (t,  $J = 8.0$  Hz, 1H).  $^{13}\text{C}$  NMR (125 MHz,  $\text{CDCl}_3$ )  $\delta$  135.7, 135.5, 133.9, 130.8, 128.8, 128.3, 128.3, 126.8, 125.6, 124.6, 124.3, 124.1, 123.5, 122.5, 122.4, 122.3, 116.3, 114.9, 113.2, 96.5.

### indolo[1,2-f]phenanthridine-12-carbonitrile (3n) (CAS: 945472-71-9)

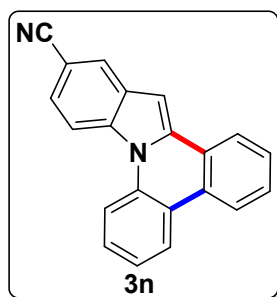

The reaction was performed following the general procedure. The residue was purified by flash column chromatograph (silica gel, petroleum ether : AcOEt = 5:1, v/v) to give the product as a pale yellow solid (32.7 mg, 56%).  $^1\text{H}$  NMR (500 MHz,  $\text{CDCl}_3$ )  $\delta$  8.37 (dd,  $J = 8.4, 1.2$  Hz, 1H), 8.34 – 8.30 (m, 2H), 8.24 – 8.18 (m, 1H), 8.13 – 8.00 (m, 2H), 7.62 – 7.49 (m, 4H), 7.41 (ddd,  $J = 8.2, 7.2, 1.1$  Hz, 1H), 7.19 (d,  $J = 0.8$  Hz, 1H).  $^{13}\text{C}$  NMR (125 MHz,  $\text{CDCl}_3$ )  $\delta$  137.4, 137.2, 135.0, 135.0, 129.9, 129.0, 128.8, 128.5, 127.0, 125.9, 125.2, 124.4, 124.3, 124.2, 122.5, 122.4, 120.1, 116.5, 114.7, 104.8, 96.3.

### methyl indolo[1,2-f]phenanthridine-12-carboxylate (3o)

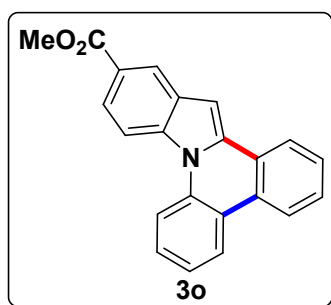

The reaction was performed following the general procedure. The residue was purified by flash column chromatograph (silica gel, petroleum ether : AcOEt = 5:1, v/v) to give the product as a pale yellow solid (47.5 mg, 73%).  $^1\text{H}$  NMR (500 MHz,  $\text{CDCl}_3$ )  $\delta$  8.48 (d,  $J = 1.8$  Hz, 1H), 8.40 (dd,  $J = 8.4, 1.1$  Hz, 1H), 8.30 – 8.20 (m, 2H), 8.18 – 8.10 (m, 1H), 8.01 (ddd,  $J = 22.1, 7.6, 3.3$  Hz, 2H), 7.53 (ddd,  $J = 8.5, 7.2, 1.4$  Hz, 1H), 7.50 – 7.41 (m, 2H), 7.33 (ddd,  $J = 8.2, 7.2, 1.1$  Hz, 1H), 7.20 (s, 1H), 3.99 (s, 3H).  $^{13}\text{C}$  NMR (125 MHz,  $\text{CDCl}_3$ )  $\delta$  167.7, 136.4, 135.9, 135.4, 129.8, 128.8, 128.3, 128.2, 126.8, 125.6, 124.2, 124.0, 123.7, 123.4, 123.4, 122.9, 122.4, 122.3, 116.4, 113.7, 97.1, 52.0. HRMS (ESI,  $m/z$ ) calcd for  $\text{C}_{22}\text{H}_{16}\text{NO}_2$   $[\text{M}+\text{H}]^+$ : 326.1176; found: 326.1180.

### 11-(trifluoromethyl)indolo[1,2-f]phenanthridine (3p)

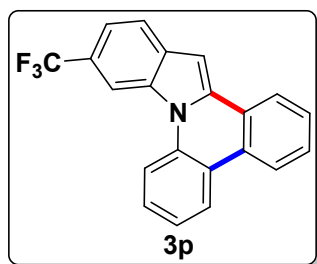

The reaction was performed following the general procedure. The residue was purified by flash column chromatograph (silica gel, 100% petroleum) to give the product as a pale yellow oil (58.3 mg, 87%). <sup>1</sup>H NMR (500 MHz, CDCl<sub>3</sub>) δ 8.55 (s, 1H), 8.37 (d, *J* = 8.4 Hz, 1H), 8.26 (dd, *J* = 8.1, 1.5 Hz, 1H), 8.17 (dd, *J* = 7.1, 2.1 Hz, 1H), 8.10 – 7.99 (m, 1H), 7.83 (d, *J* = 8.3 Hz, 1H), 7.62 – 7.53 (m, 2H), 7.49 (tt, *J* = 7.2, 5.5 Hz, 2H), 7.39 – 7.32 (m, 1H), 7.17 (s, 1H). <sup>13</sup>C NMR (125 MHz, CDCl<sub>3</sub>) δ 137.6, 135.2, 132.6, 132.5, 129.0, 128.5, 128.3, 127.1, 125.3 (q, *J* = 270.0 Hz), 125.3, 124.3, 124.1, 123.7, 123.4 (q, *J* = 31.3 Hz), 122.4, 122.1, 121.1, 118.4, (q, *J* = 3.8 Hz), 116.23, 111.5 (q, *J* = 5.0 Hz) 96.1. <sup>19</sup>F NMR (471 MHz, CDCl<sub>3</sub>) δ -60.0. HRMS (ESI, *m/z*) calcd for C<sub>21</sub>H<sub>13</sub>F<sub>3</sub>N [M+H]<sup>+</sup>: 336.0995; found: 336.0995.

### 1-(indolo[1,2-f]phenanthridin-14-yl)ethan-1-one (3q)

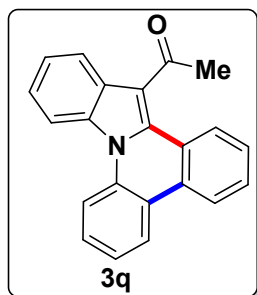

The reaction was performed following the general procedure. The residue was purified by flash column chromatograph (silica gel, petroleum ether : AcOEt = 10 : 1, v/v) to give the product as a yellow solid (26.6 mg, 43%). <sup>1</sup>H NMR (500 MHz, CDCl<sub>3</sub>) δ 8.62 (d, *J* = 8.4 Hz, 1H), 8.41 (dt, *J* = 7.0, 2.3 Hz, 2H), 8.35 (dd, *J* = 8.1, 1.2 Hz, 1H), 8.26 (dd, *J* = 8.1, 1.3 Hz, 1H), 8.22 – 8.11 (m, 1H), 7.65 (dddd, *J* = 8.4, 7.2, 5.7, 1.4 Hz, 2H), 7.59 – 7.54 (m, 1H), 7.48 (ddd, *J* = 7.7, 3.7, 1.9 Hz, 3H), 2.80 (s, 3H). <sup>13</sup>C NMR (125 MHz, CDCl<sub>3</sub>) δ 199.4, 135.8, 134.7, 133.1, 129.3, 129.1, 128.8, 128.7, 128.4, 128.0, 124.7, 124.2, 124.2, 123.4, 123.3, 122.6, 122.5, 120.8, 117.0, 114.4, 114.2, 32.1. HRMS (ESI, *m/z*) calcd for C<sub>22</sub>H<sub>16</sub>NO [M+H]<sup>+</sup>: 310.1226; found: 310.1229.

### benzo[4,5]imidazo[1,2-f]phenanthridine (3r) (CAS: 201-71-8)

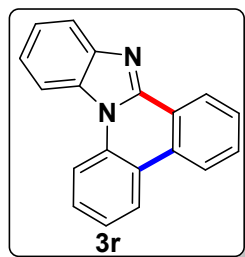

The reaction was performed following the general procedure. The residue was purified by flash column chromatograph (silica gel, petroleum ether : AcOEt = 4 : 1, v/v) to give the product as a pale yellow solid (28.4 mg, 53%). <sup>1</sup>H NMR (500 MHz, CDCl<sub>3</sub>) δ 8.84 (dd, *J* = 7.8, 1.6 Hz, 1H), 8.50 (d, *J* = 8.4 Hz, 1H), 8.42 (dd, *J* = 8.3, 1.5 Hz, 1H), 8.31 (dd, *J* = 11.0, 8.1 Hz, 2H), 8.10 – 7.99 (m, 1H), 7.74 – 7.60 (m, 3H), 7.54 – 7.40 (m, 3H). <sup>13</sup>C NMR (125 MHz, CDCl<sub>3</sub>) δ 147.5, 144.5, 134.4, 131.8, 130.4, 129.5, 129.1, 128.6, 126.0, 124.4, 124.2, 124.1, 123.4, 122.9, 122.2, 121.7, 120.3, 116.0 113.9.

**11-methylbenzo[4,5]imidazo[1,2-f]phenanthridine (3s) (CAS: 2376924-18-2) and 12-methylbenzo[4,5]imidazo[1,2-f]phenanthridine (3s') (CAS: 2376924-19-3)**

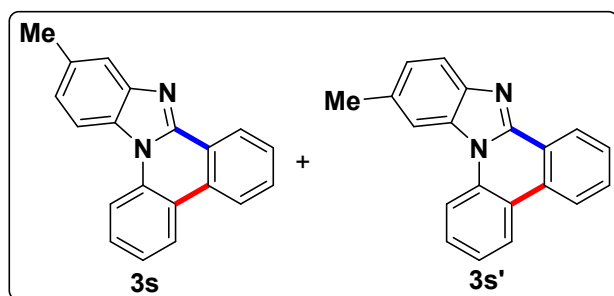

The reaction was performed following the general procedure. The residue was purified by flash column chromatograph (silica gel, petroleum ether : AcOEt = 4 : 1, v/v) to give the product as a White solid (27.6 mg, 49%). <sup>1</sup>H NMR (500 MHz, CDCl<sub>3</sub>) δ 8.82 (ddd, *J* =

8.0, 4.5, 1.7 Hz, 1H), 8.47 (dd, *J* = 14.4, 8.4 Hz, 1H), 8.41 (dd, *J* = 8.2, 2.9 Hz, 1H), 8.32 (dd, *J* = 8.1, 3.7 Hz, 1H), 8.19 – 8.02 (m, 1H), 7.95 – 7.76 (m, 1H), 7.73 – 7.59 (m, 3H), 7.45 (t, *J* = 7.6 Hz, 1H), 7.32 (d, *J* = 8.2 Hz, 1H), 2.60 (d, *J* = 32.8 Hz, 3H). <sup>13</sup>C NMR (125 MHz, CDCl<sub>3</sub>) δ 147.5, 147.1, 144.9, 142.6, 134.5, 134.4, 133.9, 132.8, 132.1, 130.2, 130.1, 129.9, 129.4, 129.3, 129.1, 129.0, 128.5, 128.5, 126.0, 125.9, 125.6, 124.4, 124.2, 124.2, 124.1, 123.6, 123.5, 122.2, 121.7, 121.6, 120.1, 119.8, 119.0, 115.99, 113.9, 113.3, 22.3, 21.6.

**1-(indolo[1,2-f]phenanthridin-14-yl)-N,N-dimethylmethanamine (3t)**

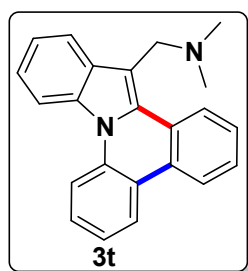

The reaction was performed following the general procedure. The residue was purified by flash column chromatograph (silica gel, DCM:EtOH = 100:1, v/v) to give the product as a pale yellow oil (47.3 mg, 73%). <sup>1</sup>H NMR (500 MHz, CDCl<sub>3</sub>) δ 8.72 (dd, *J* = 8.1, 1.4 Hz, 1H), 8.55 (d, *J* = 8.5 Hz, 1H), 8.41 (dd, *J* = 7.4, 1.9 Hz, 1H), 8.33 (dd, *J* = 8.1, 1.5 Hz, 1H), 8.28 (d, *J* = 8.0 Hz, 1H), 8.05 – 7.86 (m, 1H), 7.58 (tdd, *J* = 8.8, 7.2, 1.4 Hz, 2H), 7.52 (td, *J* = 7.7, 7.1, 1.3 Hz, 1H), 7.45 – 7.33 (m, 3H), 3.97 (s, 2H), 2.44 (s, 6H). <sup>13</sup>C NMR (125 MHz, CDCl<sub>3</sub>) δ 135.8, 132.8, 132.6, 131.8, 128.6, 128.4, 127.8, 127.5, 127.2, 127.1, 124.0, 123.1, 122.5, 122.2, 122.0, 121.5, 118.9, 116.7, 114.1, 108.8, 54.2, 45.4. HRMS (ESI, *m/z*) calcd for C<sub>23</sub>H<sub>21</sub>N<sub>2</sub> [M+H]<sup>+</sup>: 325.1699; found: 325.1672.

**2-methylindolo[1,2-f]phenanthridine (4a) and 3-methylindolo[1,2-f]phenanthridine (4a') (CAS: 1658455-12-9)**

The reaction was performed following the general procedure. The residue was purified by flash column chromatograph (silica gel, 100% petroleum) to give the product as a pale yellow solid (52.3 mg, 93% 3:1). <sup>1</sup>H NMR (500 MHz, CDCl<sub>3</sub>) δ 8.52 (dd, *J* = 8.5, 1.1 Hz, 1H), 8.38 (dd, *J* = 7.9, 5.2 Hz, 1H), 8.27 (ddd, *J* = 16.3, 8.1, 1.5 Hz, 1H), 8.10 – 7.88 (m, 2H), 7.84 (ddd, *J* = 6.8, 3.7, 1.4 Hz, 1H), 7.62 – 7.49 (m, 1H), 7.44 – 7.34 (m, 2H), 7.34 – 7.30 (m, 1H), 7.27 (dd, *J* = 8.3, 1.9 Hz, 1H), 7.21 (d, *J* = 24.6 Hz, 1H), 2.50 (s, 0.69H), 2.49 (s, 2.29H). <sup>13</sup>C NMR (125 MHz, CDCl<sub>3</sub>) δ

138.0, 137.6, 136.0, 135.6, 135.5, 135.3, 133.9, 133.8, 130.5, 130.4, 129.4, 129.1, 128.5, 128.2, 126.7, 126.0, 124.4, 124.1, 124.1, 123.9, 123.7, 123.6, 122.9, 122.9, 122.5, 122.3, 122.2, 122.1, 121.9, 121.7, 121.7, 121.0, 120.8, 116.3, 116.2, 114.2, 114.1, 96.0, 95.5, 21.8, 21.5.

**2-methoxyindolo[1,2-f]phenanthridine (4b) and 3-methoxyindolo[1,2-f]phenanthridine (4b') (CAS: 1658455-26-5)**

The reaction was performed following the general procedure. The residue was purified by flash column chromatograph (silica gel, petroleum ether : AcOEt = 10 : 1, v/v) to give the product as a yellow solid (56.4 mg, 95%, 3:1). <sup>1</sup>H NMR (500 MHz, CDCl<sub>3</sub>) δ 8.47 (d, *J* = 8.4 Hz, 1H), 8.35 (dd, *J* = 16.7, 8.6 Hz, 1H), 8.14 (td, *J* = 8.9, 8.1, 1.5 Hz, 1H), 7.98 (dd, *J* = 42.5, 8.8 Hz, 1H), 7.88 – 7.75 (m, 1H), 7.59 – 7.43 (m, 2H), 7.43 – 7.33 (m, 2H), 7.29 (td, *J* = 7.6, 7.0, 1.1 Hz, 1H), 7.11 (d, *J* = 61.5 Hz, 1H), 7.01 (ddd, *J* = 8.8, 5.4, 2.6 Hz, 1H), 3.91 (s, 2.12H), 3.90 (s, 0.76H). <sup>13</sup>C NMR (125 MHz, CDCl<sub>3</sub>) δ 159.4, 159.4, 136.1, 135.4, 135.0, 135.0, 133.9, 133.6, 130.6, 130.2, 128.7, 128.2, 127.5, 127.2, 125.7, 124.0, 123.9, 123.3, 122.9, 122.7, 122.1, 122.0, 121.8, 121.7, 121.6, 121.4, 121.0, 120.6, 120.3, 119.7, 116.2, 116.1, 116.1, 115.9, 114.2, 114.1, 106.3, 105.6, 96.2, 94.6, 55.3.

**2,3-difluoroindolo[1,2-f]phenanthridine (4c)**

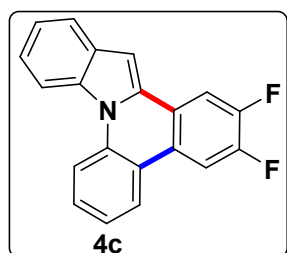

The reaction was performed following the general procedure. The residue was purified by flash column chromatograph (silica gel, 100% petroleum) to give the product as a pale yellow solid (50.9 mg, 84%). <sup>1</sup>H NMR (500 MHz, CDCl<sub>3</sub>) δ 8.26 (dd, *J* = 10.3, 6.5 Hz, 1H), 8.17 (t, *J* = 7.7 Hz, 1H), 7.80 (dd, *J* = 11.7, 6.6 Hz, 1H), 7.72 (qd, *J* = 5.5, 3.6, 3.0 Hz, 1H), 7.62 (ddd, *J* = 19.1, 9.2, 5.9 Hz, 1H), 7.55 – 7.39 (m, 2H), 7.34 (p, *J* = 7.3 Hz, 2H), 7.18 (p, *J* = 6.0 Hz, 1H), 6.91 – 6.73 (m, 1H). <sup>13</sup>C NMR (125 MHz, CDCl<sub>3</sub>) δ 150.3 (dd, *J* = 250.0, 10.0 Hz), 150.1 (dd, *J* = 250.0, 10.0 Hz), 135.5, 133.6, 133.1, 129.9, 128.9, 123.7 (dd, *J* = 7.5, 3.8 Hz), 123.7, 122.9, 122.8 (dd, *J* = 7.5, 3.8 Hz), 122.3, 121.9, 121.0, 120.3, 116.0, 114.1, 111.7 (dd, *J* = 16.3, 3.8 Hz), 110.7 (d, *J* = 17.5 Hz), 96.5. <sup>19</sup>F NMR (471 MHz, CDCl<sub>3</sub>) δ -136.75 – -136.79 (m), -136.80 – -136.87 (m), -136.88 – -136.92 (m). HRMS (ESI, *m/z*) calcd for C<sub>20</sub>H<sub>12</sub>F<sub>2</sub>N [M+H]<sup>+</sup>: 304.0932; found: 304.0926.

**2,3-dimethoxyindolo[1,2-f]phenanthridine (4d)**

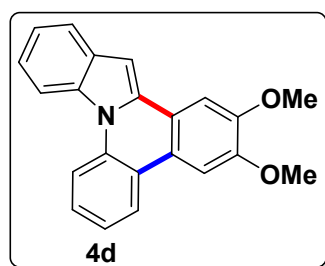

The reaction was performed following the general procedure. The residue was purified by flash column chromatograph (silica gel, petroleum ether:AcOEt = 8:1) to give the product as a pale yellow solid (55.6 mg, 85%).

<sup>1</sup>H NMR (500 MHz, CDCl<sub>3</sub>) δ 8.32 (d, *J* = 8.3 Hz, 1H), 8.29 – 8.21 (m, 1H), 7.90 – 7.81 (m, 1H), 7.81 – 7.72 (m, 1H), 7.43 – 7.30 (m, 3H), 7.19 (t, *J* = 7.5 Hz, 1H), 7.11 (s, 1H), 7.01 (s, 1H), 6.85 (s, 1H), 3.82 (d, *J* = 7.5 Hz, 6H). <sup>13</sup>C NMR (125 MHz, CDCl<sub>3</sub>) δ 149.4, 149.2, 135.1, 135.0, 133.5, 130.3, 127.3, 122.9, 122.3, 121.6, 121.5, 121.2, 120.4, 120.3, 119.4, 115.9, 114.2, 104.7, 103.4, 94.2, 55.6, 55.6. HRMS (ESI, *m/z*) calcd for C<sub>22</sub>H<sub>18</sub>NO<sub>2</sub> [M+H]<sup>+</sup>: 328.1332; found: 328.1334.

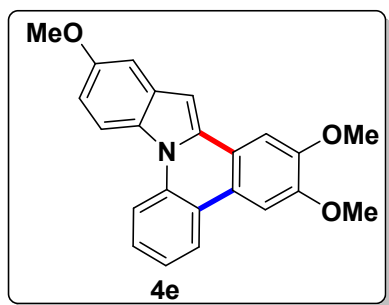

### 2,3,12-trimethoxyindolo[1,2-f]phenanthridine (4e)

The reaction was performed following the general procedure. The residue was purified by flash column chromatograph (silica gel, petroleum ether : AcOEt = 5:1) to give the product as a pale yellow solid (59.3 mg, 83%). <sup>1</sup>H NMR (500 MHz, CDCl<sub>3</sub>) δ 8.33 (d, *J* = 8.3 Hz, 1H), 8.17 (d, *J* = 9.1 Hz, 1H), 8.00 (dd, *J* = 8.2, 1.4 Hz, 1H), 7.44 (ddd, *J* = 8.5, 7.0, 1.5 Hz, 1H), 7.34 (s, 1H), 7.24 (d, *J* = 7.9 Hz, 1H), 7.22 – 7.15 (m, 2H), 6.97 (dd, *J* = 9.1, 2.6 Hz, 1H), 6.86 (s, 1H), 3.93 (s, 9H). <sup>13</sup>C NMR (125 MHz, CDCl<sub>3</sub>) δ 155.0, 149.7, 149.5, 135.7, 135.1, 131.4, 128.8, 127.5, 123.1, 122.4, 121.5, 120.4, 119.6, 115.7, 115.0, 111.0, 105.0, 103.7, 101.9, 94.0, 55.8, 55.6. HRMS (ESI, *m/z*) calcd for C<sub>23</sub>H<sub>20</sub>NO<sub>3</sub> [M+H]<sup>+</sup>: 358.1438; found: 328.1443.

### 12-chloro-2,3-dimethoxyindolo[1,2-f]phenanthridine (4f)

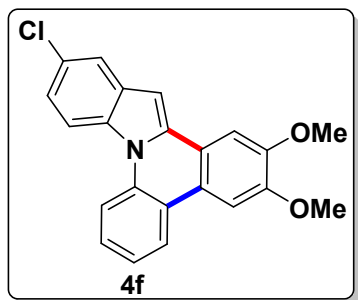

The reaction was performed following the general procedure. The residue was purified by flash column chromatograph (silica gel, petroleum ether : AcOEt = 5:1) to give the product as a pale yellow solid (47.7 mg, 66%). <sup>1</sup>H NMR (500 MHz, CDCl<sub>3</sub>) δ 8.40 (dd, *J* = 8.4, 1.1 Hz, 1H), 8.23 (d, *J* = 9.0 Hz, 1H), 8.14 (dd, *J* = 8.3, 1.5 Hz, 1H), 7.72 (d, *J* = 2.2 Hz, 1H), 7.56 – 7.49 (m, 2H), 7.38 – 7.33 (m, 2H), 7.28 (d, *J* = 2.2 Hz, 1H), 6.95 (s, 1H), 4.03 (d, *J* = 6.0 Hz, 6H). <sup>13</sup>C NMR (125 MHz, CDCl<sub>3</sub>) δ 150.0, 150.0, 136.4, 134.9, 132.0, 131.6, 127.9, 127.3, 123.4, 123.2, 121.9, 121.4, 120.8, 119.7, 119.4, 116.1, 115.1, 105.3, 104.0, 93.9, 56.0, 56.0. HRMS (ESI, *m/z*) calcd for C<sub>22</sub>H<sub>17</sub>ClNO<sub>2</sub> [M+H]<sup>+</sup>: 362.0942; found: 362.0950.

### 12-bromo-2,3-dimethoxyindolo[1,2-f]phenanthridine (4g)

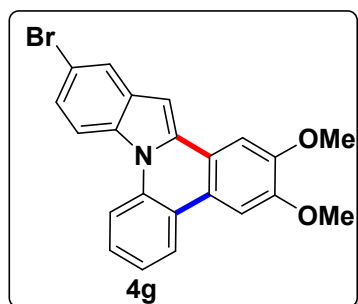

The reaction was performed following the general procedure. The residue was purified by flash column chromatograph (silica gel, petroleum ether : AcOEt = 5:1) to give the product as a pale yellow solid (56.8 mg,

70%).  $^1\text{H}$  NMR (500 MHz,  $\text{CDCl}_3$ )  $\delta$  8.40 (dd,  $J = 8.5, 1.1$  Hz, 1H), 8.19 (d,  $J = 8.9$  Hz, 1H), 8.15 (dd,  $J = 8.2, 1.5$  Hz, 1H), 7.88 (d,  $J = 2.1$  Hz, 1H), 7.57 – 7.50 (m, 2H), 7.40 (dd,  $J = 8.9, 2.1$  Hz, 1H), 7.38 – 7.34 (m, 2H), 6.95 (s, 1H), 4.03 (d,  $J = 5.7$  Hz, 6H).  $^{13}\text{C}$  NMR (125 MHz,  $\text{CDCl}_3$ )  $\delta$  150.1, 150.0, 136.3, 134.9, 132.3, 132.2, 127.9, 124.0, 123.4, 123.2, 122.9, 122.0, 120.8, 119.4, 116.2, 115.5, 115.0, 105.3, 104.0, 93.8, 56.0, 56.0. HRMS (ESI,  $m/z$ ) calcd for  $\text{C}_{22}\text{H}_{17}\text{BrNO}_2$   $[\text{M}+\text{H}]^+$ : 406.0437; found: 406.0437.

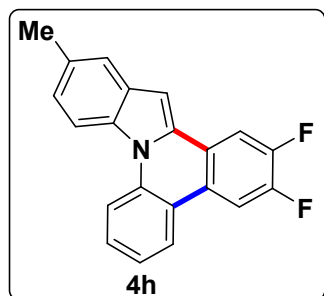

#### 2,3-difluoro-12-methylindolo[1,2-f]phenanthridine (4h)

The reaction was performed following the general procedure. The residue was purified by flash column chromatograph (silica gel, 100% petroleum) to give the product as a pale yellow solid (52.6 mg, 83%).  $^1\text{H}$  NMR (500 MHz,  $\text{CDCl}_3$ )  $\delta$  8.38 (dd,  $J = 8.5, 1.1$  Hz, 1H), 8.14 (d,  $J = 8.7$  Hz, 1H), 7.99 (dd,  $J = 8.1, 1.5$  Hz, 1H), 7.82 (dd,  $J = 11.9, 7.8$  Hz, 1H), 7.69 (dd,  $J = 10.9, 7.9$  Hz, 1H), 7.58 – 7.48 (m, 2H), 7.28 (ddd,  $J = 8.3, 7.2, 1.2$  Hz, 1H), 7.19 (dd,  $J = 8.7, 1.8$  Hz, 1H), 6.92 (s, 1H), 2.53 (s, 3H).  $^{13}\text{C}$  NMR (125 MHz,  $\text{CDCl}_3$ )  $\delta$  150.4 (dd,  $J = 251.3, 16.3$  Hz), 150.3, (dd,  $J = 251.3, 17.5$  Hz), 135.8, 133.4, 132.2, 131.5, 130.4, 129.1, 124.1, 124.0 (dd,  $J = 6.3, 2.5$  Hz), 123.9, 123.2 (dd,  $J = 6.3, 2.5$  Hz), 122.9, 120.8, 120.4, 116.2, 113.8, 111.9 (d,  $J = 17.5$  Hz), 110.9, (d,  $J = 18.8$  Hz), 96.2, 21.3.  $^{19}\text{F}$  NMR (471 MHz,  $\text{CDCl}_3$ )  $\delta$  -136.82, -136.87, -137.00, -137.05. HRMS (ESI,  $m/z$ ) calcd for  $\text{C}_{21}\text{H}_{14}\text{F}_2\text{N}$   $[\text{M}+\text{H}]^+$ : 318.1089; found: 318.1092.



### 12-(benzyloxy)-2,3-difluorindolo[1,2-f]phenanthridine (4i)

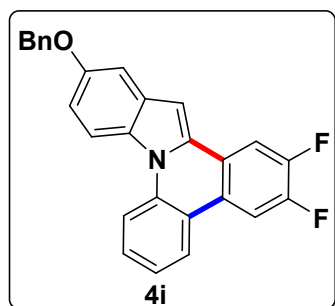

The reaction was performed following the general procedure. The residue was purified by flash column chromatograph (silica gel, petroleum ether : AcOEt = 8:1) to give the product as a pale yellow solid (70.3 mg, 86%).  $^1\text{H}$  NMR (500 MHz,  $\text{CDCl}_3$ )  $\delta$  8.30 – 8.21 (m, 1H), 8.09 (d,  $J = 9.2$  Hz, 1H), 7.91 (dd,  $J = 8.2, 1.5$  Hz, 1H), 7.74 (dd,  $J = 11.8, 7.8$  Hz, 1H), 7.66 – 7.51 (m, 3H), 7.51 – 7.41 (m, 3H), 7.41 – 7.32 (m, 1H), 7.26 – 7.22 (m, 1H), 7.21 (d,  $J = 2.6$  Hz, 1H), 7.06 (dd,  $J = 9.2, 2.6$  Hz, 1H), 6.80 (s, 1H), 5.17 (s, 2H).  $^{13}\text{C}$  NMR (125 MHz,  $\text{CDCl}_3$ )  $\delta$  154.4, 150.4 (dd,  $J = 250.0, 13.8$  Hz), 150.2 (dd,  $J = 250.0, 13.8$  Hz), 137.4, 135.5, 133.8, 130.9, 129.1, 129.0, 128.6, 127.9, 127.6, 123.8, 123.8 (dd,  $J = 7.5, 3.8$  Hz), 122.9, 122.8 (dd,  $J = 7.5, 3.8$  Hz), 120.2, 115.8, 115.0, 113.0, 111.8 (dd,  $J = 18.1, 2.5$  Hz), 110.8 (d,  $J = 18.8$  Hz), 103.5, 96.2, 70.5.  $^{19}\text{F}$  NMR (471 MHz,  $\text{CDCl}_3$ )  $\delta$  -136.75, -136.80, -136.87, -136.91. HRMS (ESI,  $m/z$ ) calcd for  $\text{C}_{27}\text{H}_{18}\text{F}_2\text{NO}$   $[\text{M}+\text{H}]^+$ : 410.1351; found: 410.1357.

### benzo[6,7]naphtho[1',8':3,4,5]azepino[1,2-a]indole (4j)

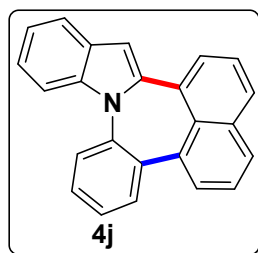

The reaction was performed following the general procedure. The residue was purified by flash column chromatograph (silica gel, 100% petroleum) to give the product as a bright yellow solid (29.1 mg, 46%).  $^1\text{H}$  NMR (500 MHz,  $\text{CDCl}_3$ )  $\delta$  8.04 (dd,  $J = 7.2, 1.2$  Hz, 1H), 7.83 (dd,  $J = 8.1, 1.3$  Hz, 1H), 7.80 – 7.68 (m, 4H), 7.59 (d,  $J = 7.7$  Hz, 1H), 7.51 (t,  $J = 7.6$  Hz, 1H), 7.45 (t,  $J = 7.6$  Hz, 1H), 7.37 (td,  $J = 7.7, 1.7$  Hz, 1H), 7.28 (td,  $J = 7.6, 1.3$  Hz, 1H), 7.21 (ddd,  $J = 15.4, 8.1, 1.5$  Hz, 2H), 7.14 (t,  $J = 7.4$  Hz, 1H), 6.52 (s, 1H).  $^{13}\text{C}$  NMR (125 MHz,  $\text{CDCl}_3$ )  $\delta$  143.1, 137.6, 136.8, 135.7, 135.7, 135.0, 133.5, 133.40, 130.2, 128.8, 128.4, 128.1, 128.0, 127.2, 126.6, 126.1, 125.9, 124.6, 124.3, 122.4, 121.1, 120.7, 112.6, 107.4. HRMS (ESI,  $m/z$ ) calcd for  $\text{C}_{24}\text{H}_{16}\text{N}$   $[\text{M}+\text{H}]^+$ : 318.1277; found: 318.1273.



## 5. NMR spectroscopic data

### indolo[1,2-f]phenanthridine (3a)

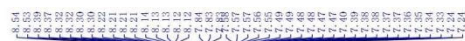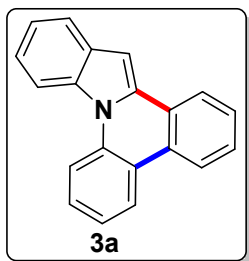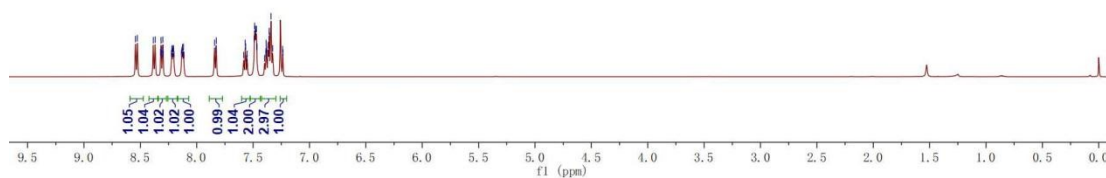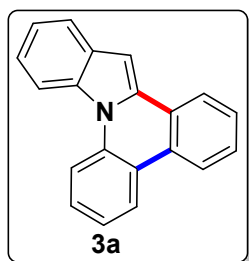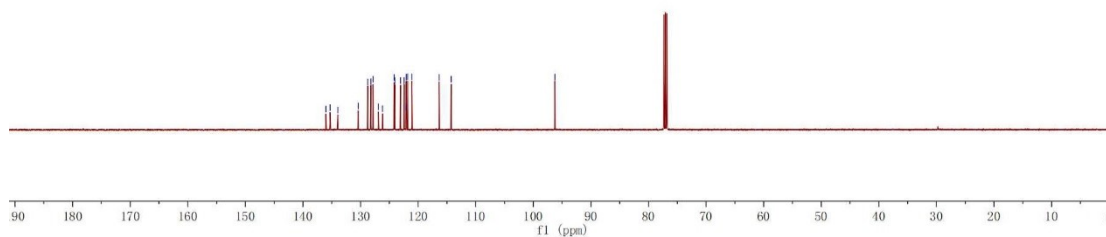

# 14-methylindolo[1,2-f]phenanthridine (3b)

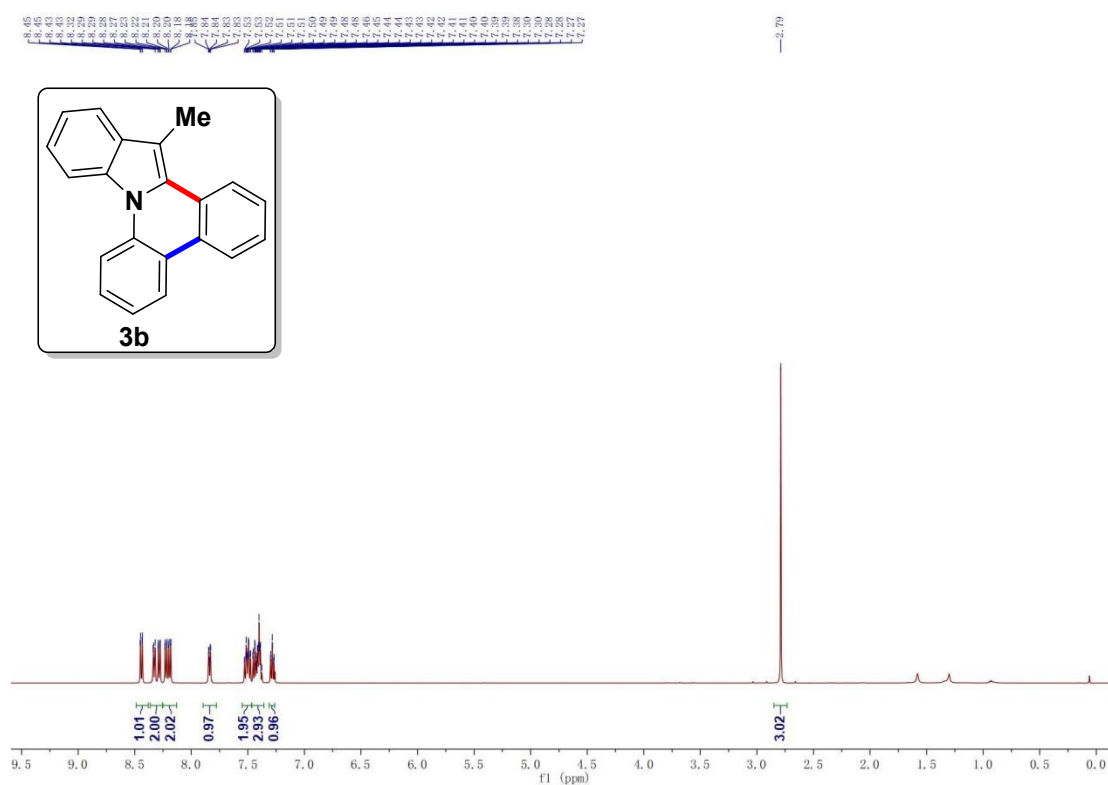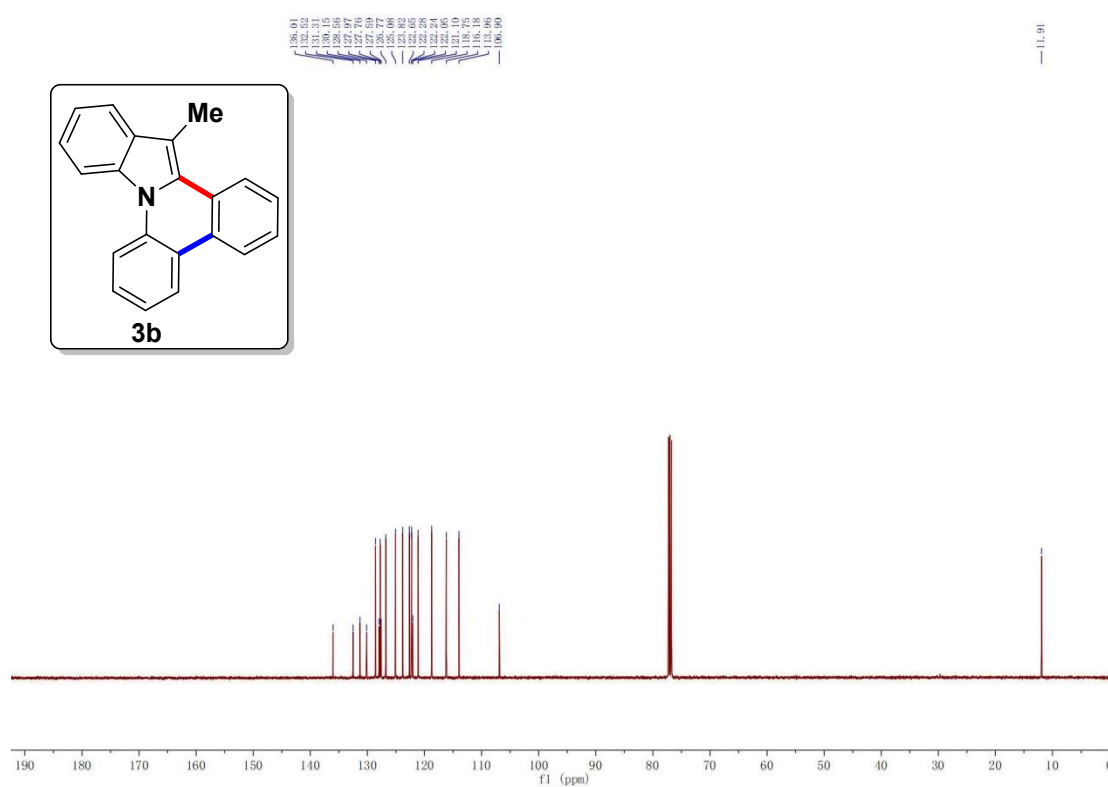

### 13-methylindolo[1,2-f]phenanthridine (3c)

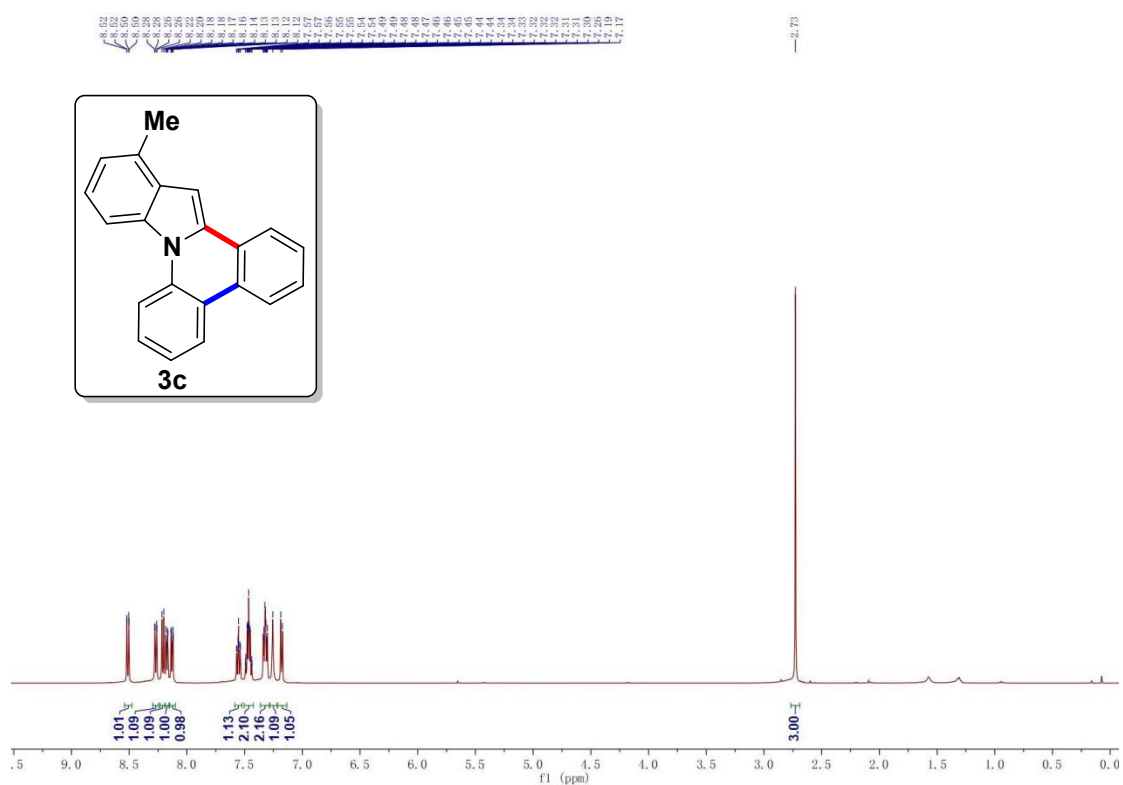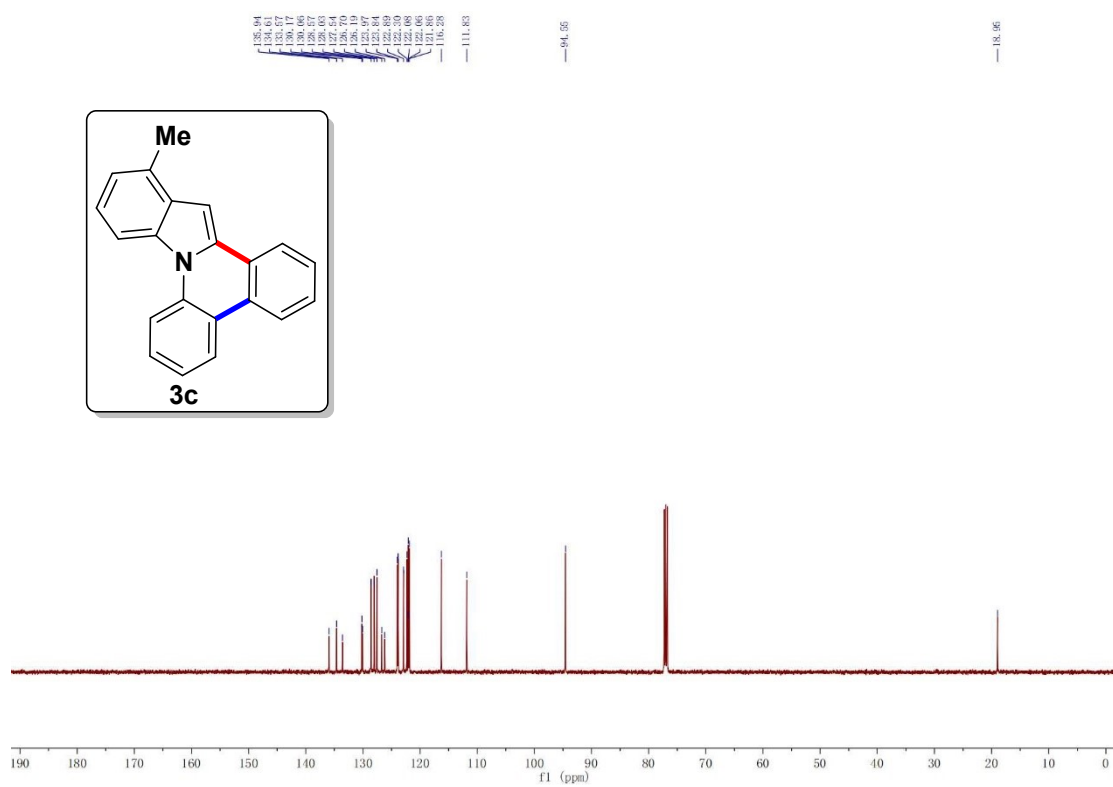

### 12-methylindolo[1,2-f]phenanthridine (3d)

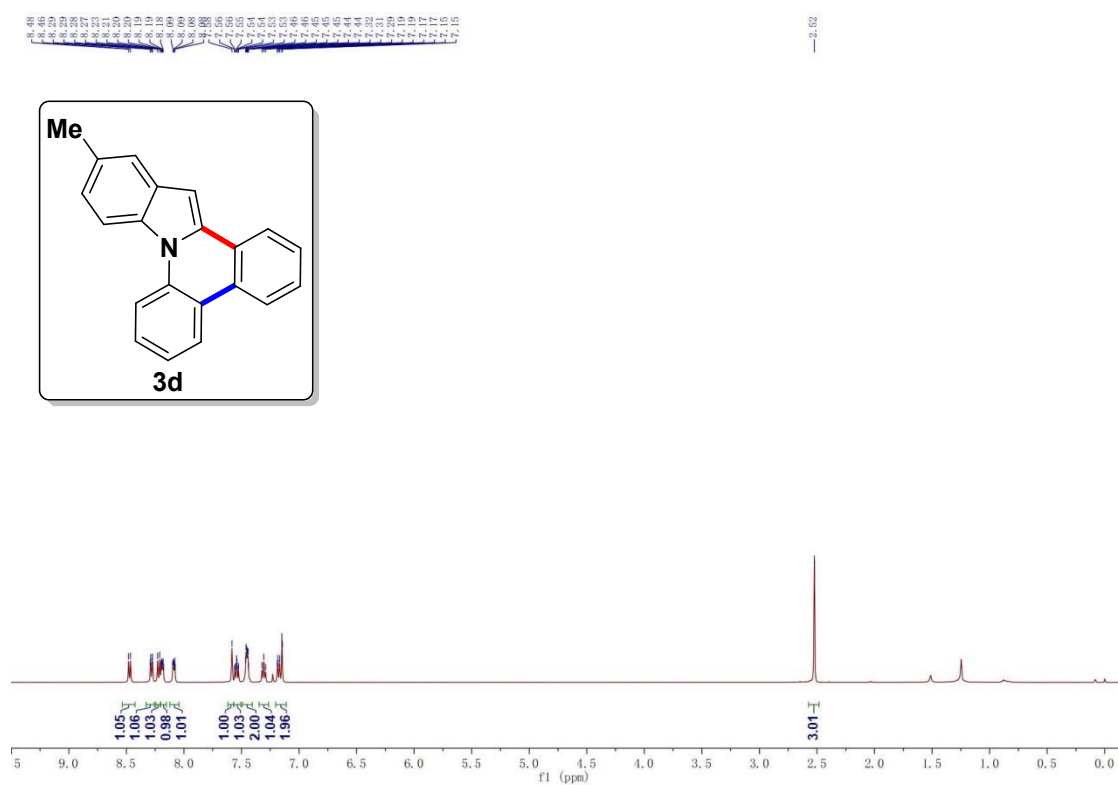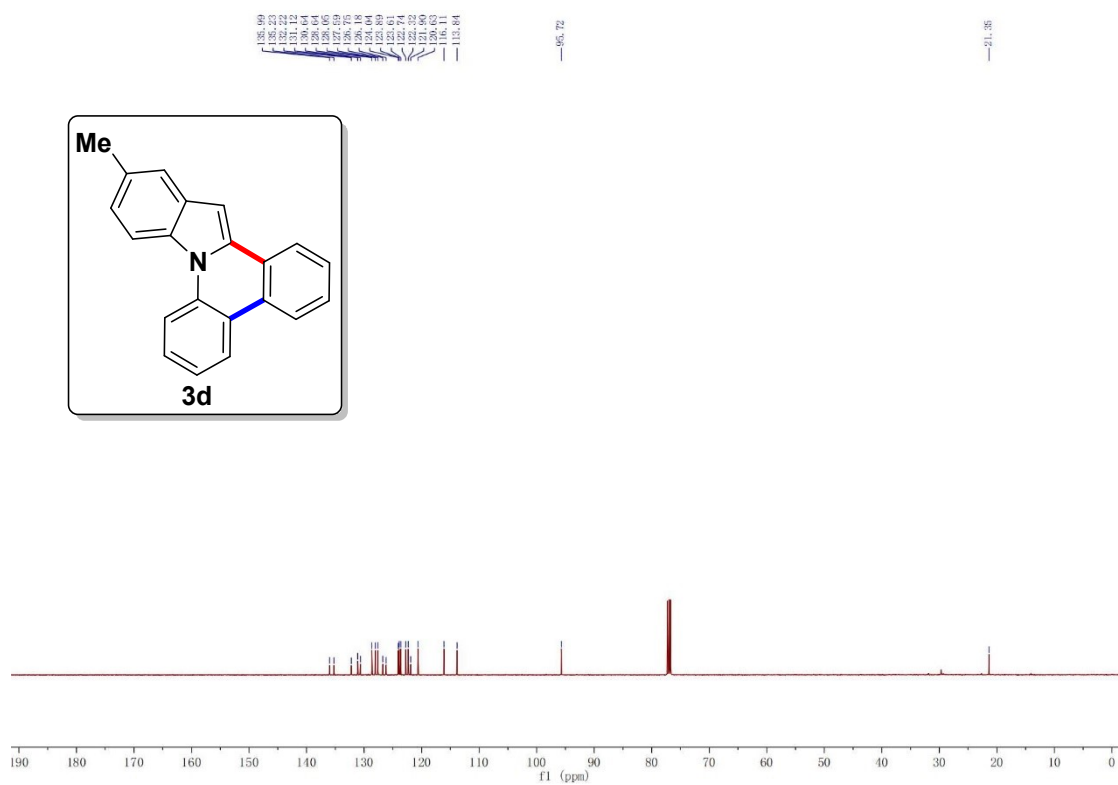

# 11-methylindolo[1,2-f]phenanthridine (3e)

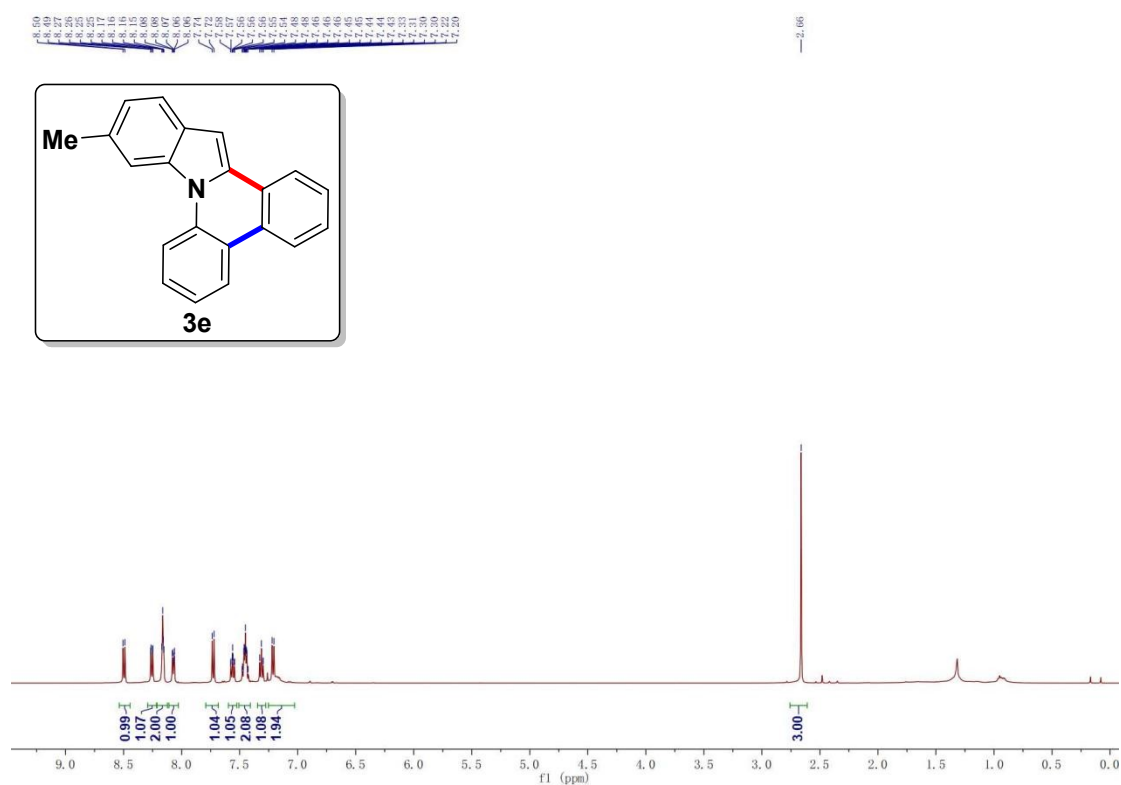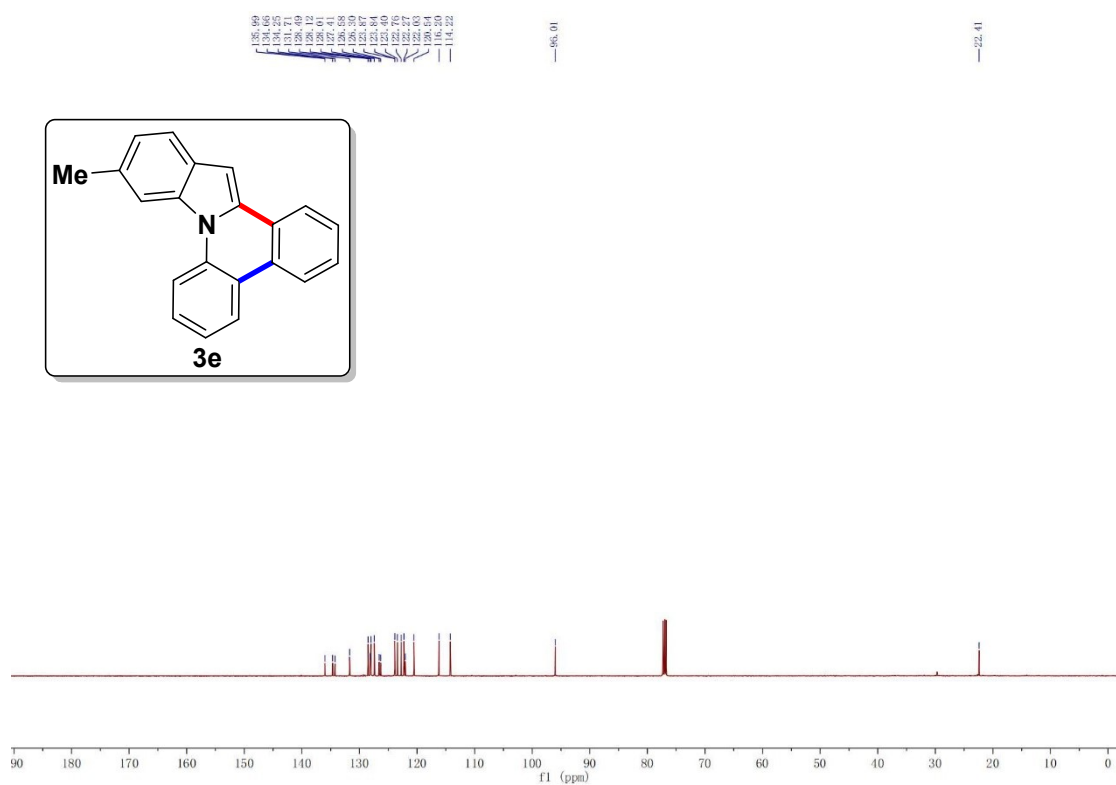

# 10-methylindolo[1,2-f]phenanthridine (3f)

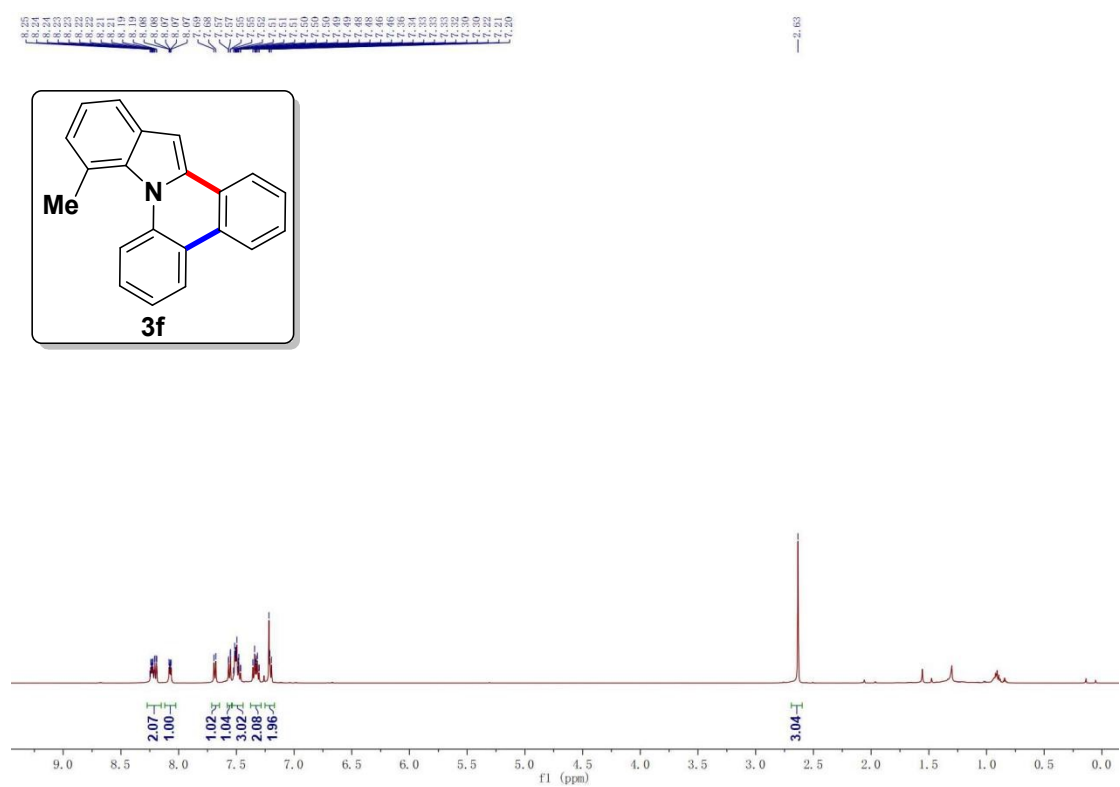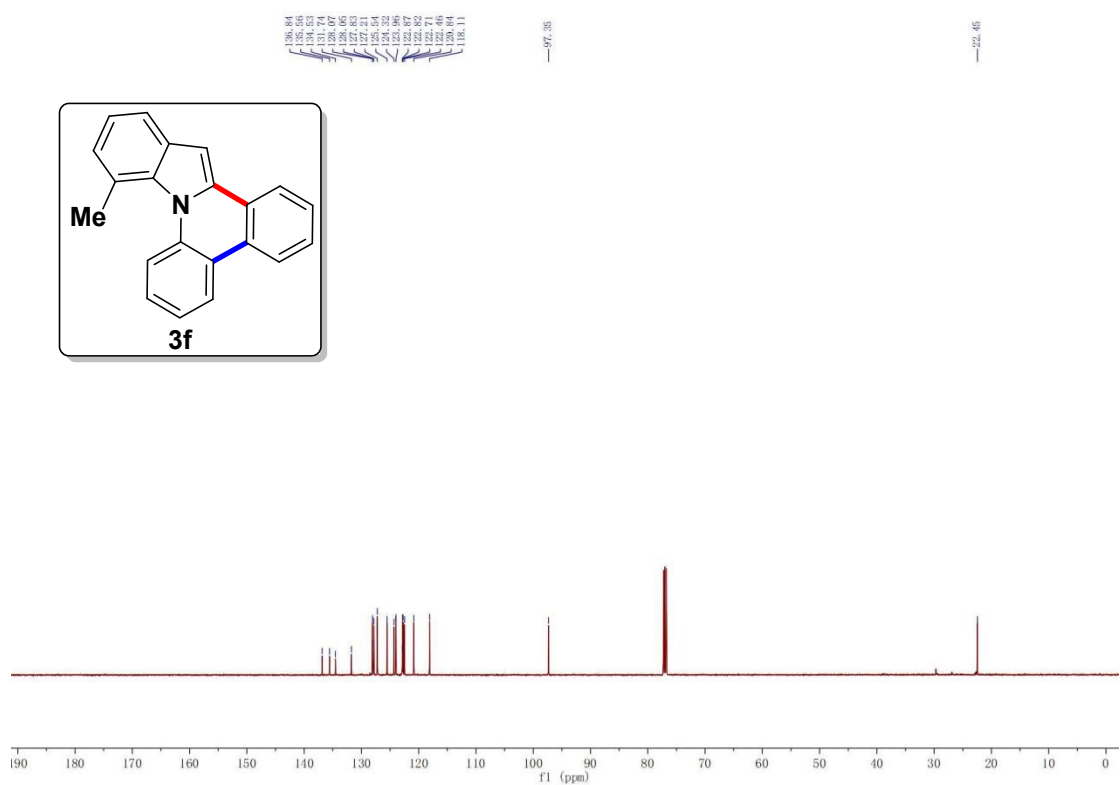

Chemical structure of compound **3g** is shown, which is a tricyclic indole derivative. The structure features a methoxy group (MeO) and is labeled **3g**.

The  $^1\text{H}$  NMR spectrum (CDCl<sub>3</sub>) shows the following peaks and integrations:

- Aromatic region (7.0–8.5 ppm): Multiple peaks with integrations of 1.00, 1.01, 1.00, 0.98, 1.02, 1.01, 1.01, 0.98, and 0.98.
- Methoxy singlet (3.94 ppm): Integration of 2.98.

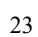

## 12-(benzyloxy)indolo[1,2-f]phenanthridine (3h)

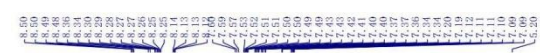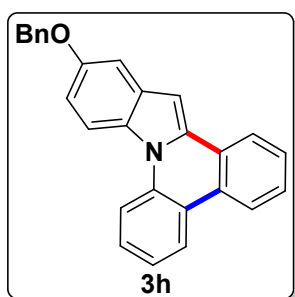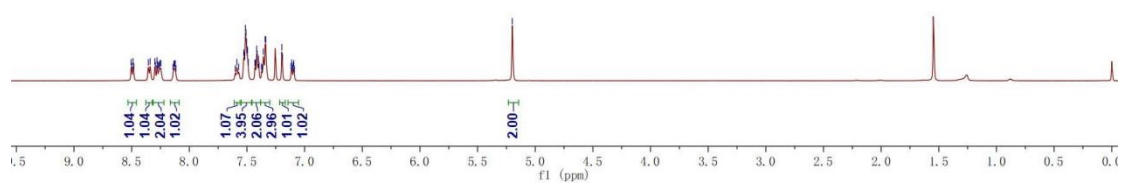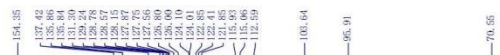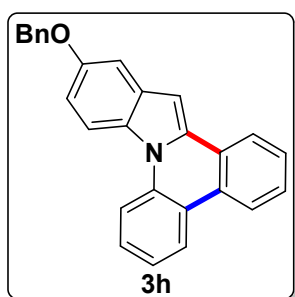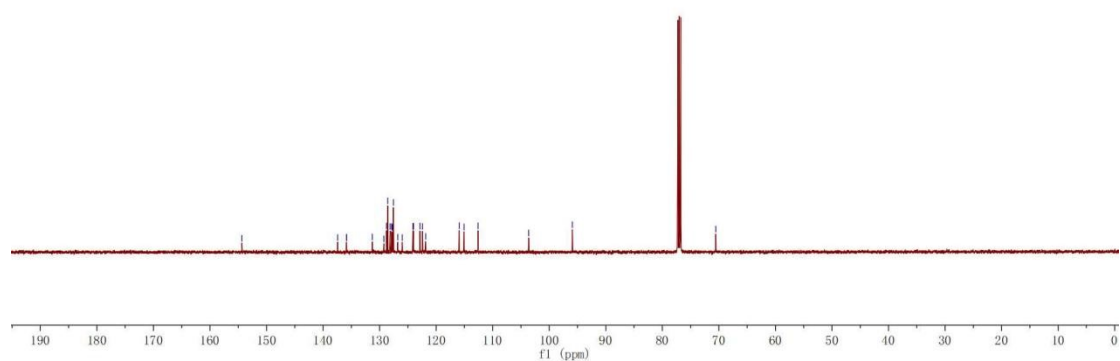



# 12-fluoroindolo[1,2-f]phenanthridine (3i)

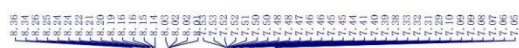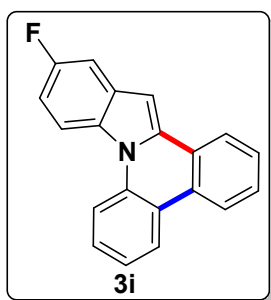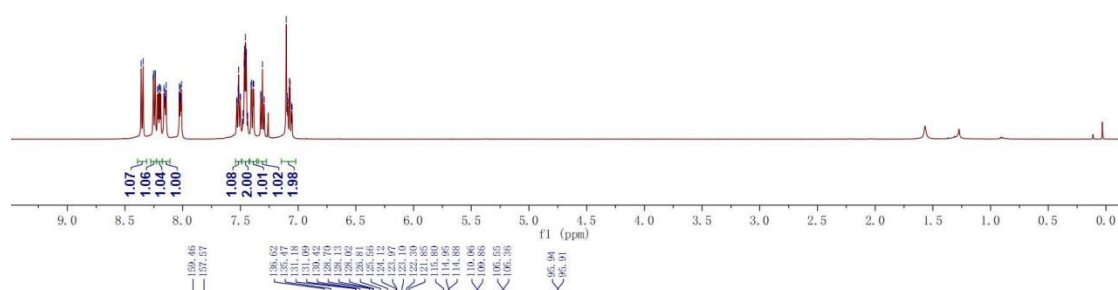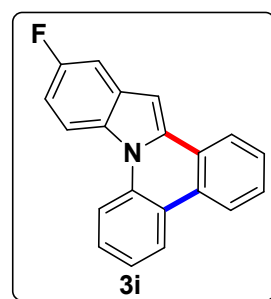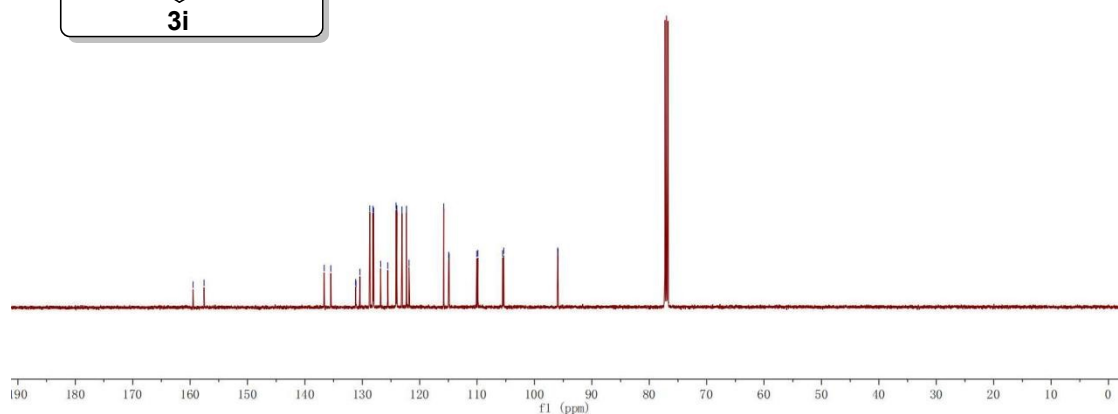

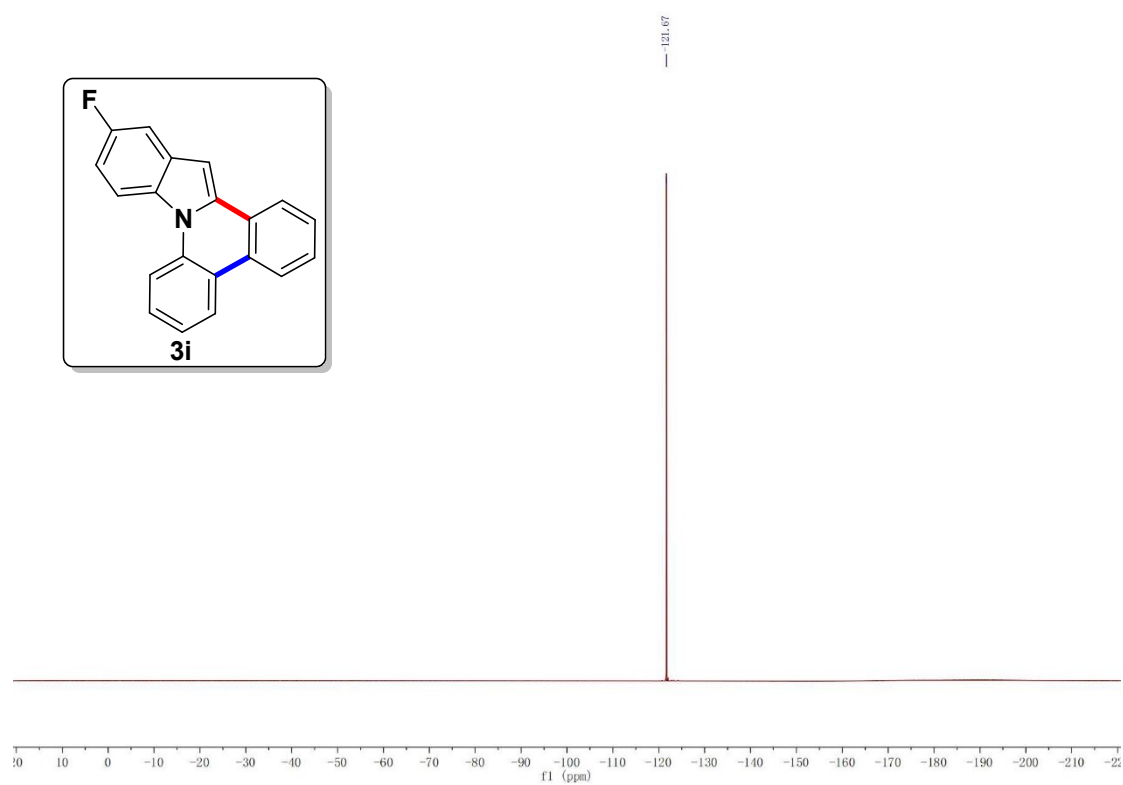

# 12-chloroindolo[1,2-f]phenanthridine (3j)

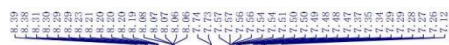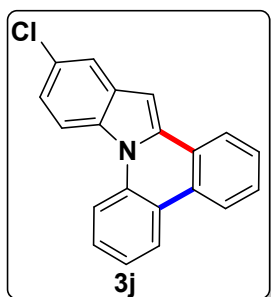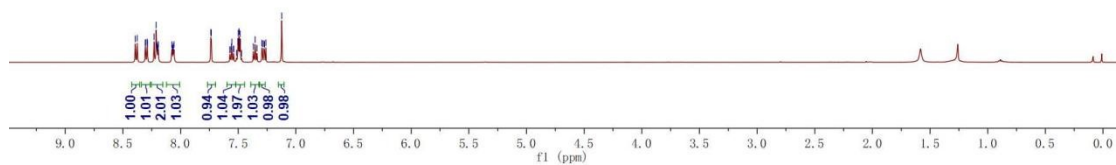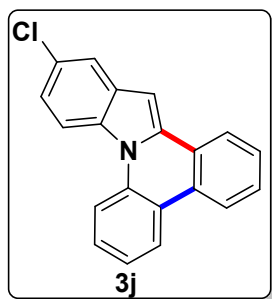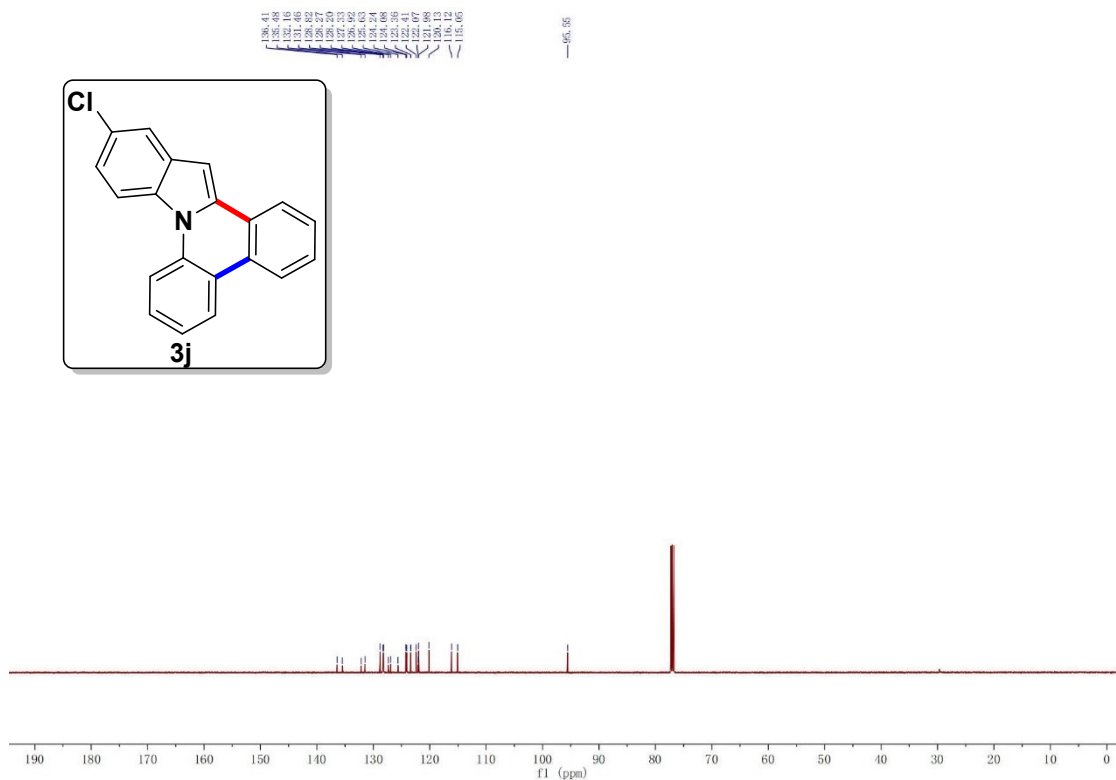

### 12-bromoindolo[1,2-f]phenanthridine (3k)

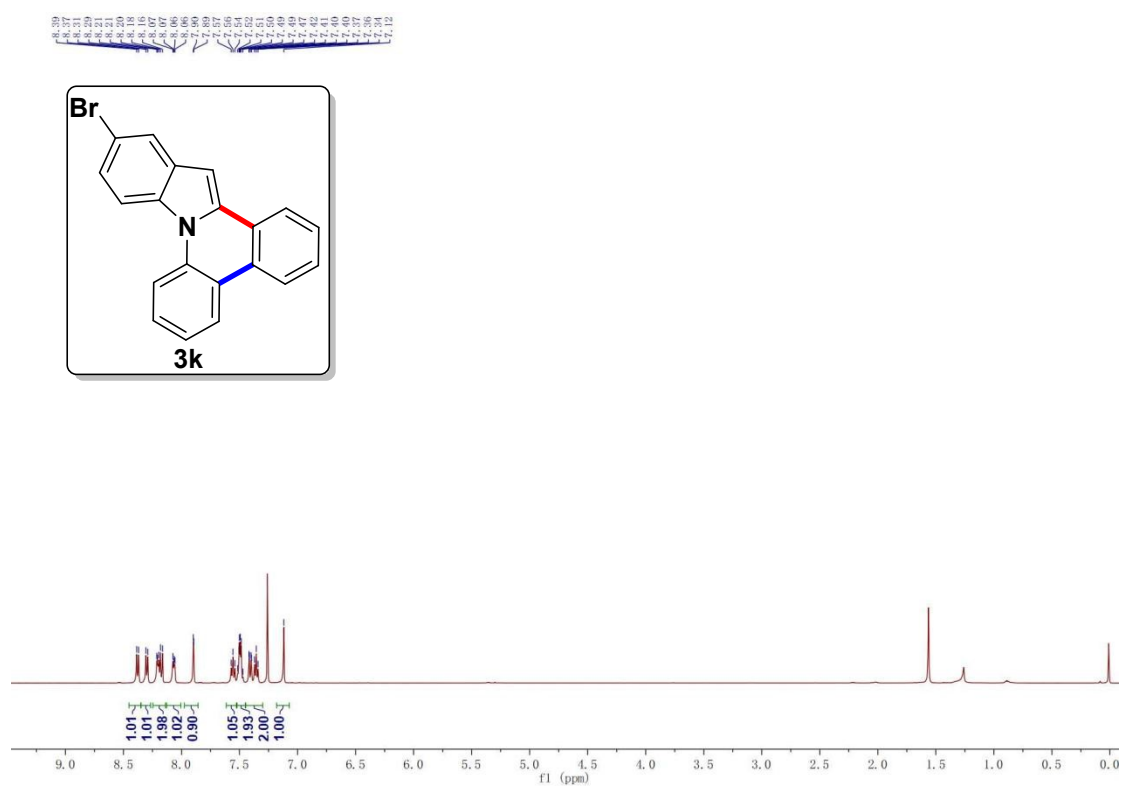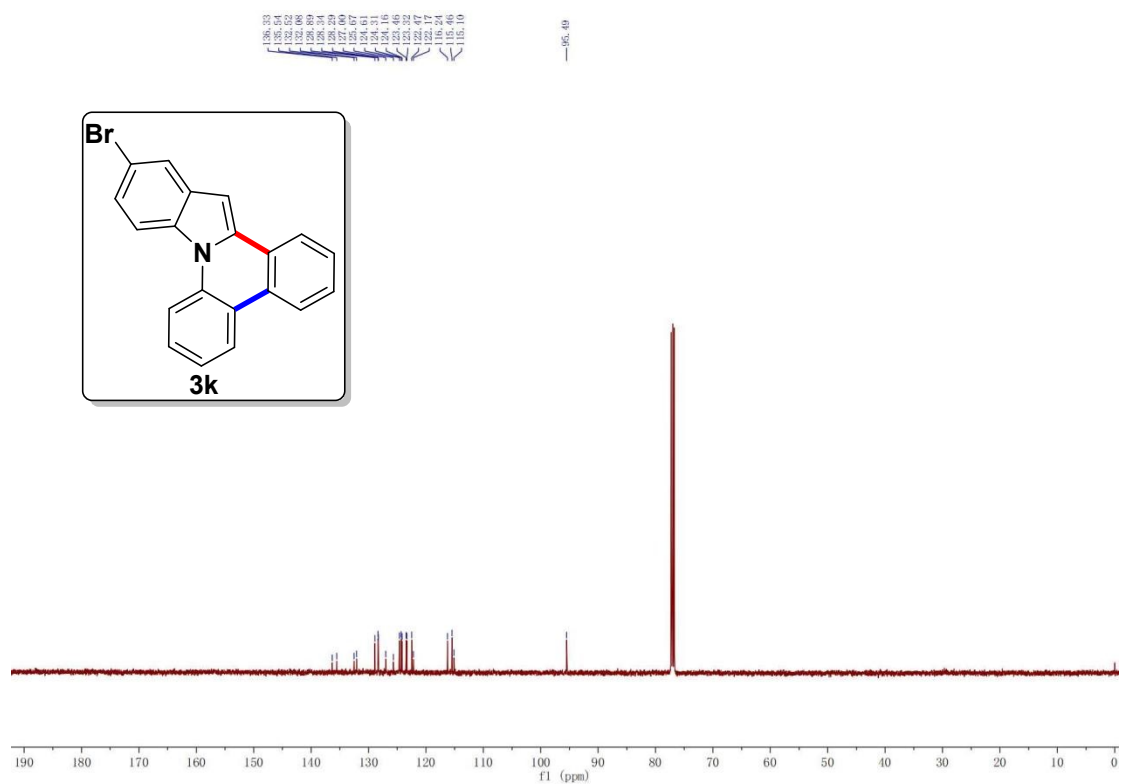

# 13-fluoroindolo[1,2-f]phenanthridine (3I)

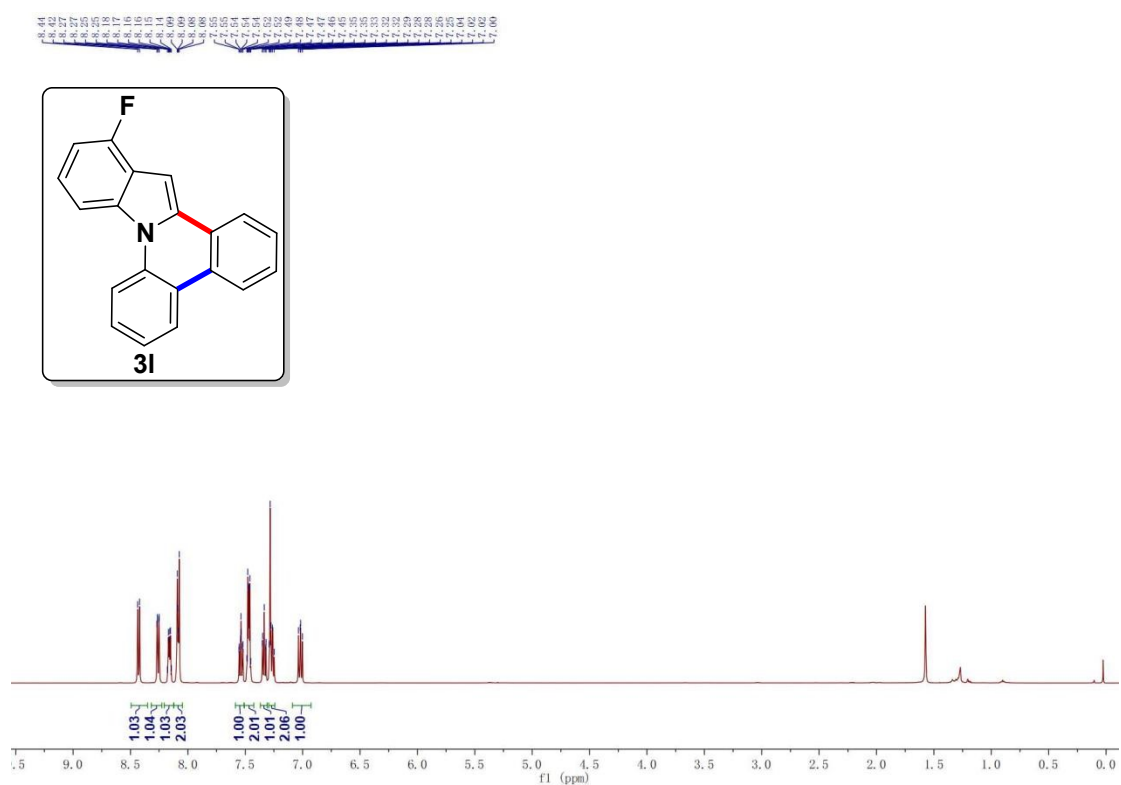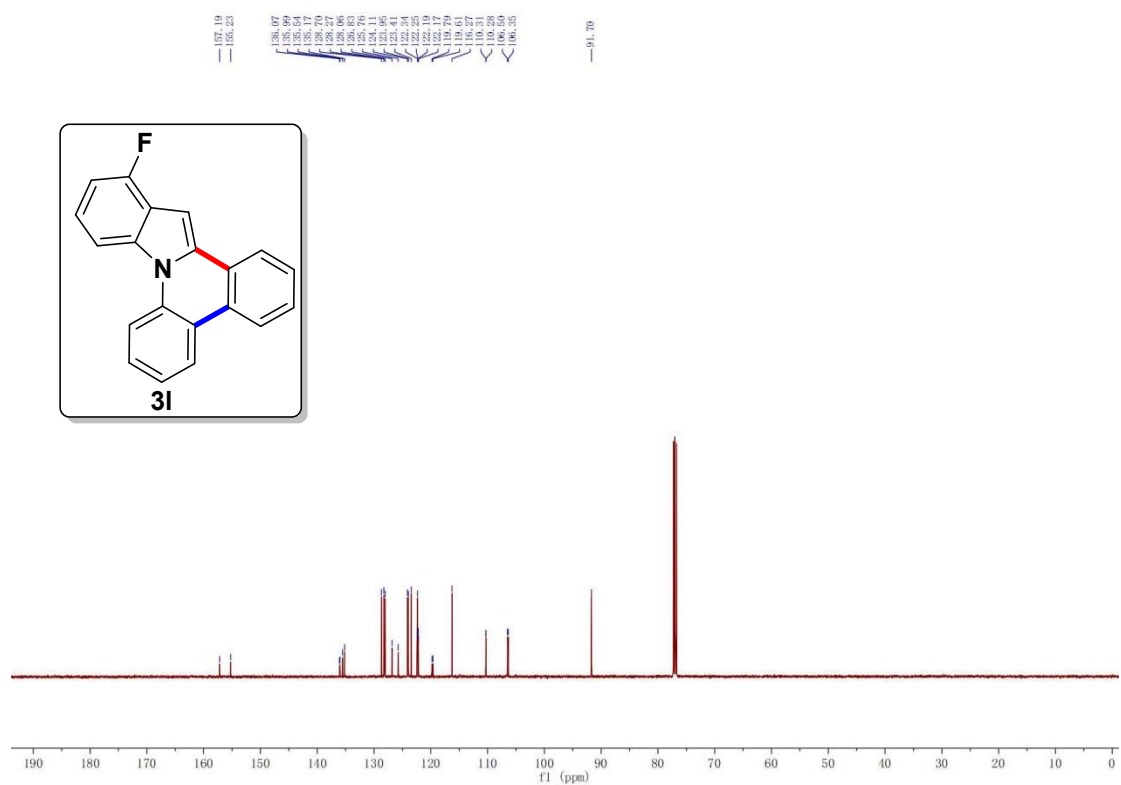

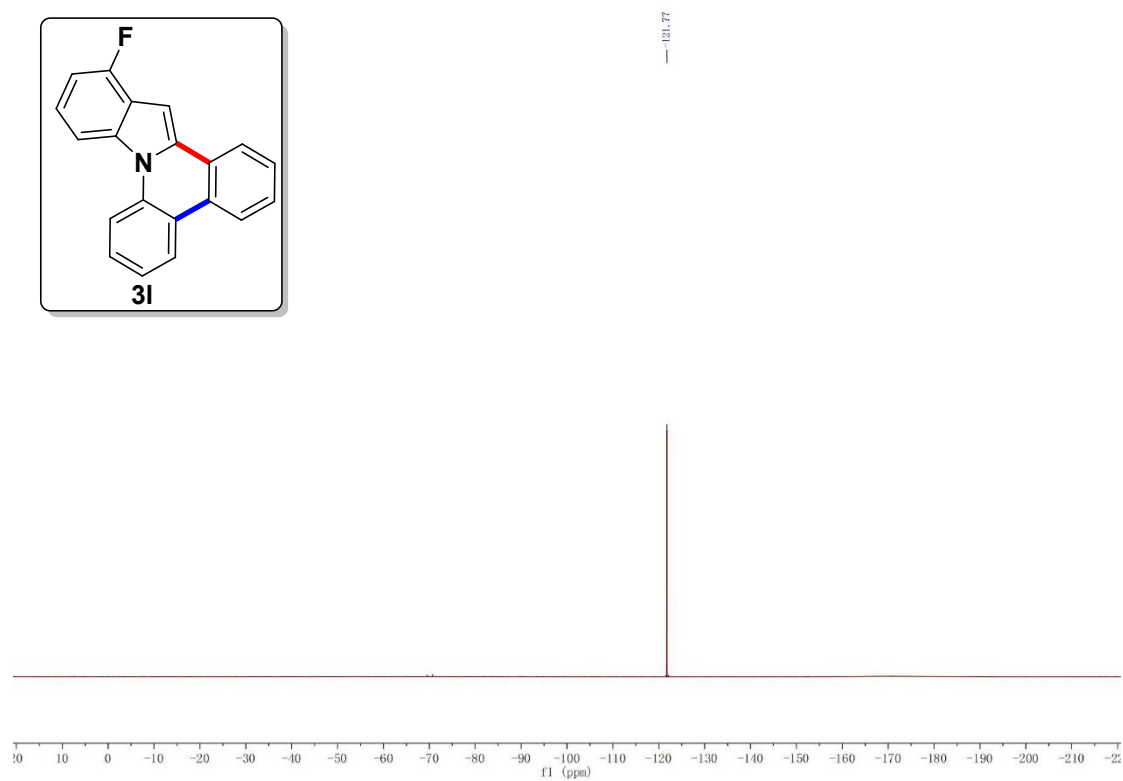

# 13-bromoindolo[1,2-f]phenanthridine (3m)

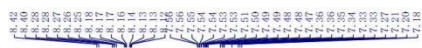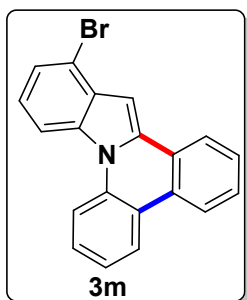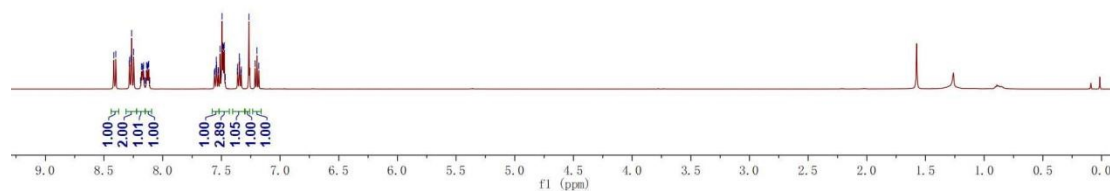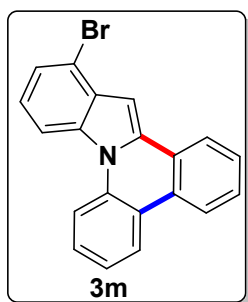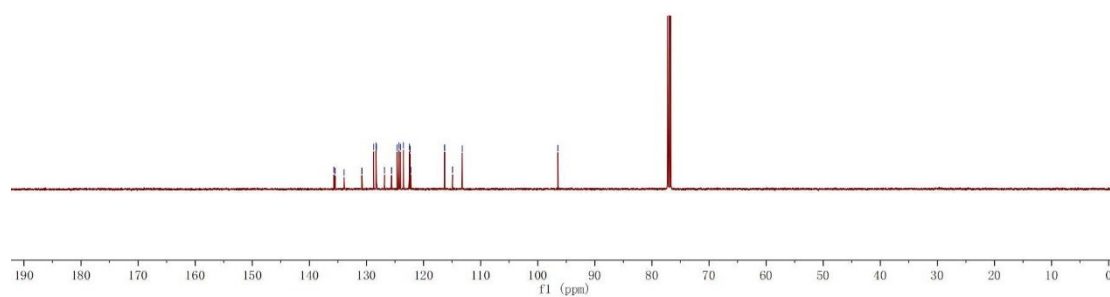

[illegible]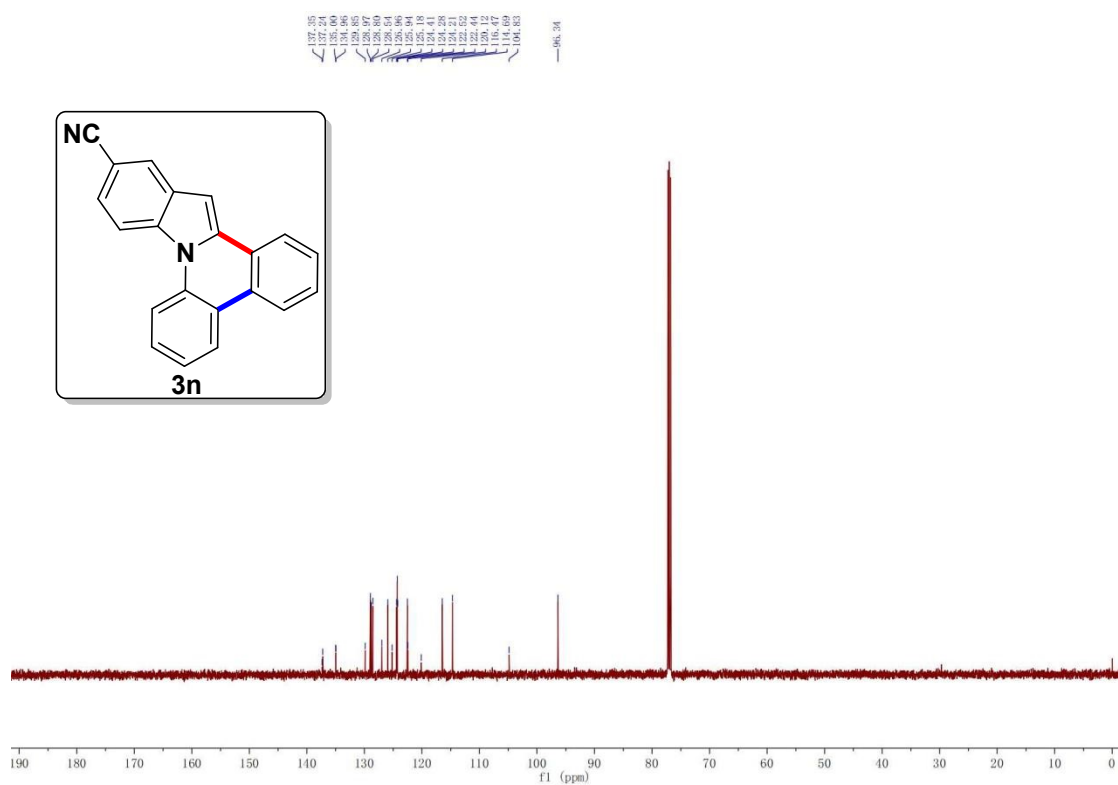



**methyl indolo[1,2-f]phenanthridine-12-carboxylate (3o)**

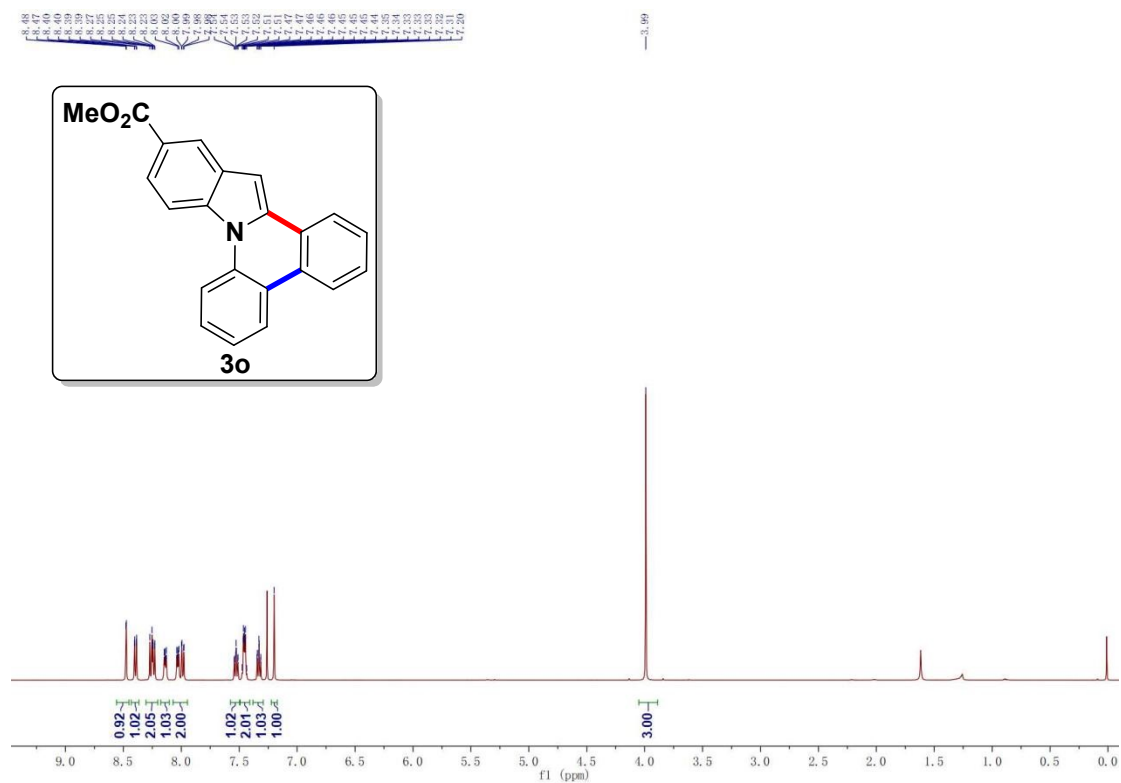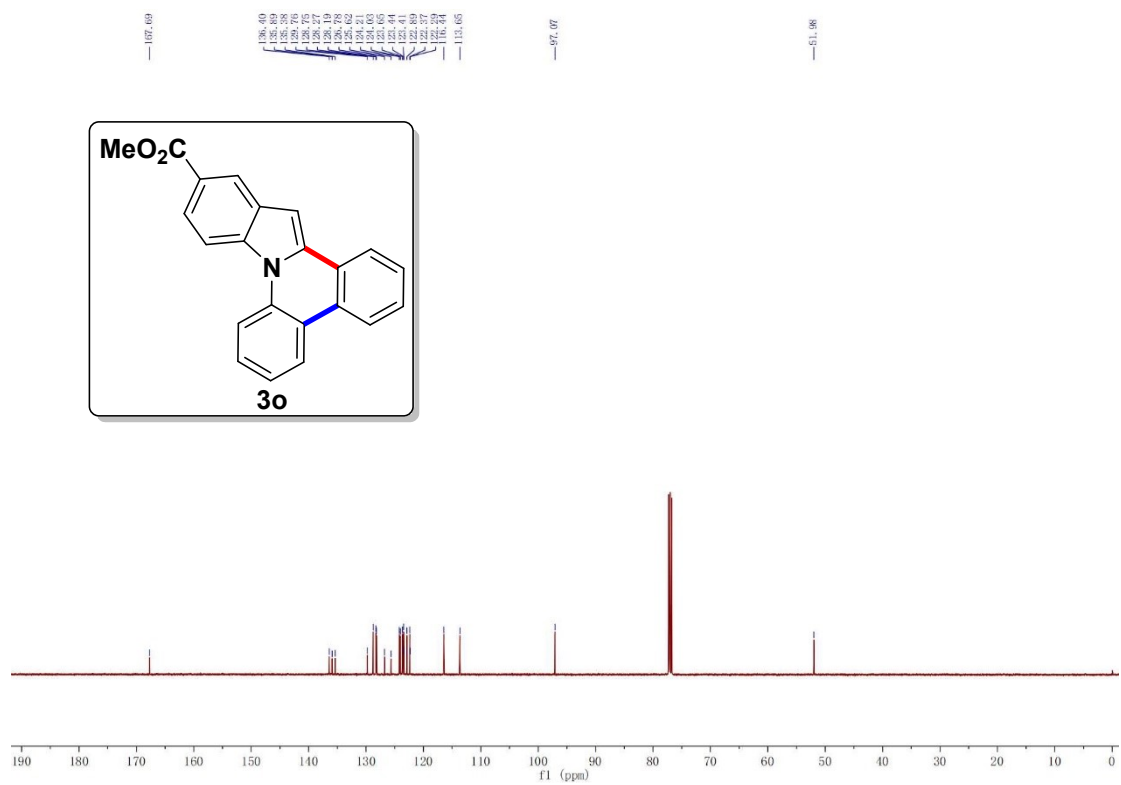

# 11-(trifluoromethyl)indolo[1,2-f]phenanthridine (3p)

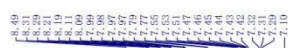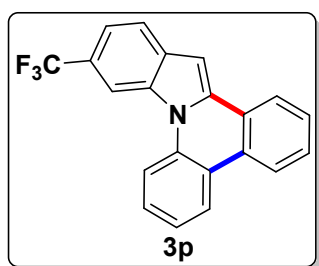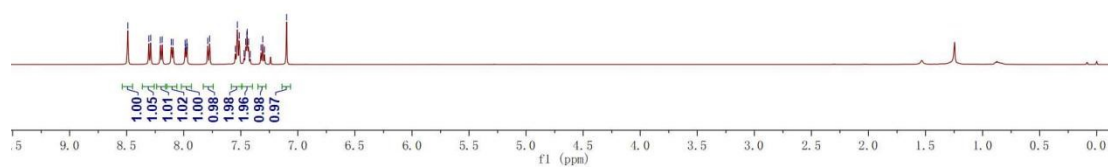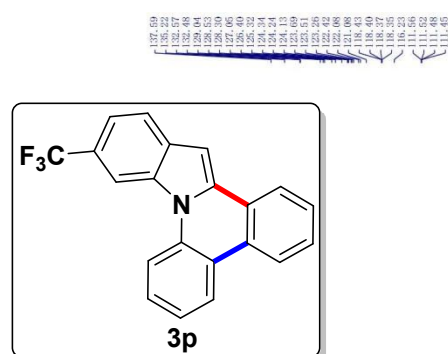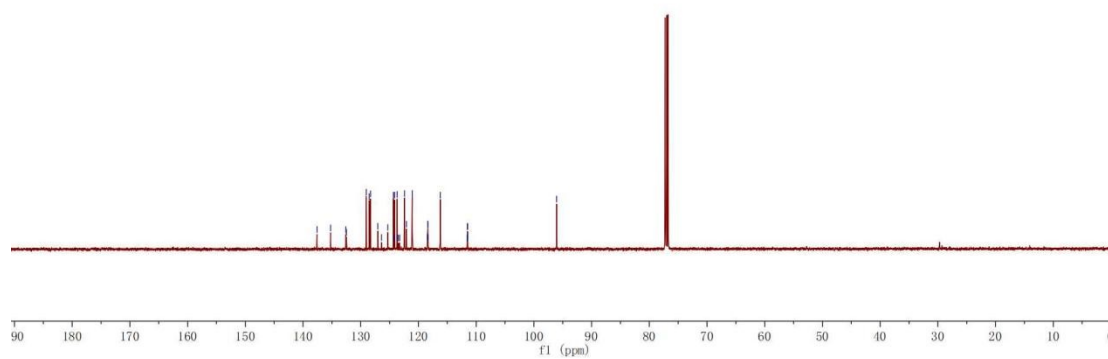

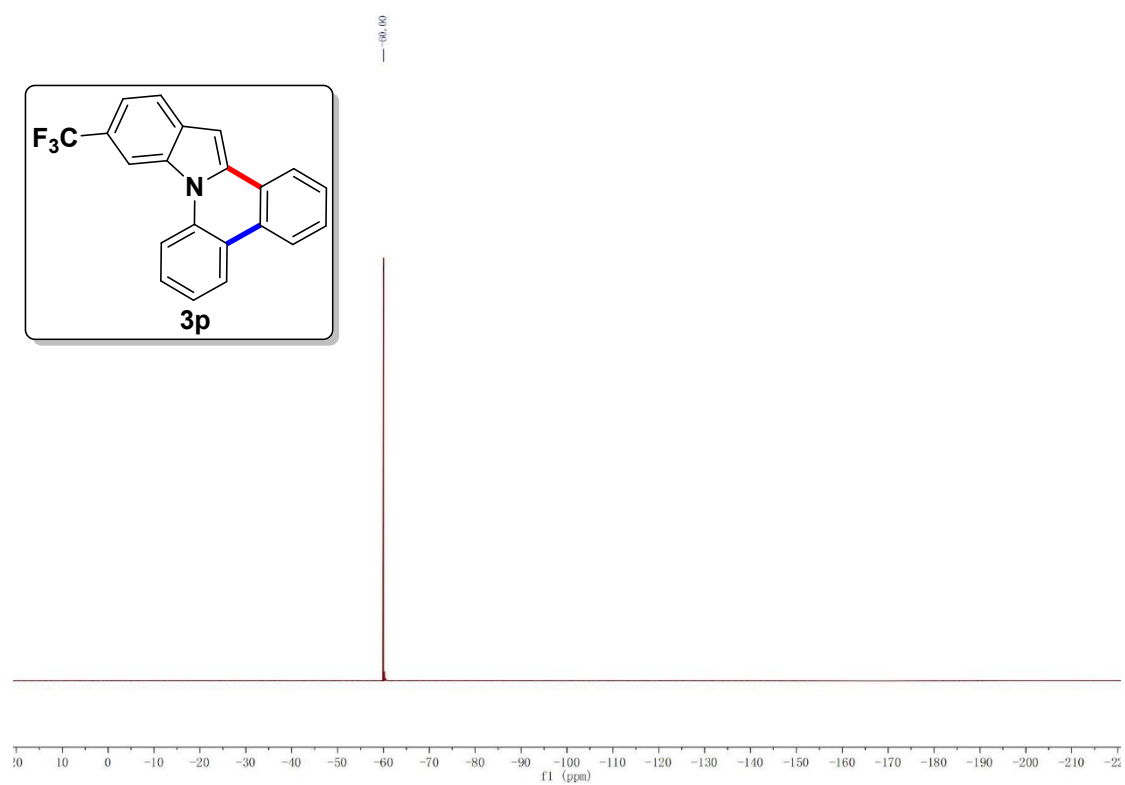

# 1-(indolo[1,2-f]phenanthridin-14-yl)ethan-1-one (3q)

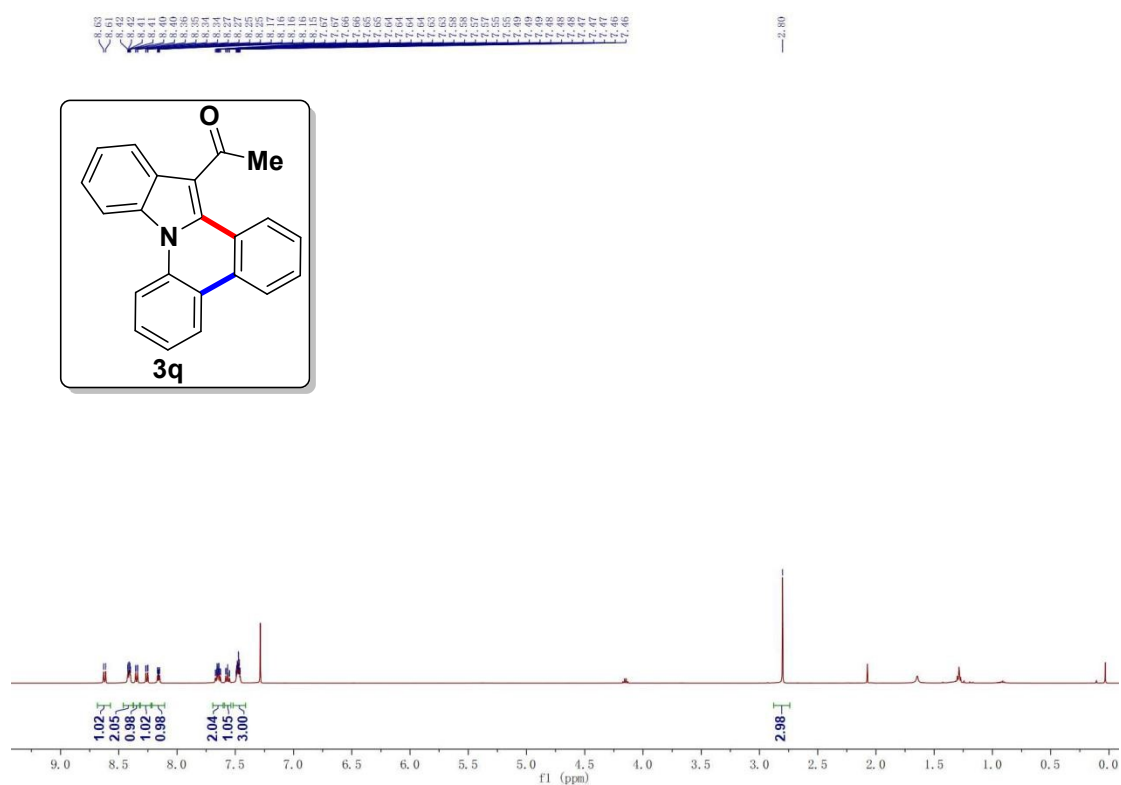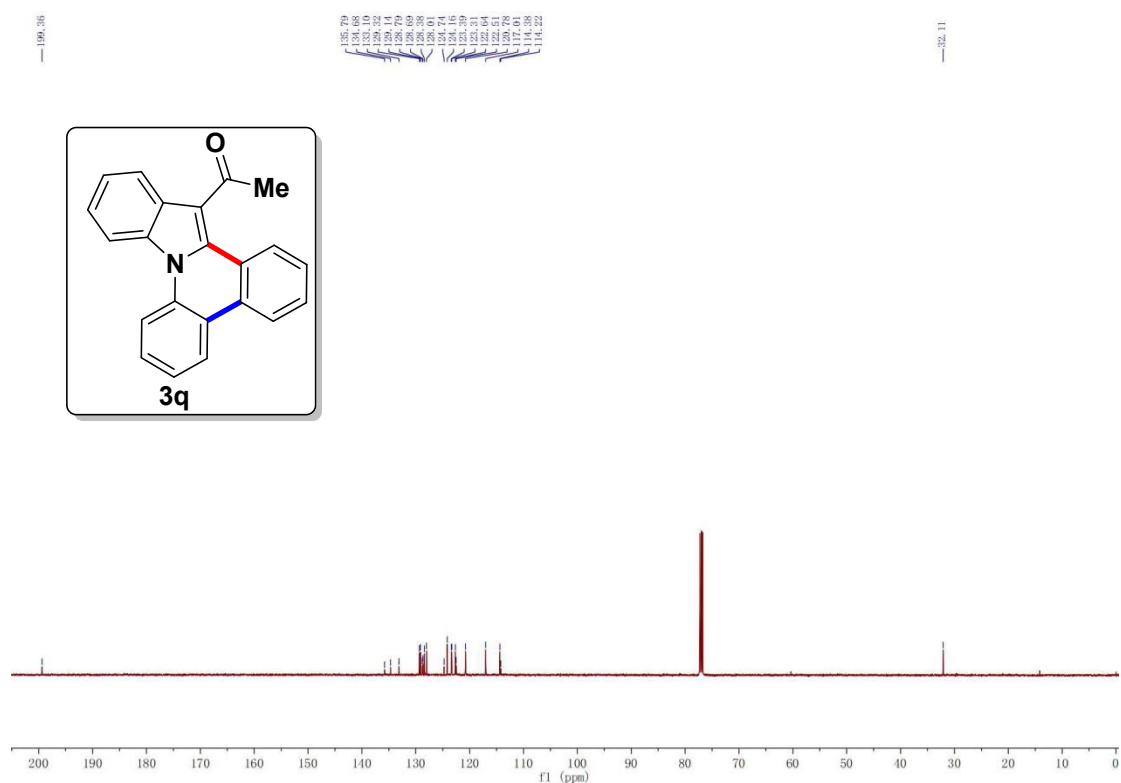

**benzo[4,5]imidazo[1,2-f]phenanthridine (3r)**

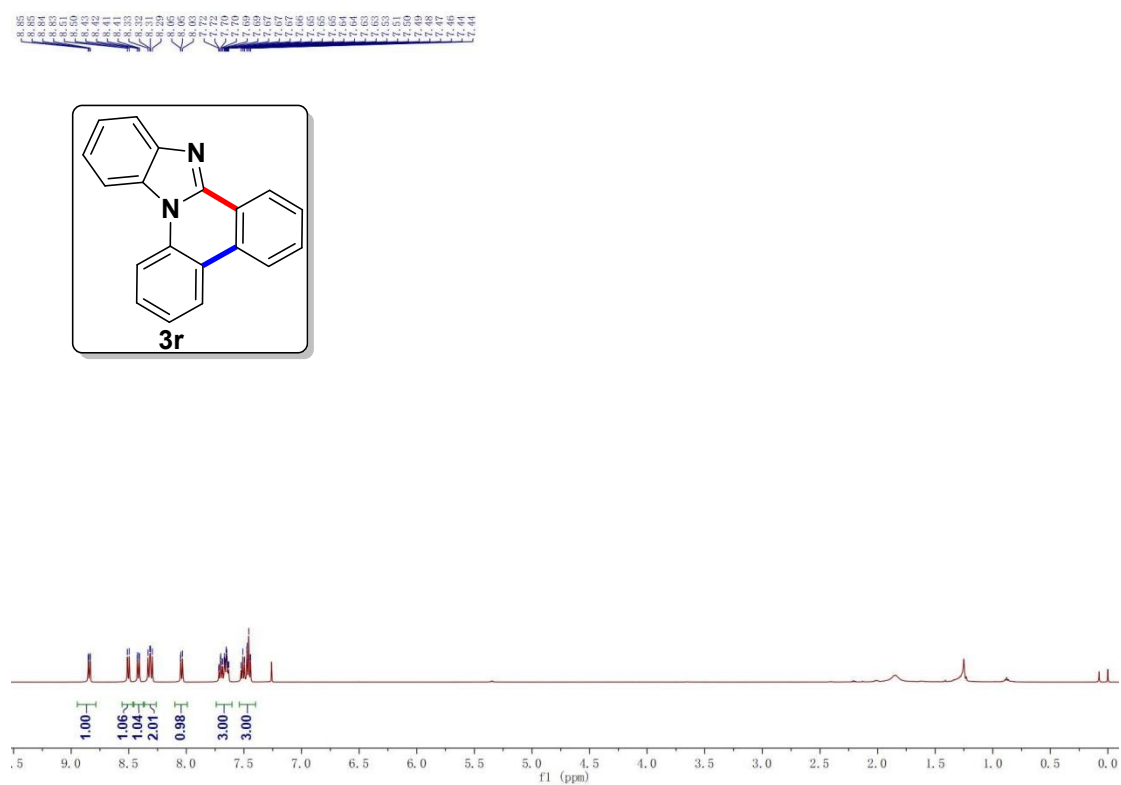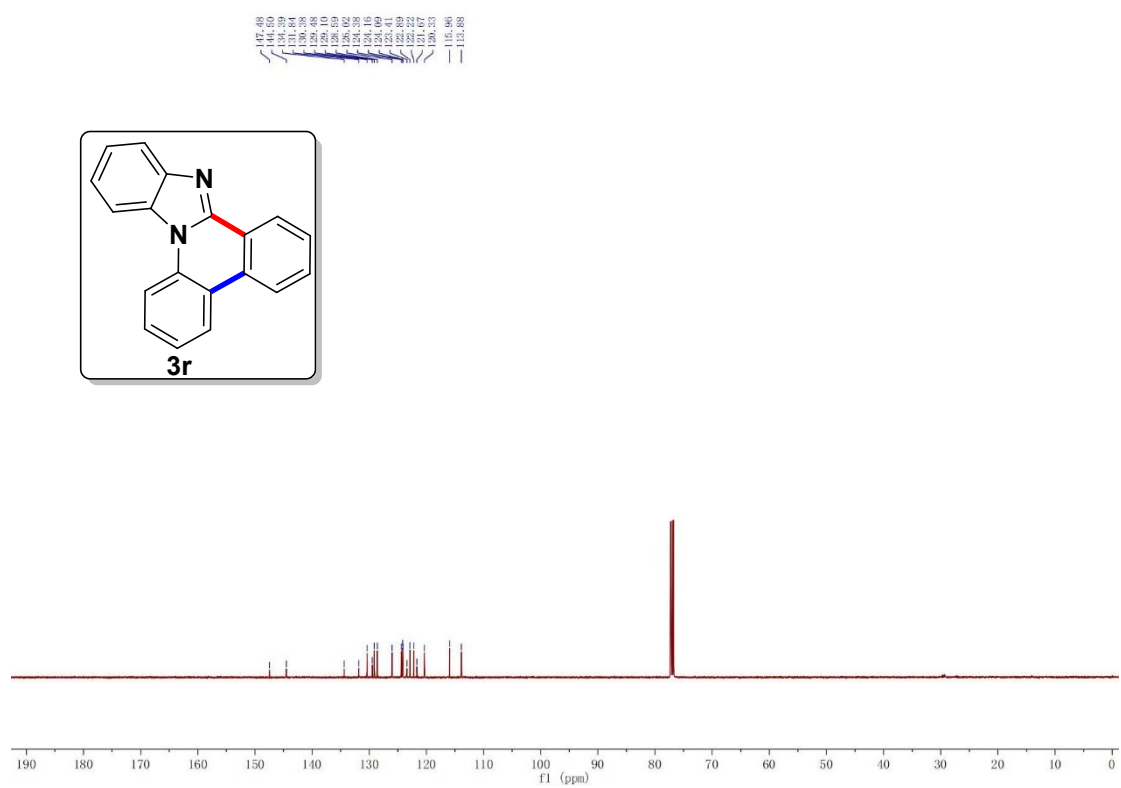

11-methylbenzo[4,5]imidazo[1,2-f]phenanthridine (3s) and 12-methylbenzo[4,5]imidazo[1,2-f]phenanthridine (3s')

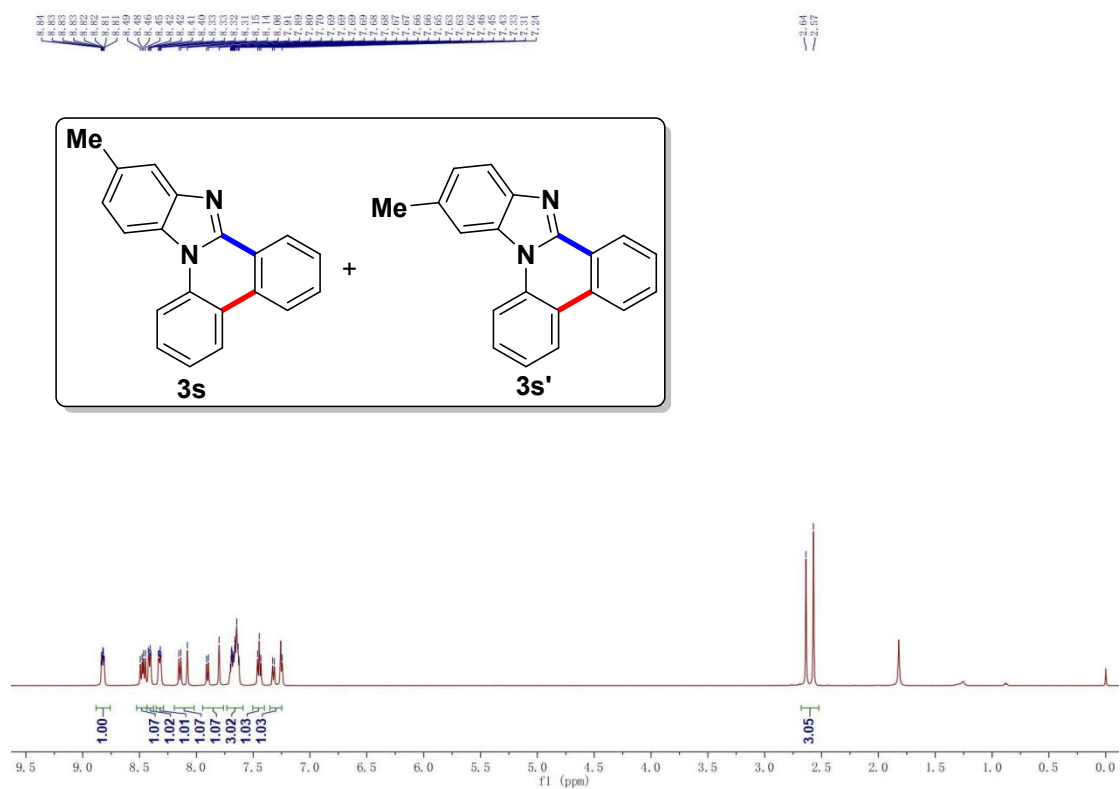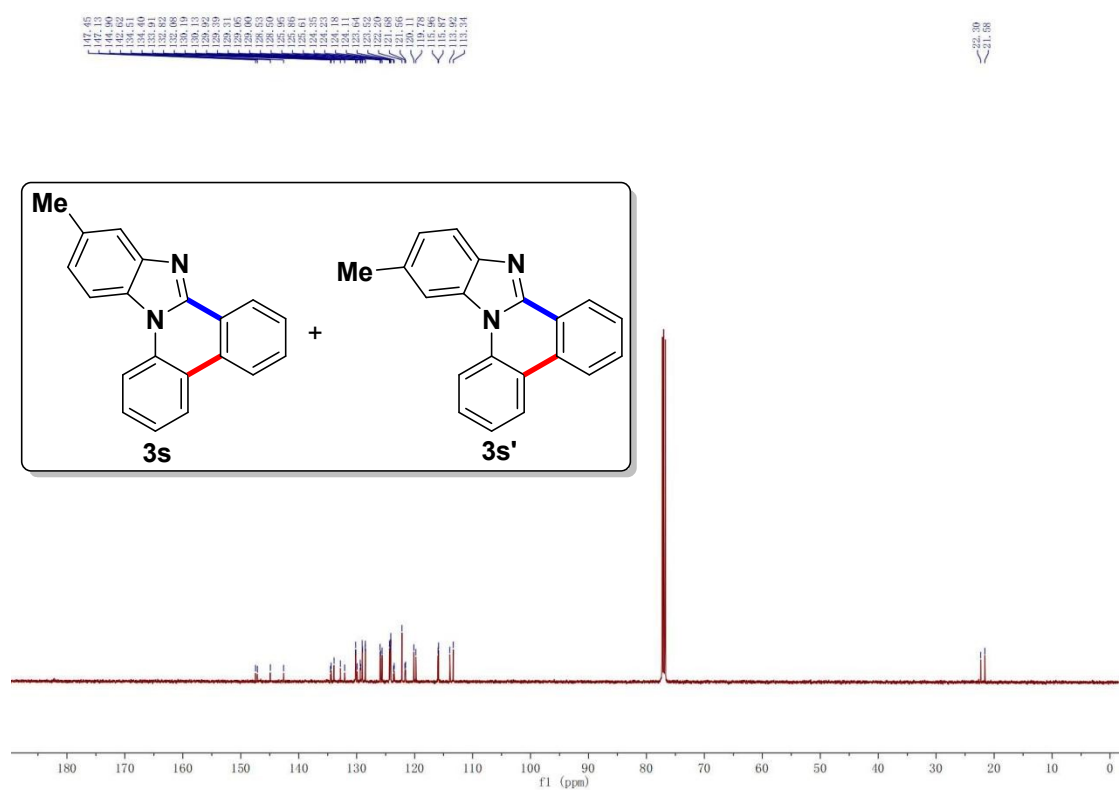

The chemical structure of **3t** is shown in a box. It is a spirocyclic compound consisting of a benzimidazole core fused to a benzene ring. The benzimidazole part has a dimethylamino group (-NMe<sub>2</sub>) attached to the 2-position. The benzene ring is fused to the 1-position of the benzimidazole. The structure is labeled **3t**.

The <sup>1</sup>H NMR spectrum is displayed below the structure. The x-axis is labeled 'f1 (ppm)' and ranges from 0 to 10. The spectrum shows several peaks with corresponding integrations:

- Peak at ~7.2 ppm: integration 1.01
- Peak at ~7.1 ppm: integration 1.02
- Peak at ~7.0 ppm: integration 1.03
- Peak at ~6.9 ppm: integration 1.02
- Peak at ~6.8 ppm: integration 1.03
- Peak at ~6.7 ppm: integration 1.98
- Peak at ~6.6 ppm: integration 1.02
- Peak at ~6.5 ppm: integration 3.07
- Peak at ~4.0 ppm: integration 2.02
- Peak at ~2.5 ppm: integration 6.00

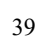

**2-methylindolo[1,2-f]phenanthridine (4a) and 3-methylindolo[1,2-f]phenanthridine (4a')**

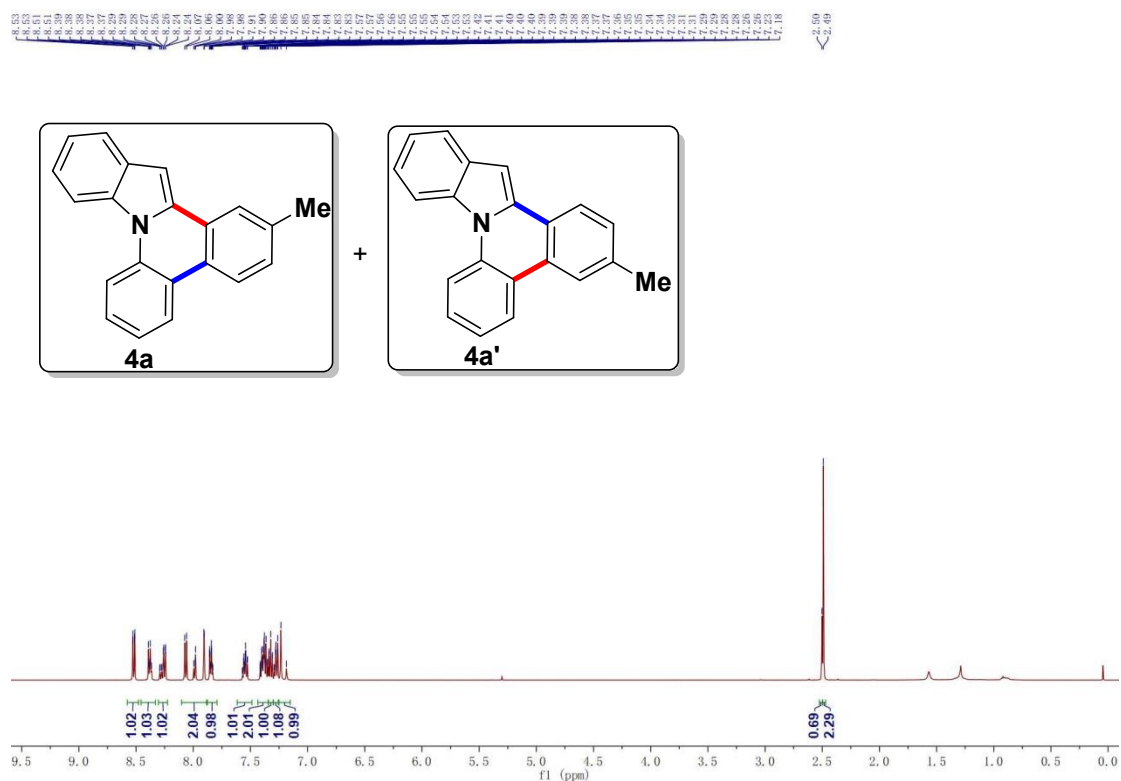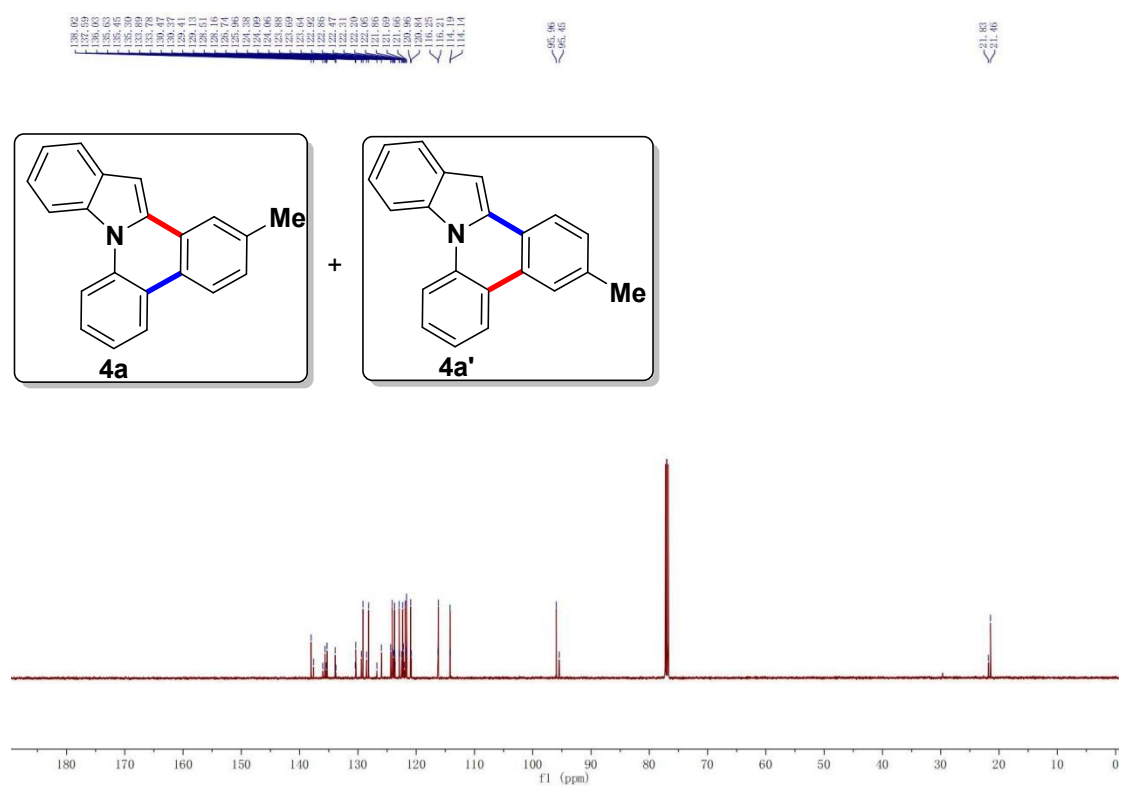



|      |      |      |      |      |      |      |      |      |      |      |      |      |      |      |      |      |      |      |      |      |      |      |      |      |      |      |      |      |      |      |      |      |      |      |      |      |      |      |      |      |      |      |      |      |      |      |      |      |      |      |      |      |      |      |      |      |      |      |      |      |      |      |      |      |      |      |      |      |      |      |      |      |      |      |      |      |      |      |      |      |      |      |      |      |      |      |      |      |      |      |      |      |      |      |      |      |      |      |      |      |      |      |      |      |      |      |      |      |      |      |      |      |      |      |      |      |      |      |      |      |      |      |      |      |      |      |      |      |      |      |      |      |      |      |      |      |      |      |      |      |      |      |      |      |      |      |      |      |      |      |      |      |      |      |      |      |      |      |      |      |      |      |      |      |      |      |      |      |      |      |      |      |      |      |      |      |      |      |      |      |      |      |      |      |      |      |      |      |      |      |      |      |      |      |      |      |      |      |      |      |      |      |      |      |      |      |      |      |      |      |      |      |      |      |      |      |      |      |      |      |      |      |      |      |      |      |      |      |      |      |      |      |      |      |      |      |      |      |      |      |      |      |      |      |      |      |      |      |      |      |      |      |      |      |      |      |      |      |      |      |      |      |      |      |      |      |      |      |      |      |      |      |      |      |      |      |      |      |      |      |      |      |      |      |      |      |      |      |      |      |      |      |      |      |      |      |      |      |      |      |      |      |      |      |      |      |      |      |      |      |      |      |      |      |      |      |      |      |      |      |      |      |      |      |      |      |      |      |      |      |      |      |      |      |      |      |      |      |      |      |      |      |      |      |      |      |      |      |      |      |      |      |      |      |      |      |      |      |      |      |      |      |      |      |      |      |      |      |      |      |      |      |      |      |      |      |      |      |      |      |      |      |      |      |      |      |      |      |      |      |      |      |      |      |      |      |      |      |      |      |      |      |      |      |      |      |      |      |      |      |      |      |      |      |      |      |      |      |      |      |      |      |      |      |      |      |      |      |      |      |      |      |      |      |      |      |      |      |      |      |      |      |      |      |      |      |      |      |      |      |      |      |      |
|------|------|------|------|------|------|------|------|------|------|------|------|------|------|------|------|------|------|------|------|------|------|------|------|------|------|------|------|------|------|------|------|------|------|------|------|------|------|------|------|------|------|------|------|------|------|------|------|------|------|------|------|------|------|------|------|------|------|------|------|------|------|------|------|------|------|------|------|------|------|------|------|------|------|------|------|------|------|------|------|------|------|------|------|------|------|------|------|------|------|------|------|------|------|------|------|------|------|------|------|------|------|------|------|------|------|------|------|------|------|------|------|------|------|------|------|------|------|------|------|------|------|------|------|------|------|------|------|------|------|------|------|------|------|------|------|------|------|------|------|------|------|------|------|------|------|------|------|------|------|------|------|------|------|------|------|------|------|------|------|------|------|------|------|------|------|------|------|------|------|------|------|------|------|------|------|------|------|------|------|------|------|------|------|------|------|------|------|------|------|------|------|------|------|------|------|------|------|------|------|------|------|------|------|------|------|------|------|------|------|------|------|------|------|------|------|------|------|------|------|------|------|------|------|------|------|------|------|------|------|------|------|------|------|------|------|------|------|------|------|------|------|------|------|------|------|------|------|------|------|------|------|------|------|------|------|------|------|------|------|------|------|------|------|------|------|------|------|------|------|------|------|------|------|------|------|------|------|------|------|------|------|------|------|------|------|------|------|------|------|------|------|------|------|------|------|------|------|------|------|------|------|------|------|------|------|------|------|------|------|------|------|------|------|------|------|------|------|------|------|------|------|------|------|------|------|------|------|------|------|------|------|------|------|------|------|------|------|------|------|------|------|------|------|------|------|------|------|------|------|------|------|------|------|------|------|------|------|------|------|------|------|------|------|------|------|------|------|------|------|------|------|------|------|------|------|------|------|------|------|------|------|------|------|------|------|------|------|------|------|------|------|------|------|------|------|------|------|------|------|------|------|------|------|------|------|------|------|------|------|------|------|------|------|------|------|------|------|------|------|------|------|------|------|------|------|------|------|------|------|------|------|------|------|------|------|------|------|------|------|------|------|------|------|------|------|------|------|------|------|------|------|------|------|
| 8.48 | 8.47 | 8.46 | 8.45 | 8.44 | 8.43 | 8.42 | 8.41 | 8.40 | 8.39 | 8.38 | 8.37 | 8.36 | 8.35 | 8.34 | 8.33 | 8.32 | 8.31 | 8.30 | 8.29 | 8.28 | 8.27 | 8.26 | 8.25 | 8.24 | 8.23 | 8.22 | 8.21 | 8.20 | 8.19 | 8.18 | 8.17 | 8.16 | 8.15 | 8.14 | 8.13 | 8.12 | 8.11 | 8.10 | 8.09 | 8.08 | 8.07 | 8.06 | 8.05 | 8.04 | 8.03 | 8.02 | 8.01 | 8.00 | 7.99 | 7.98 | 7.97 | 7.96 | 7.95 | 7.94 | 7.93 | 7.92 | 7.91 | 7.90 | 7.89 | 7.88 | 7.87 | 7.86 | 7.85 | 7.84 | 7.83 | 7.82 | 7.81 | 7.80 | 7.79 | 7.78 | 7.77 | 7.76 | 7.75 | 7.74 | 7.73 | 7.72 | 7.71 | 7.70 | 7.69 | 7.68 | 7.67 | 7.66 | 7.65 | 7.64 | 7.63 | 7.62 | 7.61 | 7.60 | 7.59 | 7.58 | 7.57 | 7.56 | 7.55 | 7.54 | 7.53 | 7.52 | 7.51 | 7.50 | 7.49 | 7.48 | 7.47 | 7.46 | 7.45 | 7.44 | 7.43 | 7.42 | 7.41 | 7.40 | 7.39 | 7.38 | 7.37 | 7.36 | 7.35 | 7.34 | 7.33 | 7.32 | 7.31 | 7.30 | 7.29 | 7.28 | 7.27 | 7.26 | 7.25 | 7.24 | 7.23 | 7.22 | 7.21 | 7.20 | 7.19 | 7.18 | 7.17 | 7.16 | 7.15 | 7.14 | 7.13 | 7.12 | 7.11 | 7.10 | 7.09 | 7.08 | 7.07 | 7.06 | 7.05 | 7.04 | 7.03 | 7.02 | 7.01 | 7.00 | 6.99 | 6.98 | 6.97 | 6.96 | 6.95 | 6.94 | 6.93 | 6.92 | 6.91 | 6.90 | 6.89 | 6.88 | 6.87 | 6.86 | 6.85 | 6.84 | 6.83 | 6.82 | 6.81 | 6.80 | 6.79 | 6.78 | 6.77 | 6.76 | 6.75 | 6.74 | 6.73 | 6.72 | 6.71 | 6.70 | 6.69 | 6.68 | 6.67 | 6.66 | 6.65 | 6.64 | 6.63 | 6.62 | 6.61 | 6.60 | 6.59 | 6.58 | 6.57 | 6.56 | 6.55 | 6.54 | 6.53 | 6.52 | 6.51 | 6.50 | 6.49 | 6.48 | 6.47 | 6.46 | 6.45 | 6.44 | 6.43 | 6.42 | 6.41 | 6.40 | 6.39 | 6.38 | 6.37 | 6.36 | 6.35 | 6.34 | 6.33 | 6.32 | 6.31 | 6.30 | 6.29 | 6.28 | 6.27 | 6.26 | 6.25 | 6.24 | 6.23 | 6.22 | 6.21 | 6.20 | 6.19 | 6.18 | 6.17 | 6.16 | 6.15 | 6.14 | 6.13 | 6.12 | 6.11 | 6.10 | 6.09 | 6.08 | 6.07 | 6.06 | 6.05 | 6.04 | 6.03 | 6.02 | 6.01 | 6.00 | 5.99 | 5.98 | 5.97 | 5.96 | 5.95 | 5.94 | 5.93 | 5.92 | 5.91 | 5.90 | 5.89 | 5.88 | 5.87 | 5.86 | 5.85 | 5.84 | 5.83 | 5.82 | 5.81 | 5.80 | 5.79 | 5.78 | 5.77 | 5.76 | 5.75 | 5.74 | 5.73 | 5.72 | 5.71 | 5.70 | 5.69 | 5.68 | 5.67 | 5.66 | 5.65 | 5.64 | 5.63 | 5.62 | 5.61 | 5.60 | 5.59 | 5.58 | 5.57 | 5.56 | 5.55 | 5.54 | 5.53 | 5.52 | 5.51 | 5.50 | 5.49 | 5.48 | 5.47 | 5.46 | 5.45 | 5.44 | 5.43 | 5.42 | 5.41 | 5.40 | 5.39 | 5.38 | 5.37 | 5.36 | 5.35 | 5.34 | 5.33 | 5.32 | 5.31 | 5.30 | 5.29 | 5.28 | 5.27 | 5.26 | 5.25 | 5.24 | 5.23 | 5.22 | 5.21 | 5.20 | 5.19 | 5.18 | 5.17 | 5.16 | 5.15 | 5.14 | 5.13 | 5.12 | 5.11 | 5.10 | 5.09 | 5.08 | 5.07 | 5.06 | 5.05 | 5.04 | 5.03 | 5.02 | 5.01 | 5.00 | 4.99 | 4.98 | 4.97 | 4.96 | 4.95 | 4.94 | 4.93 | 4.92 | 4.91 | 4.90 | 4.89 | 4.88 | 4.87 | 4.86 | 4.85 | 4.84 | 4.83 | 4.82 | 4.81 | 4.80 | 4.79 | 4.78 | 4.77 | 4.76 | 4.75 | 4.74 | 4.73 | 4.72 | 4.71 | 4.70 | 4.69 | 4.68 | 4.67 | 4.66 | 4.65 | 4.64 | 4.63 | 4.62 | 4.61 | 4.60 | 4.59 | 4.58 | 4.57 | 4.56 | 4.55 | 4.54 | 4.53 | 4.52 | 4.51 | 4.50 | 4.49 | 4.48 | 4.47 | 4.46 | 4.45 | 4.44 | 4.43 | 4.42 | 4.41 | 4.40 | 4.39 | 4.38 | 4.37 | 4.36 | 4.35 | 4.34 | 4.33 | 4.32 | 4.31 | 4.30 | 4.29 | 4.28 | 4.27 | 4.26 | 4.25 | 4.24 | 4.23 | 4.22 | 4.21 | 4.20 | 4.19 | 4.18 | 4.17 | 4.16 | 4.15 | 4.14 | 4.13 | 4.12 | 4.11 | 4.10 | 4.09 | 4.08 | 4.07 | 4.06 | 4.05 | 4.04 | 4.03 | 4.02 | 4.01 | 4.00 | 3.99 | 3.98 | 3.97 | 3.96 | 3.95 |
|------|------|------|------|------|------|------|------|------|------|------|------|------|------|------|------|------|------|------|------|------|------|------|------|------|------|------|------|------|------|------|------|------|------|------|------|------|------|------|------|------|------|------|------|------|------|------|------|------|------|------|------|------|------|------|------|------|------|------|------|------|------|------|------|------|------|------|------|------|------|------|------|------|------|------|------|------|------|------|------|------|------|------|------|------|------|------|------|------|------|------|------|------|------|------|------|------|------|------|------|------|------|------|------|------|------|------|------|------|------|------|------|------|------|------|------|------|------|------|------|------|------|------|------|------|------|------|------|------|------|------|------|------|------|------|------|------|------|------|------|------|------|------|------|------|------|------|------|------|------|------|------|------|------|------|------|------|------|------|------|------|------|------|------|------|------|------|------|------|------|------|------|------|------|------|------|------|------|------|------|------|------|------|------|------|------|------|------|------|------|------|------|------|------|------|------|------|------|------|------|------|------|------|------|------|------|------|------|------|------|------|------|------|------|------|------|------|------|------|------|------|------|------|------|------|------|------|------|------|------|------|------|------|------|------|------|------|------|------|------|------|------|------|------|------|------|------|------|------|------|------|------|------|------|------|------|------|------|------|------|------|------|------|------|------|------|------|------|------|------|------|------|------|------|------|------|------|------|------|------|------|------|------|------|------|------|------|------|------|------|------|------|------|------|------|------|------|------|------|------|------|------|------|------|------|------|------|------|------|------|------|------|------|------|------|------|------|------|------|------|------|------|------|------|------|------|------|------|------|------|------|------|------|------|------|------|------|------|------|------|------|------|------|------|------|------|------|------|------|------|------|------|------|------|------|------|------|------|------|------|------|------|------|------|------|------|------|------|------|------|------|------|------|------|------|------|------|------|------|------|------|------|------|------|------|------|------|------|------|------|------|------|------|------|------|------|------|------|------|------|------|------|------|------|------|------|------|------|------|------|------|------|------|------|------|------|------|------|------|------|------|------|------|------|------|------|------|------|------|------|------|------|------|------|------|------|------|------|------|------|------|------|------|------|------|------|------|------|------|------|------|------|------|------|

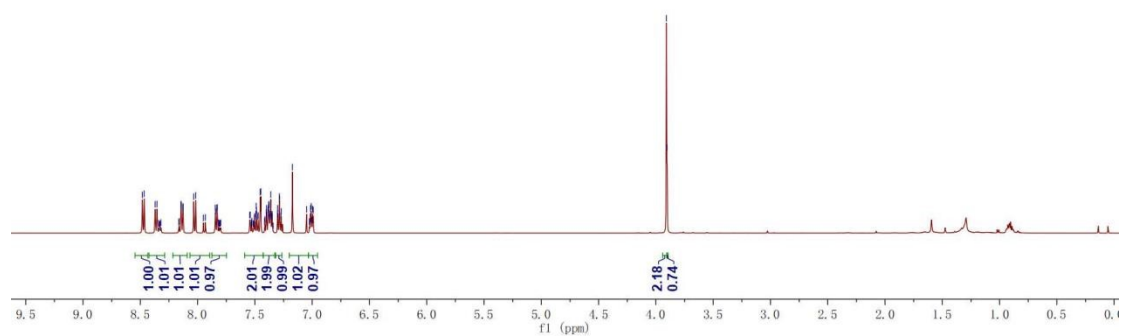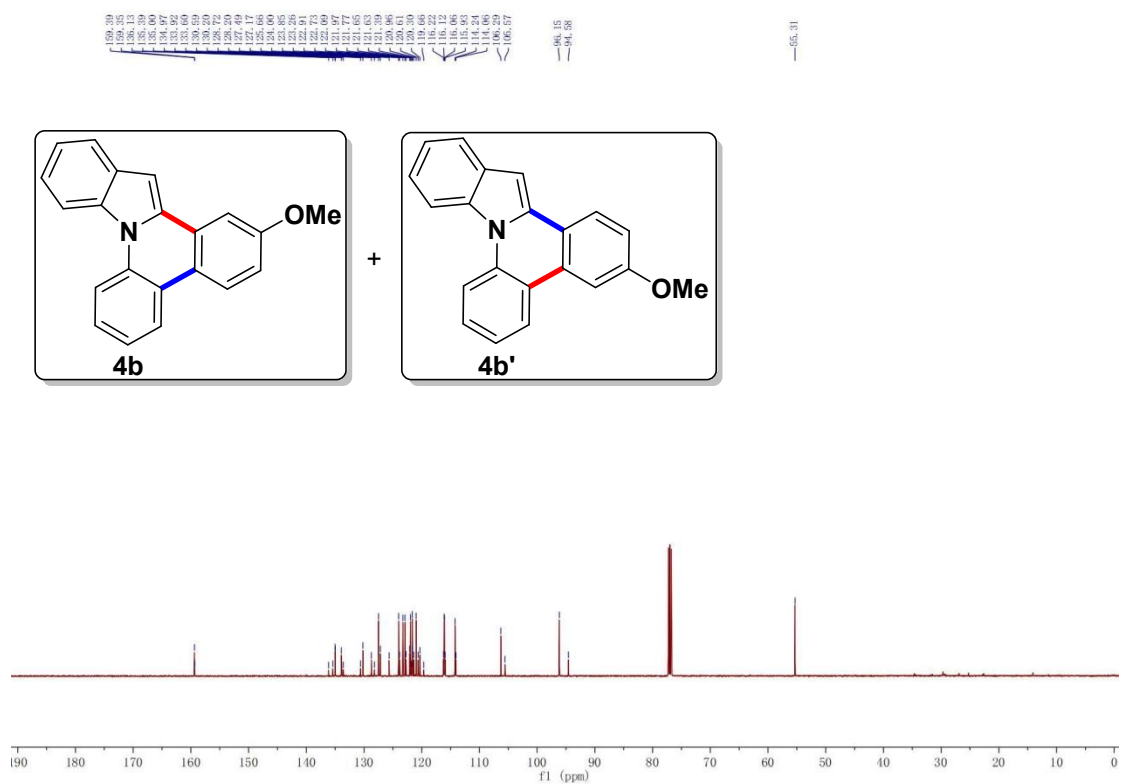

## 2,3-difluoroindolo[1,2-f]phenanthridine (4c)

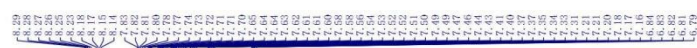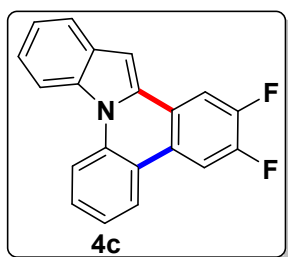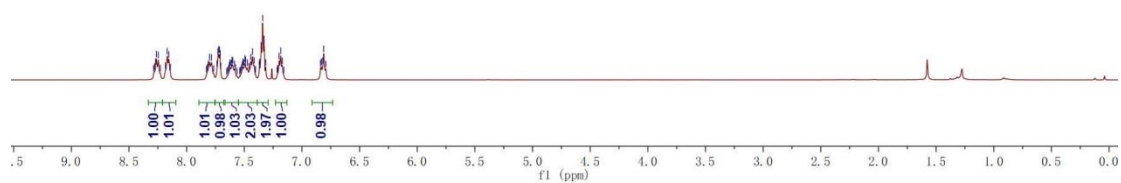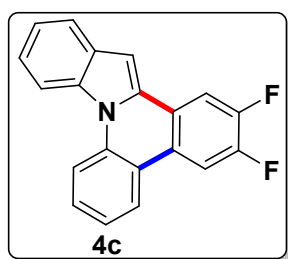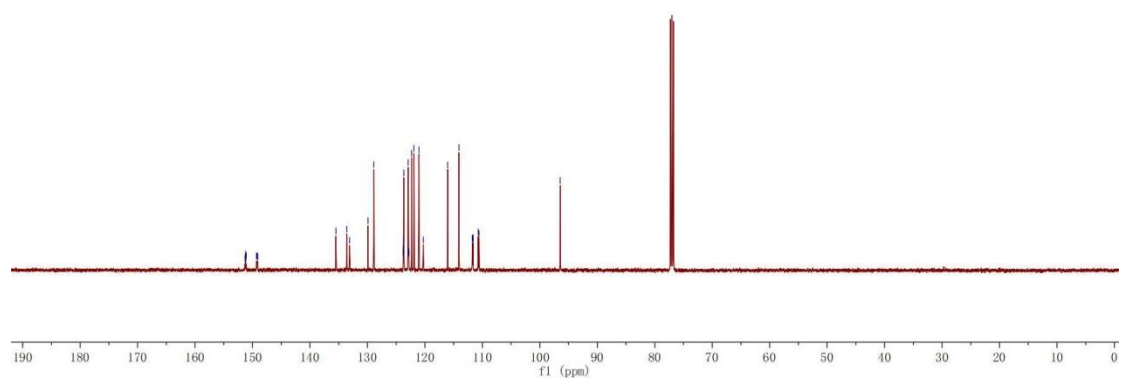

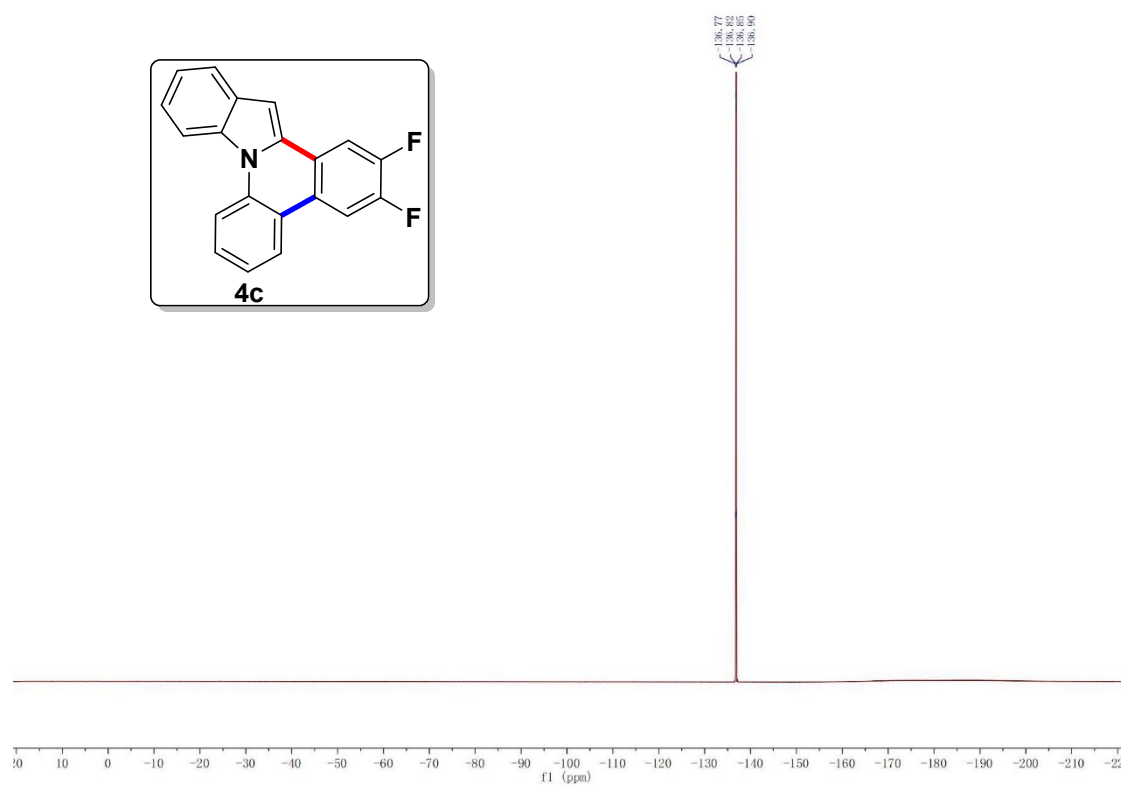

### 2,3-dimethoxyindolo[1,2-f]phenanthridine (4d)

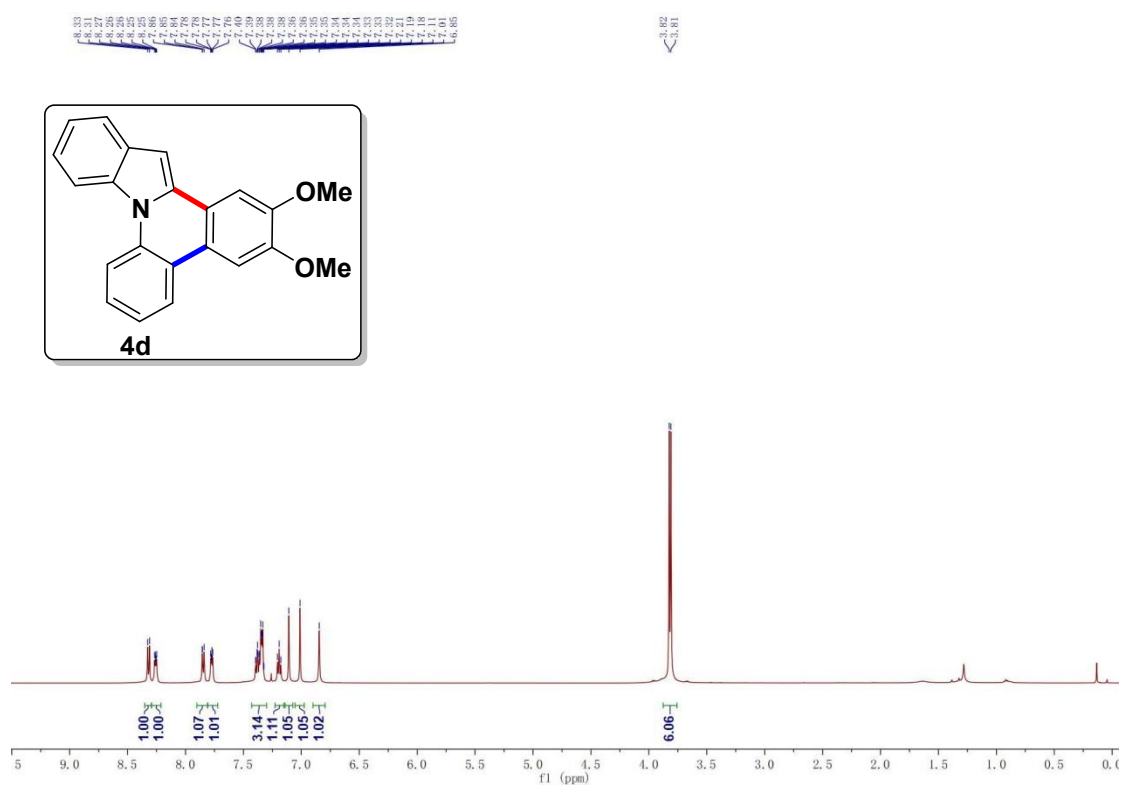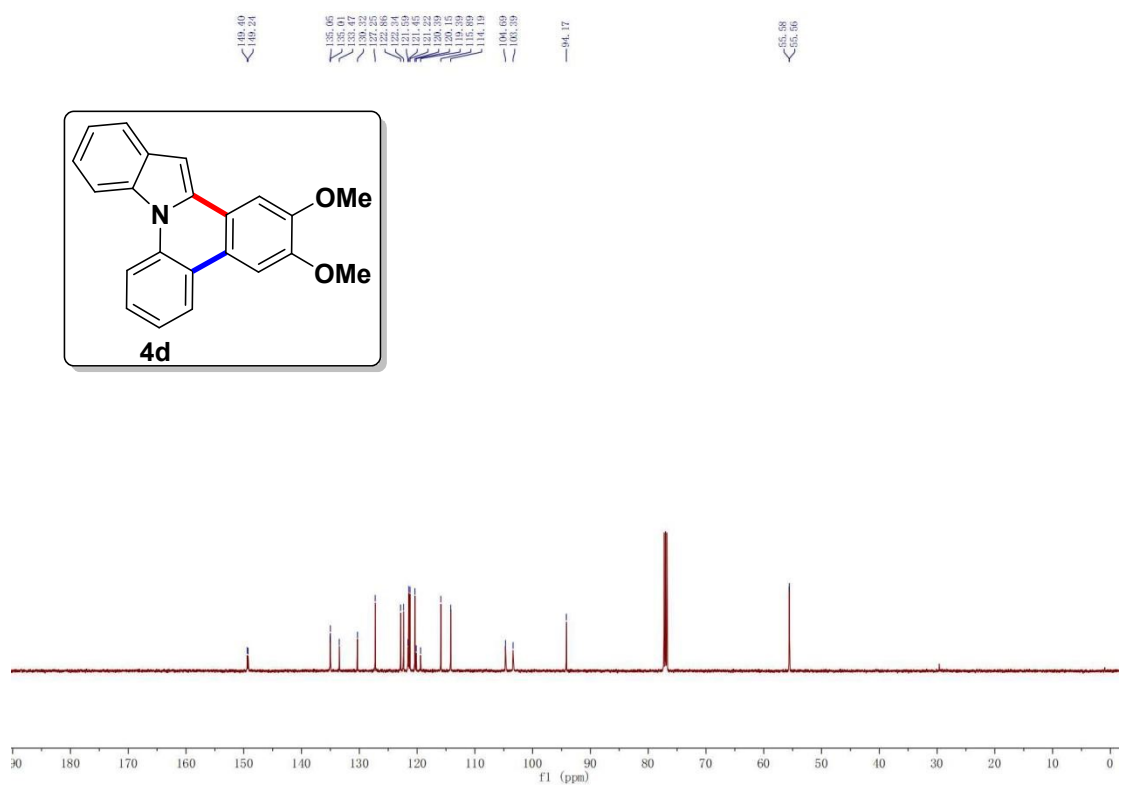

## 2,3,12-trimethoxyindolo[1,2-f]phenanthridine (4e)

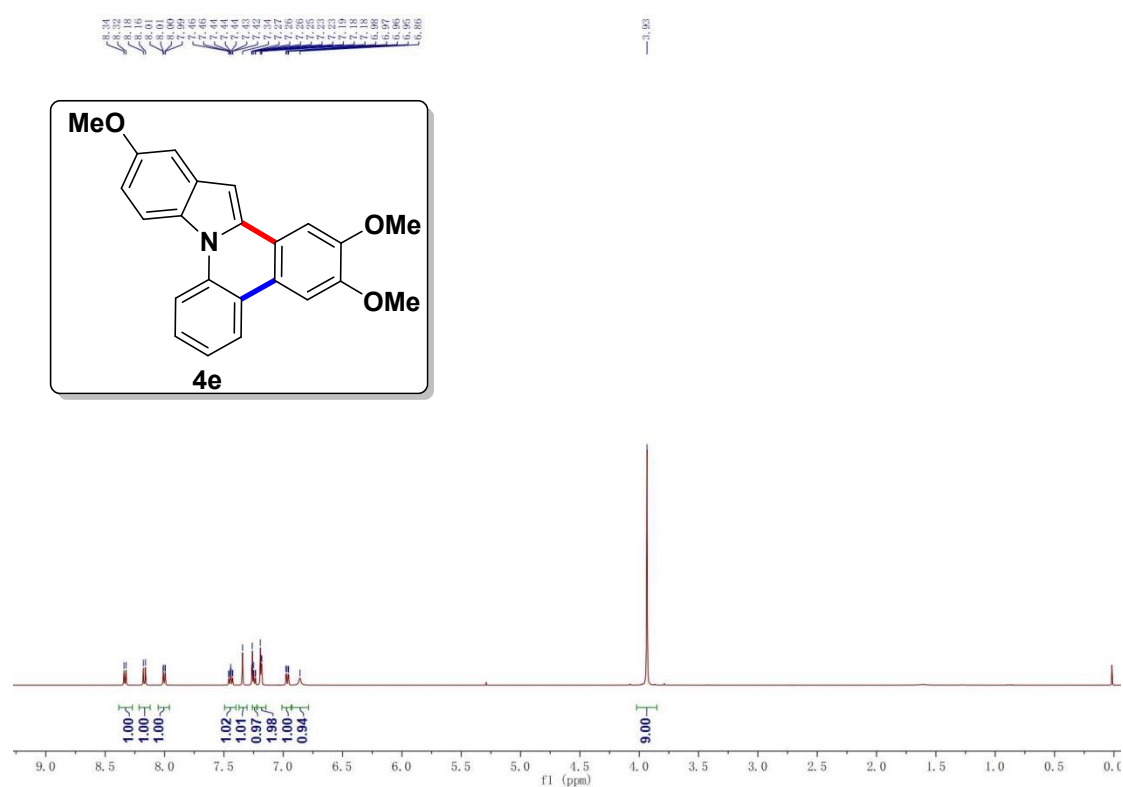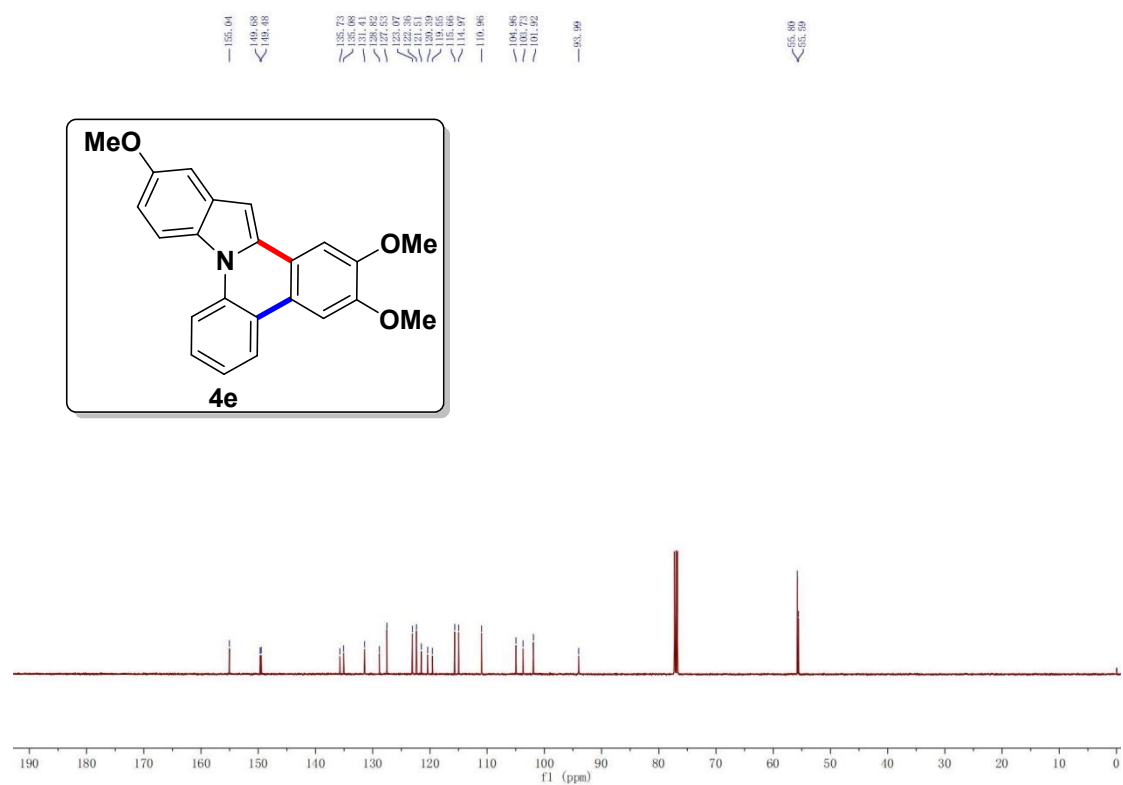

# 12-chloro-2,3-dimethoxyindolo[1,2-f]phenanthridine (4f)

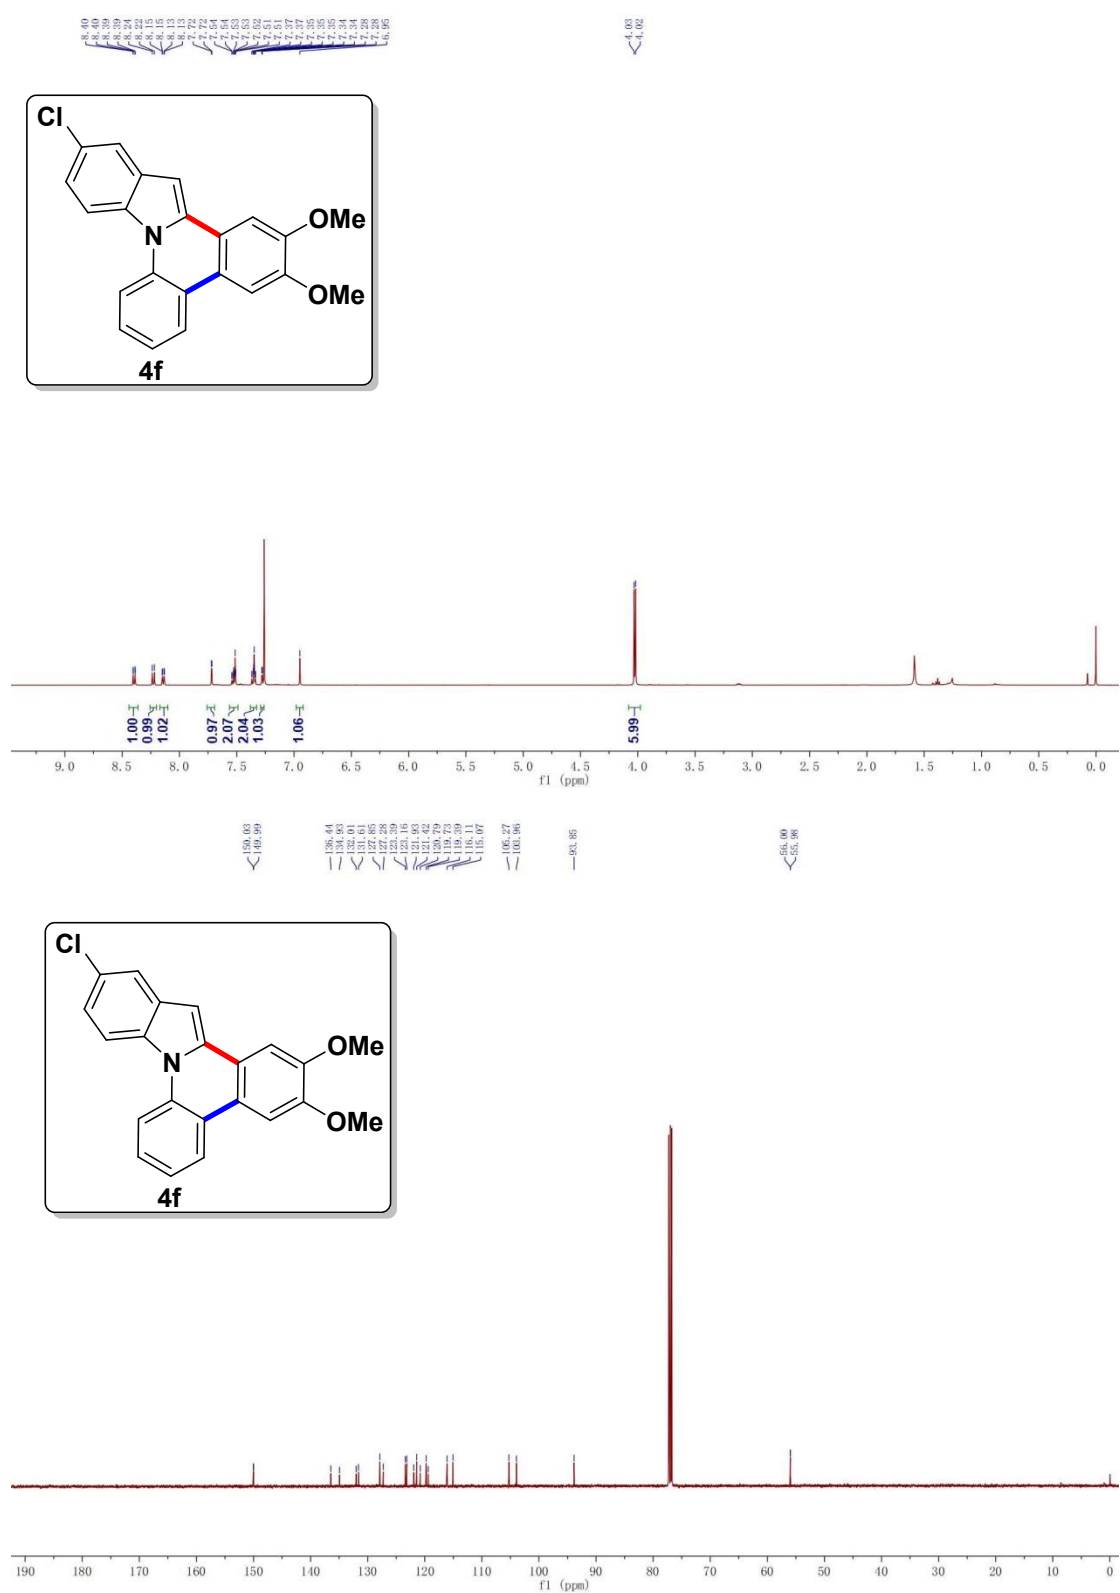

# 12-bromo-2,3-dimethoxyindolo[1,2-f]phenanthridine (4g)

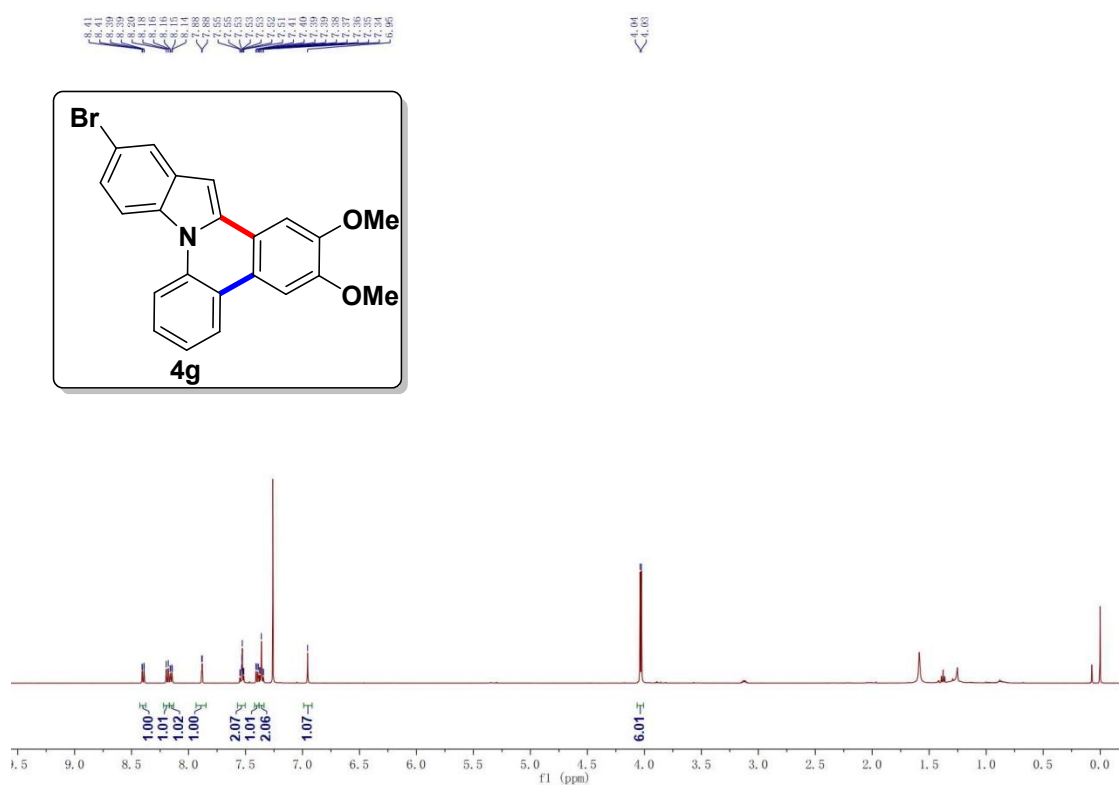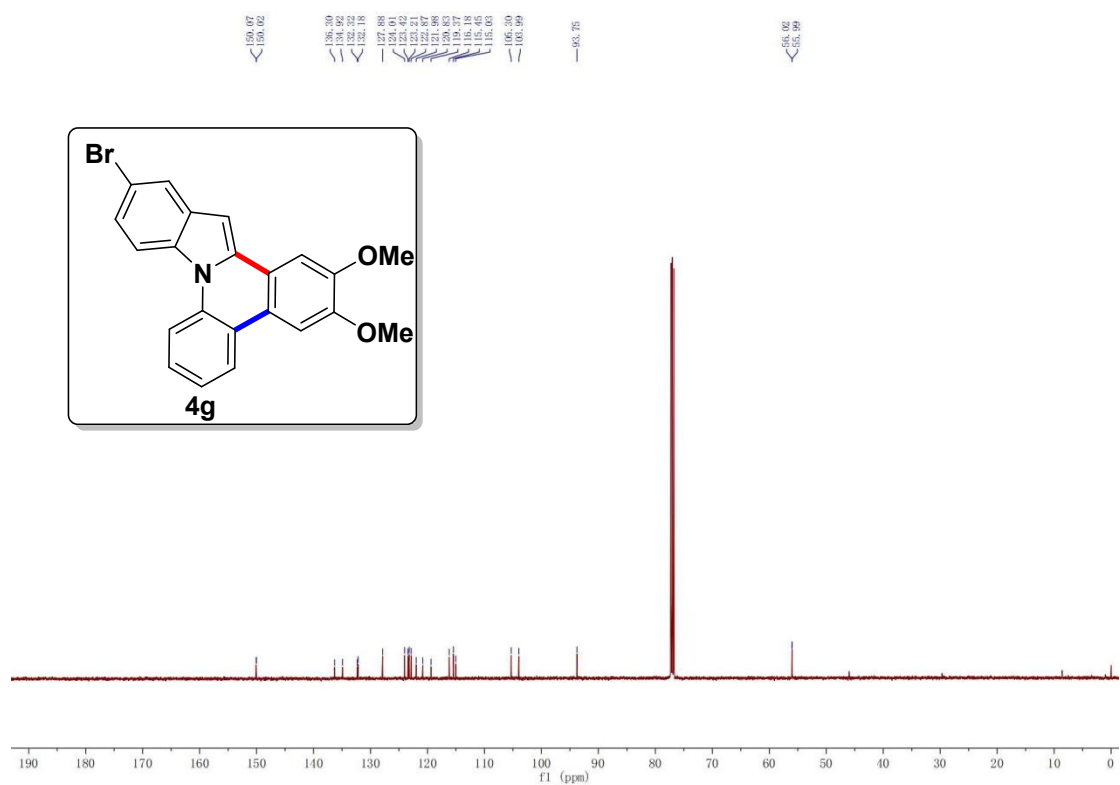

## 2,3-difluoro-12-methylindolo[1,2-f]phenanthridine (4h)

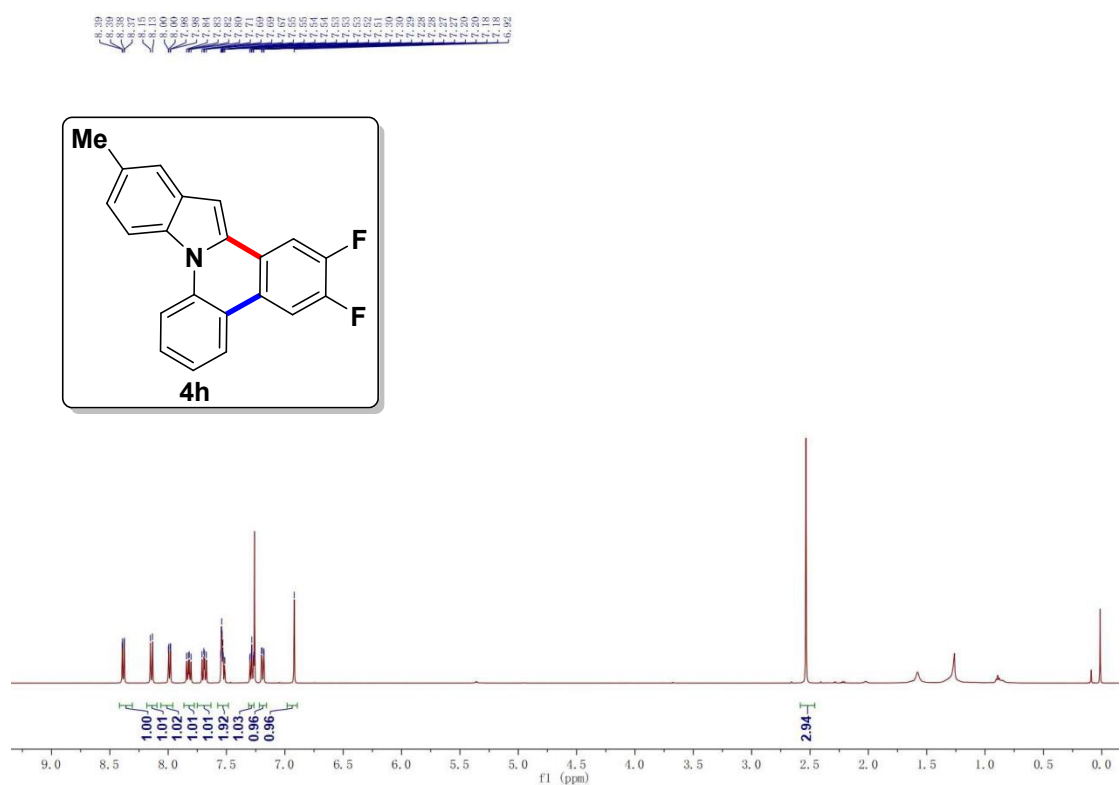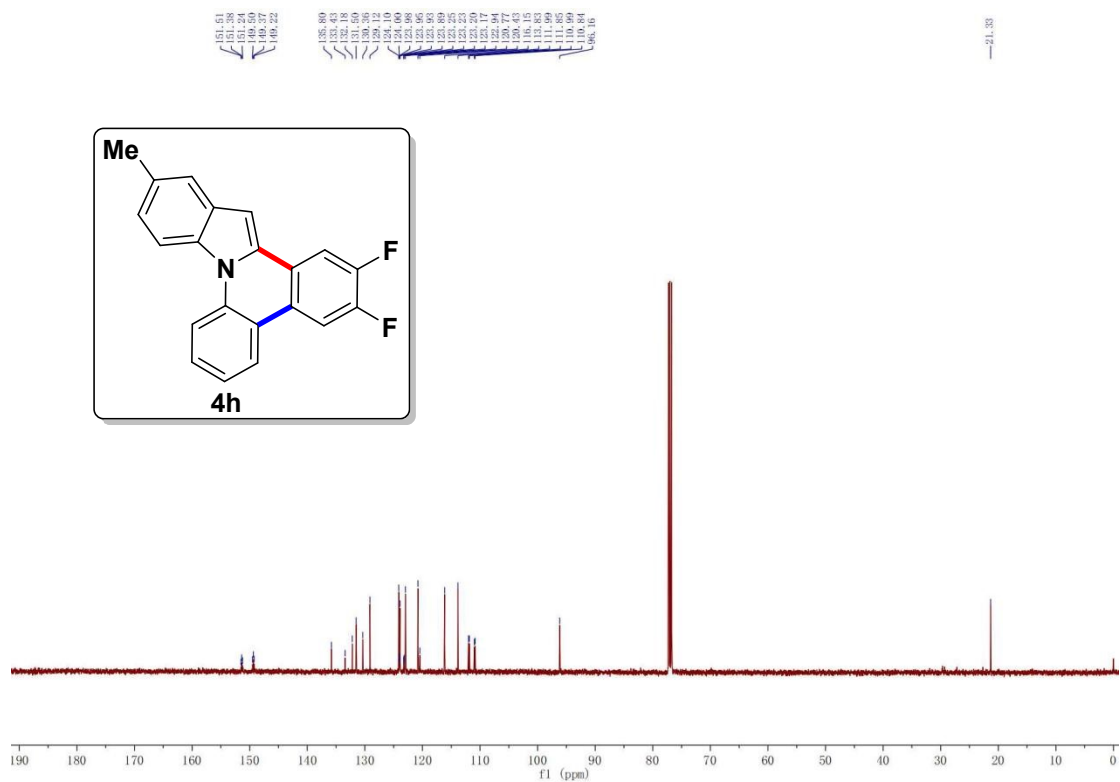



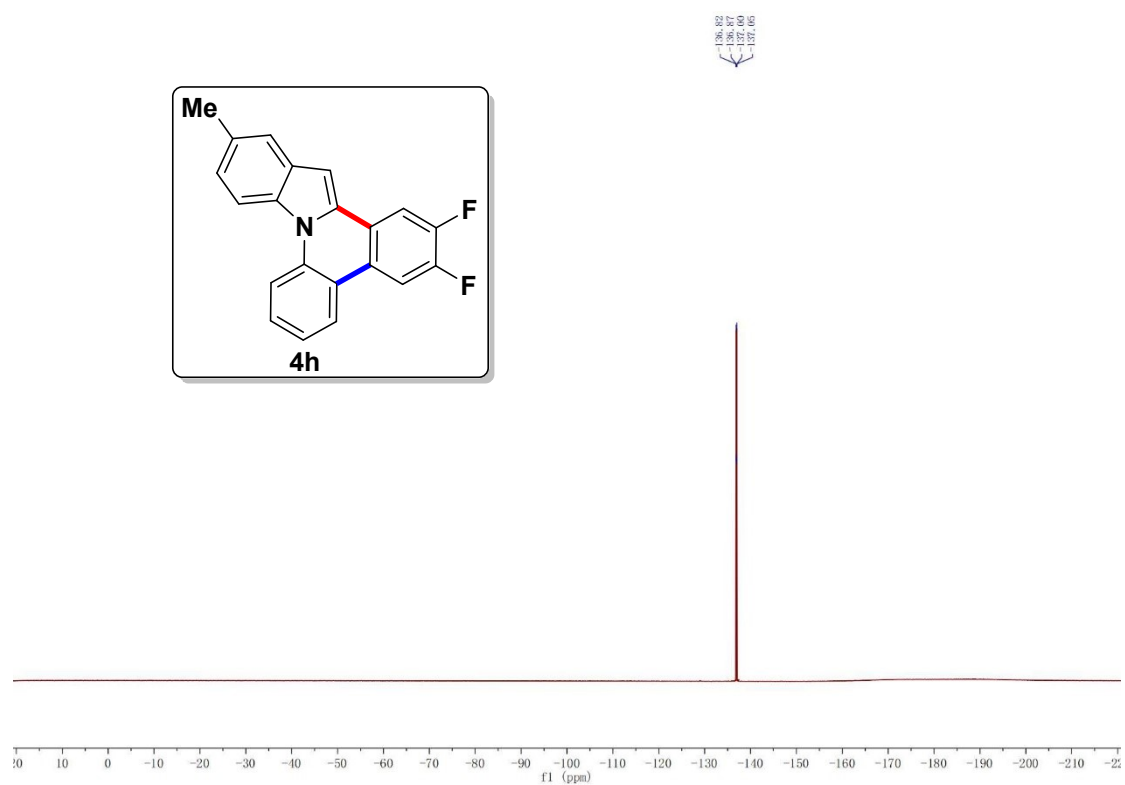

# 12-(benzyloxy)-2,3-difluoroindolo[1,2-f]phenanthridine (4i)

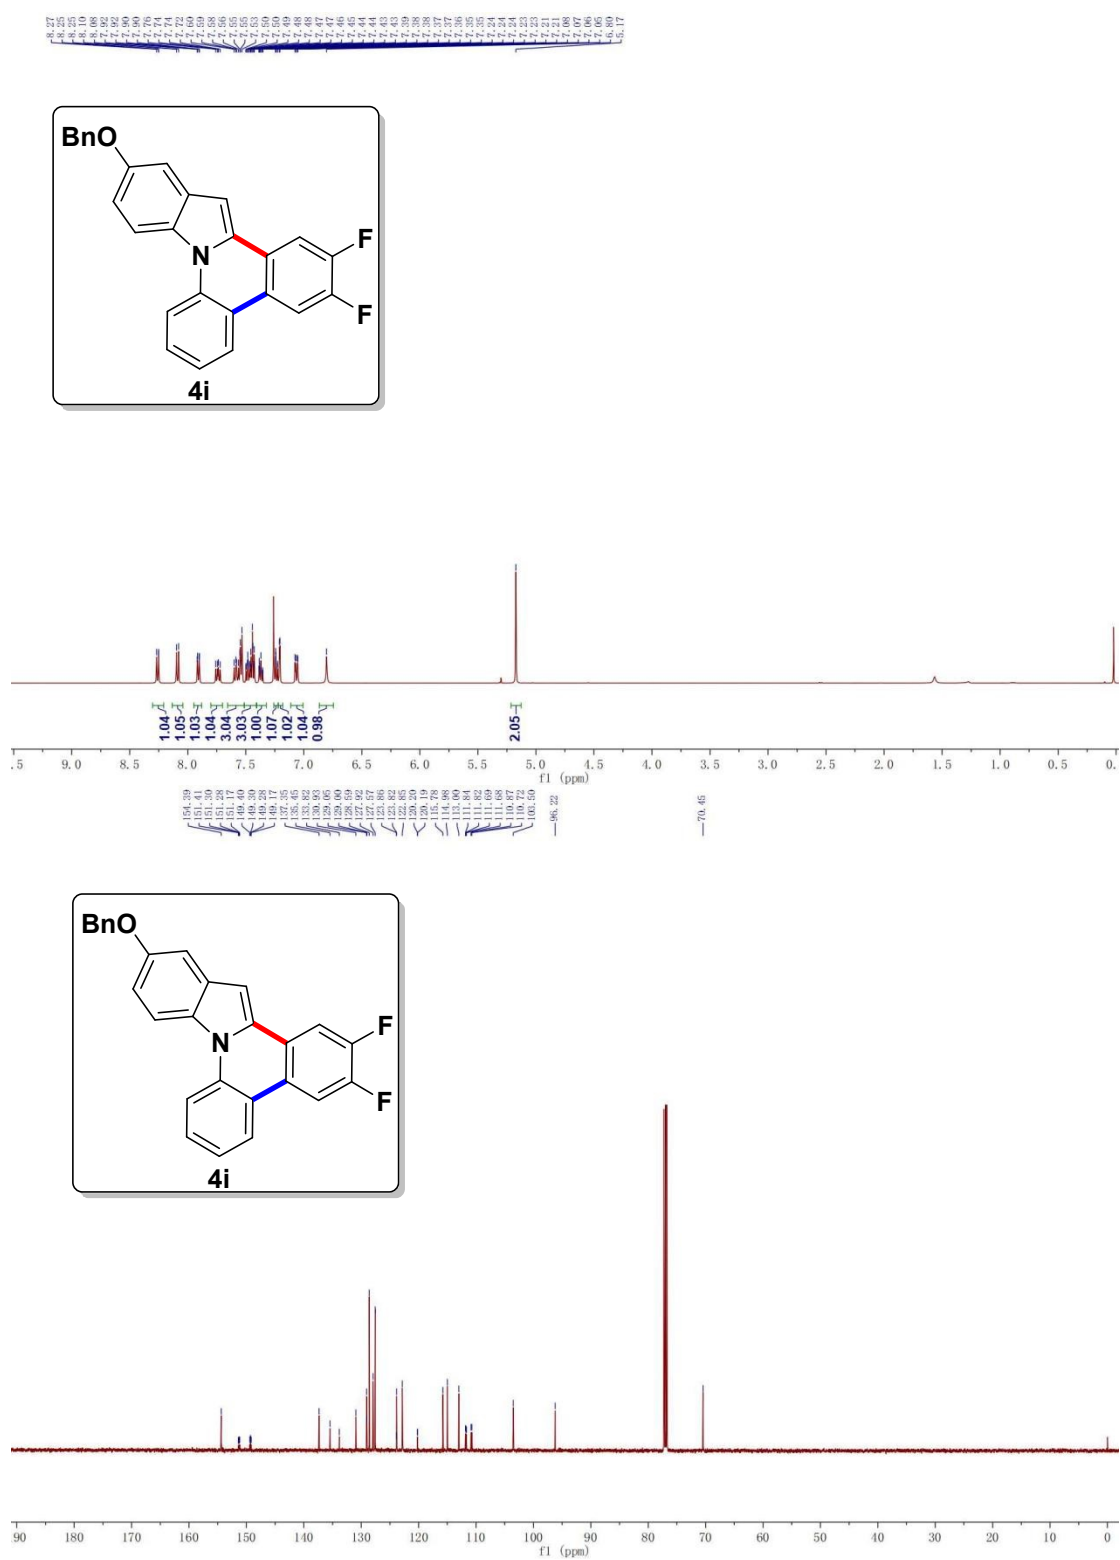

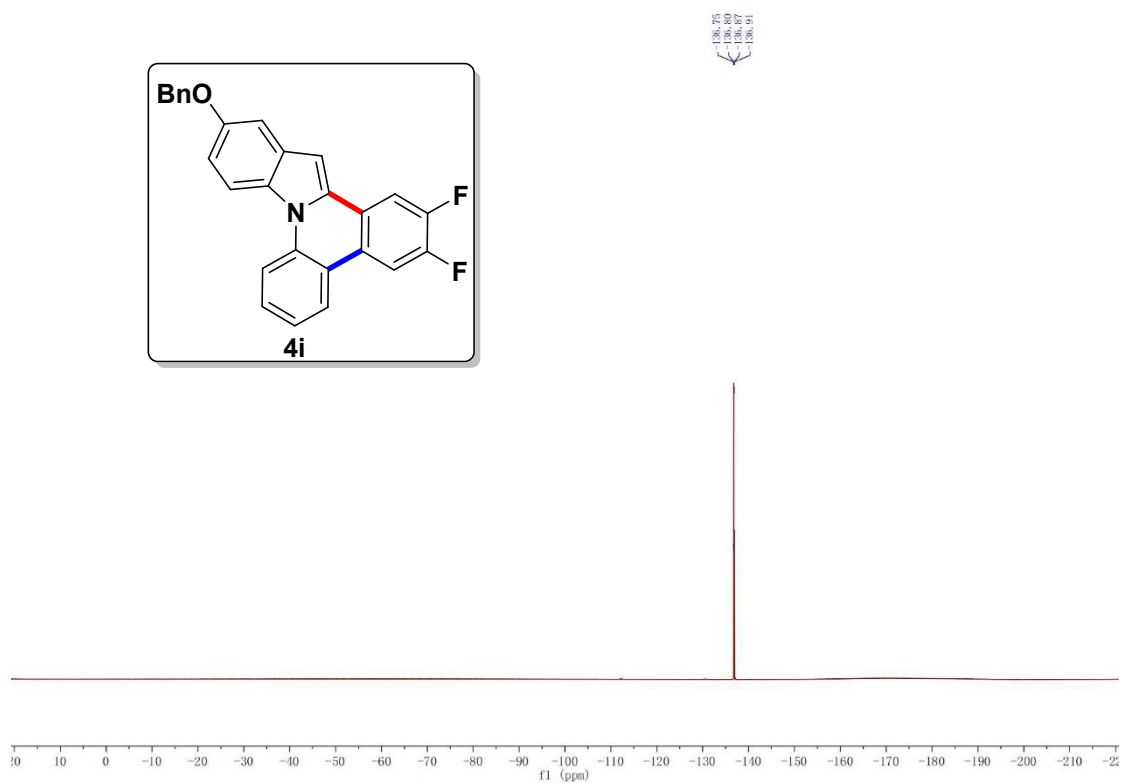

**benzo[6,7]naphtho[1',8':3,4,5]azepino[1,2-a]indole (4j)**

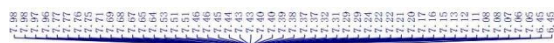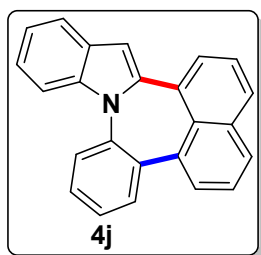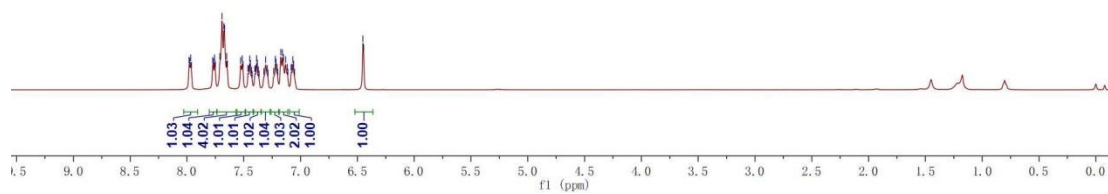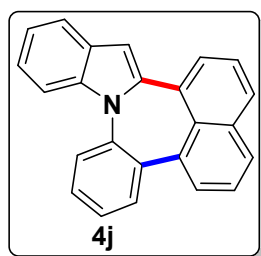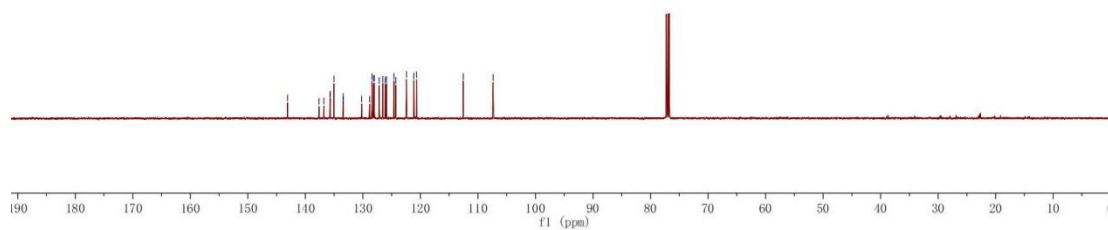

Supplement: d4ob01383b1.pdf [file d4ob01383b1.pdf]
